# Supplementary material
Source: MDPI journal article supplement (https://www.mdpi.com/2073-4433/14/1/79)
Supplement: s1 [file s1]

# Supplementary Materials: Assessing the Impact of Long-Term ENSO, SST, and IOD Dynamics on Extreme Hydrological Events (EHEs) in the Kelani River Basin (KRB), Sri Lanka

Vithana P.I.S. Wijeratne, Gang Li, Muhammad Sajid Mehmood and Adnan Abbas

**Table S1:** Temporal Changes of RAI from 1951 to 2019 in the KRB.

| year | date   | Average |
|------|--------|---------|------|--------|---------|------|--------|---------|------|--------|---------|------|--------|---------|------|--------|---------|------|--------|---------|
| 1951 | Jan-51 | -2.11   | 1954 | Nov-54 | -2.62   | 1958 | Sep-58 | -2.46   | 1962 | Jul-62 | -0.45   | 1966 | May-66 | -1.66   | 1970 | Mar-70 | 3.83    | 1974 | Jan-74 | -3.03   |
| 1951 | Feb-51 | -2.60   | 1954 | Dec-54 | -2.04   | 1958 | Oct-58 | -0.04   | 1962 | Aug-62 | 0.48    | 1966 | Jun-66 | -0.74   | 1970 | Apr-70 | 0.77    | 1974 | Feb-74 | -1.18   |
| 1951 | Mar-51 | -2.76   | 1955 | Jan-55 | -1.92   | 1958 | Nov-58 | -0.67   | 1962 | Sep-62 | 0.41    | 1966 | Jul-66 | -1.61   | 1970 | May-70 | 0.54    | 1974 | Mar-74 | -2.09   |
| 1951 | Apr-51 | -1.43   | 1955 | Feb-55 | -2.67   | 1958 | Dec-58 | -1.16   | 1962 | Oct-62 | 1.03    | 1966 | Aug-66 | -1.39   | 1970 | Jun-70 | -0.43   | 1974 | Apr-74 | 0.98    |
| 1951 | May-51 | -2.44   | 1955 | Mar-55 | -2.64   | 1959 | Jan-59 | -2.62   | 1962 | Nov-62 | 0.15    | 1966 | Sep-66 | 1.76    | 1970 | Jul-70 | 0.19    | 1974 | May-74 | 0.73    |
| 1951 | Jun-51 | -1.78   | 1955 | Apr-55 | -1.53   | 1959 | Feb-59 | -2.72   | 1962 | Dec-62 | -1.07   | 1966 | Oct-66 | 0.76    | 1970 | Aug-70 | -0.94   | 1974 | Jun-74 | 0.35    |
| 1951 | Jul-51 | -2.63   | 1955 | May-55 | -1.91   | 1959 | Mar-59 | -3.01   | 1963 | Jan-63 | -0.95   | 1966 | Nov-66 | 0.19    | 1970 | Sep-70 | -0.10   | 1974 | Jul-74 | 0.71    |
| 1951 | Aug-51 | -2.95   | 1955 | Jun-55 | -2.36   | 1959 | Apr-59 | -2.48   | 1963 | Feb-63 | -0.61   | 1966 | Dec-66 | -1.19   | 1970 | Oct-70 | 0.68    | 1974 | Aug-74 | -0.36   |
| 1951 | Sep-51 | -2.23   | 1955 | Jul-55 | -2.87   | 1959 | May-59 | -2.07   | 1963 | Mar-63 | -1.10   | 1967 | Jan-67 | -2.14   | 1970 | Nov-70 | 0.91    | 1974 | Sep-74 | 0.85    |
| 1951 | Oct-51 | -2.55   | 1955 | Aug-55 | -2.85   | 1959 | Jun-59 | -1.92   | 1963 | Apr-63 | 0.47    | 1967 | Feb-67 | -1.45   | 1970 | Dec-70 | -1.09   | 1974 | Oct-74 | -0.92   |
| 1951 | Nov-51 | -0.91   | 1955 | Sep-55 | -2.36   | 1959 | Jul-59 | -2.60   | 1963 | May-63 | 0.86    | 1967 | Mar-67 | -1.02   | 1971 | Jan-71 | -1.32   | 1974 | Nov-74 | -1.18   |
| 1951 | Dec-51 | -2.58   | 1955 | Oct-55 | -2.57   | 1959 | Aug-59 | -2.63   | 1963 | Jun-63 | 0.29    | 1967 | Apr-67 | -0.76   | 1971 | Feb-71 | -1.57   | 1974 | Dec-74 | 0.04    |
| 1952 | Jan-52 | -2.45   | 1955 | Nov-55 | -1.79   | 1959 | Sep-59 | -2.61   | 1963 | Jul-63 | 0.72    | 1967 | May-67 | 0.48    | 1971 | Mar-71 | -1.62   | 1975 | Jan-75 | -2.32   |
| 1952 | Feb-52 | -2.20   | 1955 | Dec-55 | -2.24   | 1959 | Oct-59 | -1.91   | 1963 | Aug-63 | -0.41   | 1967 | Jun-67 | 0.23    | 1971 | Apr-71 | 0.50    | 1975 | Feb-75 | -1.71   |
| 1952 | Mar-52 | -2.77   | 1956 | Jan-56 | -2.80   | 1959 | Nov-59 | -1.51   | 1963 | Sep-63 | 1.24    | 1967 | Jul-67 | 0.04    | 1971 | May-71 | -0.09   | 1975 | Mar-75 | -0.72   |
| 1952 | Apr-52 | -2.46   | 1956 | Feb-56 | -2.95   | 1959 | Dec-59 | -2.20   | 1963 | Oct-63 | 1.57    | 1967 | Aug-67 | -0.61   | 1971 | Jun-71 | 0.44    | 1975 | Apr-75 | 0.83    |
| 1952 | May-52 | -1.79   | 1956 | Mar-56 | -2.85   | 1960 | Jan-60 | -2.83   | 1963 | Nov-63 | 1.02    | 1967 | Sep-67 | -0.17   | 1971 | Jul-71 | -0.49   | 1975 | May-75 | 0.55    |
| 1952 | Jun-52 | -2.65   | 1956 | Apr-56 | -2.61   | 1960 | Feb-60 | -1.80   | 1963 | Dec-63 | 0.07    | 1967 | Oct-67 | 1.84    | 1971 | Aug-71 | 0.10    | 1975 | Jun-75 | 0.92    |
| 1952 | Jul-52 | -2.67   | 1956 | May-56 | -2.77   | 1960 | Mar-60 | -2.80   | 1964 | Jan-64 | -1.79   | 1967 | Nov-67 | 1.05    | 1971 | Sep-71 | 1.43    | 1975 | Jul-75 | -0.62   |
| 1952 | Aug-52 | -2.80   | 1956 | Jun-56 | -2.08   | 1960 | Apr-60 | -2.28   | 1964 | Feb-64 | -0.77   | 1967 | Dec-67 | 0.28    | 1971 | Oct-71 | 0.55    | 1975 | Aug-75 | -0.28   |
| 1952 | Sep-52 | -2.82   | 1956 | Jul-56 | -2.85   | 1960 | May-60 | -2.40   | 1964 | Mar-64 | -0.61   | 1968 | Jan-68 | -1.85   | 1971 | Nov-71 | -0.90   | 1975 | Sep-75 | 0.40    |
| 1952 | Oct-52 | -2.29   | 1956 | Aug-56 | -2.58   | 1960 | Jun-60 | -2.82   | 1964 | Apr-64 | -0.28   | 1968 | Feb-68 | -2.28   | 1971 | Dec-71 | 0.13    | 1975 | Oct-75 | 0.21    |
| 1952 | Nov-52 | -2.40   | 1956 | Sep-56 | -2.79   | 1960 | Jul-60 | -1.69   | 1964 | May-64 | 0.74    | 1968 | Mar-68 | -1.23   | 1972 | Jan-72 | -2.32   | 1975 | Nov-75 | 1.45    |
| 1952 | Dec-52 | -2.84   | 1956 | Oct-56 | -2.35   | 1960 | Aug-60 | -2.78   | 1964 | Jun-64 | -0.29   | 1968 | Apr-68 | -0.38   | 1972 | Feb-72 | -2.87   | 1975 | Dec-75 | -0.91   |
| 1953 | Jan-53 | -2.58   | 1956 | Nov-56 | -1.56   | 1960 | Sep-60 | -2.42   | 1964 | Jul-64 | 0.60    | 1968 | May-68 | -0.63   | 1972 | Mar-72 | -1.87   | 1976 | Jan-76 | -2.23   |
| 1953 | Feb-53 | -2.67   | 1956 | Dec-56 | -2.28   | 1960 | Oct-60 | -0.88   | 1964 | Aug-64 | -0.92   | 1968 | Jun-68 | 0.78    | 1972 | Apr-72 | -0.11   | 1976 | Feb-76 | -2.64   |
| 1953 | Mar-53 | -2.81   | 1957 | Jan-57 | -2.82   | 1960 | Nov-60 | -0.96   | 1964 | Sep-64 | 0.10    | 1968 | Jul-68 | 0.57    | 1972 | May-72 | 1.63    | 1976 | Mar-76 | -1.52   |
| 1953 | Apr-53 | -2.42   | 1957 | Feb-57 | -2.70   | 1960 | Dec-60 | -2.72   | 1964 | Oct-64 | 0.73    | 1968 | Aug-68 | -1.41   | 1972 | Jun-72 | -0.37   | 1976 | Apr-76 | 0.02    |
| 1953 | May-53 | -3.02   | 1957 | Mar-57 | -2.86   | 1961 | Jan-61 | -1.81   | 1964 | Nov-64 | 0.11    | 1968 | Sep-68 | 0.15    | 1972 | Jul-72 | -0.70   | 1976 | May-76 | -0.74   |
| 1953 | Jun-53 | -2.66   | 1957 | Apr-57 | -2.83   | 1961 | Feb-61 | -1.61   | 1964 | Dec-64 | -1.30   | 1968 | Oct-68 | 0.55    | 1972 | Aug-72 | -1.47   | 1976 | Jun-76 | -1.48   |
| 1953 | Jul-53 | -1.66   | 1957 | May-57 | -2.15   | 1961 | Mar-61 | -0.44   | 1965 | Jan-65 | -2.35   | 1968 | Nov-68 | 0.16    | 1972 | Sep-72 | 0.45    | 1976 | Jul-76 | -0.90   |
| 1953 | Aug-53 | -2.93   | 1957 | Jun-57 | -2.54   | 1961 | Apr-61 | 0.64    | 1965 | Feb-65 | -1.60   | 1968 | Dec-68 | -0.57   | 1972 | Oct-72 | 1.54    | 1976 | Aug-76 | -0.17   |
| 1953 | Sep-53 | -2.67   | 1957 | Jul-57 | -1.37   | 1961 | May-61 | 1.14    | 1965 | Mar-65 | -1.85   | 1969 | Jan-69 | -1.59   | 1972 | Nov-72 | 0.54    | 1976 | Sep-76 | -2.08   |
| 1953 | Oct-53 | -1.80   | 1957 | Aug-57 | -2.57   | 1961 | Jun-61 | 0.13    | 1965 | Apr-65 | 0.61    | 1969 | Feb-69 | -1.77   | 1972 | Dec-72 | -0.28   | 1976 | Oct-76 | 0.91    |
| 1953 | Nov-53 | -1.33   | 1957 | Sep-57 | -2.88   | 1961 | Jul-61 | 0.14    | 1965 | May-65 | 1.54    | 1969 | Mar-69 | -2.04   | 1973 | Jan-73 | -2.83   | 1976 | Nov-76 | 1.15    |
| 1953 | Dec-53 | -2.72   | 1957 | Oct-57 | -0.76   | 1961 | Aug-61 | 0.47    | 1965 | Jun-65 | -1.02   | 1969 | Apr-69 | 0.35    | 1973 | Feb-73 | -2.52   | 1976 | Dec-76 | 0.07    |
| 1954 | Jan-54 | -1.87   | 1957 | Nov-57 | 0.40    | 1961 | Sep-61 | 0.79    | 1965 | Jul-65 | -2.04   | 1969 | May-69 | 1.57    | 1973 | Mar-73 | -0.67   | 1977 | Jan-77 | -2.89   |
| 1954 | Feb-54 | -2.78   | 1957 | Dec-57 | 1.14    | 1961 | Oct-61 | 0.69    | 1965 | Aug-65 | 0.38    | 1969 | Jun-69 | -0.48   | 1973 | Apr-73 | -0.04   | 1977 | Feb-77 | -1.97   |
| 1954 | Mar-54 | -1.94   | 1958 | Jan-58 | -2.24   | 1961 | Nov-61 | 0.62    | 1965 | Sep-65 | 0.00    | 1969 | Jul-69 | -2.11   | 1973 | May-73 | -0.01   | 1977 | Mar-77 | -0.11   |

|      |        |       |      |        |       |      |        |       |      |        |       |      |        |       |      |        |       |      |        |       |
|------|--------|-------|------|--------|-------|------|--------|-------|------|--------|-------|------|--------|-------|------|--------|-------|------|--------|-------|
| 1954 | Apr-54 | -2.14 | 1958 | Feb-58 | -2.45 | 1961 | Dec-61 | -0.27 | 1965 | Oct-65 | 1.09  | 1969 | Aug-69 | 0.16  | 1973 | Jun-73 | 0.26  | 1977 | Apr-77 | -0.15 |
| 1954 | May-54 | -2.47 | 1958 | Mar-58 | -1.83 | 1962 | Jan-62 | -1.44 | 1965 | Nov-65 | 0.21  | 1969 | Sep-69 | -0.87 | 1973 | Jul-73 | -0.60 | 1977 | May-77 | 2.04  |
| 1954 | Jun-54 | -2.88 | 1958 | Apr-58 | -1.57 | 1962 | Feb-62 | -2.24 | 1965 | Dec-65 | 0.17  | 1969 | Oct-69 | 1.48  | 1973 | Aug-73 | -0.98 | 1977 | Jun-77 | 0.32  |
| 1954 | Jul-54 | -2.41 | 1958 | May-58 | 0.14  | 1962 | Mar-62 | -1.13 | 1966 | Jan-66 | -1.19 | 1969 | Nov-69 | -0.34 | 1973 | Sep-73 | -2.03 | 1977 | Jul-77 | -1.31 |
| 1954 | Aug-54 | -2.42 | 1958 | Jun-58 | -0.85 | 1962 | Apr-62 | 0.10  | 1966 | Feb-66 | -2.55 | 1969 | Dec-69 | 0.67  | 1973 | Oct-73 | 0.57  | 1977 | Aug-77 | -0.68 |
| 1954 | Sep-54 | -2.87 | 1958 | Jul-58 | -2.21 | 1962 | May-62 | 1.56  | 1966 | Mar-66 | -0.47 | 1970 | Jan-70 | -1.52 | 1973 | Nov-73 | 0.42  | 1977 | Sep-77 | -0.99 |
| 1954 | Oct-54 | -1.09 | 1958 | Aug-58 | -1.79 | 1962 | Jun-62 | 0.02  | 1966 | Apr-66 | 0.40  | 1970 | Feb-70 | -0.69 | 1973 | Dec-73 | 0.23  | 1977 | Oct-77 | 2.45  |

| year | date   | Average |
|------|--------|---------|------|--------|---------|------|--------|---------|------|--------|---------|------|--------|---------|------|--------|---------|------|--------|---------|
| 1977 | Nov-77 | 0.19    | 1981 | Sep-81 | 0.34    | 1985 | Jul-85 | -1.42   | 1989 | May-89 | 0.44    | 1993 | Mar-93 | -0.94   | 1997 | Jan-97 | -2.10   | 2000 | Nov-00 | -0.80   |
| 1977 | Dec-77 | -1.31   | 1981 | Oct-81 | 0.07    | 1985 | Aug-85 | -0.78   | 1989 | Jun-89 | 0.66    | 1993 | Apr-93 | 0.22    | 1997 | Feb-97 | -2.34   | 2000 | Dec-00 | -1.24   |
| 1978 | Jan-78 | -2.28   | 1981 | Nov-81 | 0.76    | 1985 | Sep-85 | -0.08   | 1989 | Jul-89 | 0.43    | 1993 | May-93 | 2.02    | 1997 | Mar-97 | -1.83   | 2001 | Jan-01 | -0.59   |
| 1978 | Feb-78 | -2.36   | 1981 | Dec-81 | -1.67   | 1985 | Oct-85 | 0.77    | 1989 | Aug-89 | -1.15   | 1993 | Jun-93 | 0.98    | 1997 | Apr-97 | 0.11    | 2001 | Feb-01 | -1.13   |
| 1978 | Mar-78 | -1.12   | 1982 | Jan-82 | -2.81   | 1985 | Nov-85 | 0.39    | 1989 | Sep-89 | 0.22    | 1993 | Jul-93 | -0.36   | 1997 | May-97 | 0.87    | 2001 | Mar-01 | -1.94   |
| 1978 | Apr-78 | -0.78   | 1982 | Feb-82 | -2.93   | 1985 | Dec-85 | 0.14    | 1989 | Oct-89 | 1.00    | 1993 | Aug-93 | -1.28   | 1997 | Jun-97 | -0.06   | 2001 | Apr-01 | 0.73    |
| 1978 | May-78 | 1.96    | 1982 | Mar-82 | 0.03    | 1986 | Jan-86 | -0.18   | 1989 | Nov-89 | 0.51    | 1993 | Sep-93 | 0.20    | 1997 | Jul-97 | 0.71    | 2001 | May-01 | -0.21   |
| 1978 | Jun-78 | -0.37   | 1982 | Apr-82 | 0.03    | 1986 | Feb-86 | -0.47   | 1989 | Dec-89 | -2.19   | 1993 | Oct-93 | 1.88    | 1997 | Aug-97 | -1.06   | 2001 | Jun-01 | -0.15   |
| 1978 | Jul-78 | -0.98   | 1982 | May-82 | 0.94    | 1986 | Mar-86 | -1.27   | 1990 | Jan-90 | -1.18   | 1993 | Nov-93 | 0.97    | 1997 | Sep-97 | 1.35    | 2001 | Jul-01 | -0.47   |
| 1978 | Aug-78 | -1.13   | 1982 | Jun-82 | 0.89    | 1986 | Apr-86 | 0.08    | 1990 | Feb-90 | -2.42   | 1993 | Dec-93 | 0.33    | 1997 | Oct-97 | 2.13    | 2001 | Aug-01 | -2.47   |
| 1978 | Sep-78 | -0.33   | 1982 | Jul-82 | -0.13   | 1986 | May-86 | -0.48   | 1990 | Mar-90 | -0.10   | 1994 | Jan-94 | -1.82   | 1997 | Nov-97 | 1.20    | 2001 | Sep-01 | 0.52    |
| 1978 | Oct-78 | 0.51    | 1982 | Aug-82 | -0.60   | 1986 | Jun-86 | -1.16   | 1990 | Apr-90 | -0.37   | 1994 | Feb-94 | -1.29   | 1997 | Dec-97 | 0.17    | 2001 | Oct-01 | 0.63    |
| 1978 | Nov-78 | 1.29    | 1982 | Sep-82 | -1.28   | 1986 | Jul-86 | -1.99   | 1990 | May-90 | 0.93    | 1994 | Mar-94 | -1.62   | 1998 | Jan-98 | -1.89   | 2001 | Nov-01 | -0.01   |
| 1978 | Dec-78 | -0.61   | 1982 | Oct-82 | 0.62    | 1986 | Aug-86 | -0.37   | 1990 | Jun-90 | 0.26    | 1994 | Apr-94 | -0.57   | 1998 | Feb-98 | -2.69   | 2001 | Dec-01 | -0.52   |
| 1979 | Jan-79 | -2.57   | 1982 | Nov-82 | 1.26    | 1986 | Sep-86 | 0.32    | 1990 | Jul-90 | 0.04    | 1994 | May-94 | 0.93    | 1998 | Mar-98 | -1.77   | 2002 | Jan-02 | -2.35   |
| 1979 | Feb-79 | -1.24   | 1982 | Dec-82 | -1.26   | 1986 | Oct-86 | 0.36    | 1990 | Aug-90 | -2.10   | 1994 | Jun-94 | -0.88   | 1998 | Apr-98 | -0.29   | 2002 | Feb-02 | -1.98   |
| 1979 | Mar-79 | -2.00   | 1983 | Jan-83 | -2.72   | 1986 | Nov-86 | -1.22   | 1990 | Sep-90 | -1.83   | 1994 | Jul-94 | -0.33   | 1998 | May-98 | 0.78    | 2002 | Mar-02 | -1.21   |
| 1979 | Apr-79 | -0.17   | 1983 | Feb-83 | -2.62   | 1986 | Dec-86 | -0.76   | 1990 | Oct-90 | 0.95    | 1994 | Aug-94 | -1.08   | 1998 | Jun-98 | 0.73    | 2002 | Apr-02 | 1.46    |
| 1979 | May-79 | -0.34   | 1983 | Mar-83 | -2.36   | 1987 | Jan-87 | -1.63   | 1990 | Nov-90 | 0.71    | 1994 | Sep-94 | 0.60    | 1998 | Jul-98 | 1.32    | 2002 | May-02 | 0.41    |
| 1979 | Jun-79 | 0.55    | 1983 | Apr-83 | -2.05   | 1987 | Feb-87 | -2.96   | 1990 | Dec-90 | -0.74   | 1994 | Oct-94 | 1.73    | 1998 | Aug-98 | 0.33    | 2002 | Jun-02 | -0.26   |
| 1979 | Jul-79 | -0.41   | 1983 | May-83 | 0.37    | 1987 | Mar-87 | -1.87   | 1991 | Jan-91 | -1.06   | 1994 | Nov-94 | 1.06    | 1998 | Sep-98 | 0.92    | 2002 | Jul-02 | -1.23   |
| 1979 | Aug-79 | -2.14   | 1983 | Jun-83 | -0.62   | 1987 | Apr-87 | -0.09   | 1991 | Feb-91 | -1.97   | 1994 | Dec-94 | -2.45   | 1998 | Oct-98 | 0.72    | 2002 | Aug-02 | -1.39   |
| 1979 | Sep-79 | 1.40    | 1983 | Jul-83 | -0.46   | 1987 | May-87 | 0.18    | 1991 | Mar-91 | -0.41   | 1995 | Jan-95 | -1.42   | 1998 | Nov-98 | 0.33    | 2002 | Sep-02 | -1.28   |
| 1979 | Oct-79 | 0.68    | 1983 | Aug-83 | -0.47   | 1987 | Jun-87 | -0.41   | 1991 | Apr-91 | -0.45   | 1995 | Feb-95 | -2.20   | 1998 | Dec-98 | 0.65    | 2002 | Oct-02 | 1.32    |
| 1979 | Nov-79 | 0.95    | 1983 | Sep-83 | 0.49    | 1987 | Jul-87 | -2.88   | 1991 | May-91 | 0.10    | 1995 | Mar-95 | -1.63   | 1999 | Jan-99 | -1.06   | 2002 | Nov-02 | 0.34    |
| 1979 | Dec-79 | -0.37   | 1983 | Oct-83 | -0.94   | 1987 | Aug-87 | 0.94    | 1991 | Jun-91 | 1.20    | 1995 | Apr-95 | 1.47    | 1999 | Feb-99 | -0.72   | 2002 | Dec-02 | -0.50   |
| 1980 | Jan-80 | -2.83   | 1983 | Nov-83 | 0.38    | 1987 | Sep-87 | 0.80    | 1991 | Jul-91 | -0.08   | 1995 | May-95 | 1.62    | 1999 | Mar-99 | -1.29   | 2003 | Jan-03 | -1.23   |
| 1980 | Feb-80 | -2.96   | 1983 | Dec-83 | 0.43    | 1987 | Oct-87 | 1.44    | 1991 | Aug-91 | -1.07   | 1995 | Jun-95 | 1.29    | 1999 | Apr-99 | 1.60    | 2003 | Feb-03 | -2.00   |
| 1980 | Mar-80 | -1.95   | 1984 | Jan-84 | 0.00    | 1987 | Nov-87 | 0.34    | 1991 | Sep-91 | -1.18   | 1995 | Jul-95 | -0.69   | 1999 | May-99 | 1.34    | 2003 | Mar-03 | 0.03    |
| 1980 | Apr-80 | 0.17    | 1984 | Feb-84 | 0.14    | 1987 | Dec-87 | -1.58   | 1991 | Oct-91 | 0.98    | 1995 | Aug-95 | 0.04    | 1999 | Jun-99 | 0.05    | 2003 | Apr-03 | 0.27    |
| 1980 | May-80 | -0.03   | 1984 | Mar-84 | 0.04    | 1988 | Jan-88 | -2.68   | 1991 | Nov-91 | 0.43    | 1995 | Sep-95 | -0.30   | 1999 | Jul-99 | -0.60   | 2003 | May-03 | 0.17    |
| 1980 | Jun-80 | 0.08    | 1984 | Apr-84 | 0.71    | 1988 | Feb-88 | -1.25   | 1991 | Dec-91 | -1.68   | 1995 | Oct-95 | 1.06    | 1999 | Aug-99 | -0.32   | 2003 | Jun-03 | 0.08    |
| 1980 | Jul-80 | -1.14   | 1984 | May-84 | 0.68    | 1988 | Mar-88 | -0.59   | 1992 | Jan-92 | -2.48   | 1995 | Nov-95 | 0.67    | 1999 | Sep-99 | 0.19    | 2003 | Jul-03 | 0.45    |
| 1980 | Aug-80 | -0.50   | 1984 | Jun-84 | 0.11    | 1988 | Apr-88 | 0.21    | 1992 | Feb-92 | -2.99   | 1995 | Dec-95 | -2.68   | 1999 | Oct-99 | 1.56    | 2003 | Aug-03 | -0.28   |
| 1980 | Sep-80 | -0.04   | 1984 | Jul-84 | 0.24    | 1988 | May-88 | -0.27   | 1992 | Mar-92 | -2.66   | 1996 | Jan-96 | -1.79   | 1999 | Nov-99 | 0.25    | 2003 | Sep-03 | 0.09    |
| 1980 | Oct-80 | 0.71    | 1984 | Aug-84 | -2.40   | 1988 | Jun-88 | 0.50    | 1992 | Apr-92 | 0.38    | 1996 | Feb-96 | -1.38   | 1999 | Dec-99 | -1.30   | 2003 | Oct-03 | 0.05    |
| 1980 | Nov-80 | 0.58    | 1984 | Sep-84 | 0.56    | 1988 | Jul-88 | -0.14   | 1992 | May-92 | 0.87    | 1996 | Mar-96 | -2.17   | 2000 | Jan-00 | -0.61   | 2003 | Nov-03 | 0.43    |
| 1980 | Dec-80 | -0.77   | 1984 | Oct-84 | -0.19   | 1988 | Aug-88 | 0.32    | 1992 | Jun-92 | 1.15    | 1996 | Apr-96 | 0.76    | 2000 | Feb-00 | 0.10    | 2003 | Dec-03 | -2.37   |
| 1981 | Jan-81 | -1.44   | 1984 | Nov-84 | 0.53    | 1988 | Sep-88 | 1.10    | 1992 | Jul-92 | 0.51    | 1996 | May-96 | -1.55   | 2000 | Mar-00 | -1.13   | 2004 | Jan-04 | -2.73   |
| 1981 | Feb-81 | -1.96   | 1984 | Dec-84 | -1.57   | 1988 | Oct-88 | -1.47   | 1992 | Aug-92 | -0.53   | 1996 | Jun-96 | 0.07    | 2000 | Apr-00 | -0.26   | 2004 | Feb-04 | -2.32   |
| 1981 | Mar-81 | -1.63   | 1985 | Jan-85 | -1.55   | 1988 | Nov-88 | 0.73    | 1992 | Sep-92 | 0.47    | 1996 | Jul-96 | 0.31    | 2000 | May-00 | -0.26   | 2004 | Mar-04 | -1.25   |
| 1981 | Apr-81 | -0.45   | 1985 | Feb-85 | -1.08   | 1988 | Dec-88 | -1.60   | 1992 | Oct-92 | 1.11    | 1996 | Aug-96 | -0.01   | 2000 | Jun-00 | 0.36    | 2004 | Apr-04 | 0.02    |
| 1981 | May-81 | 0.35    | 1985 | Mar-85 | -1.13   | 1989 | Jan-89 | -2.14   | 1992 | Nov-92 | 1.06    | 1996 | Sep-96 | 1.22    | 2000 | Jul-00 | -1.62   | 2004 | May-04 | 0.62    |
| 1981 | Jun-81 | 0.25    | 1985 | Apr-85 | -1.57   | 1989 | Feb-89 | -2.91   | 1992 | Dec-92 | -1.91   | 1996 | Oct-96 | 0.56    | 2000 | Aug-00 | 0.56    | 2004 | Jun-04 | 0.31    |
| 1981 | Jul-81 | -0.63   | 1985 | May-85 | 0.64    | 1989 | Mar-89 | -1.65   | 1993 | Jan-93 | -2.85   | 1996 | Nov-96 | 0.14    | 2000 | Sep-00 | 0.60    | 2004 | Jul-04 | -0.07   |
| 1981 | Aug-81 | -1.41   | 1985 | Jun-85 | 1.51    | 1989 | Apr-89 | -0.07   | 1993 | Feb-93 | -2.45   | 1996 | Dec-96 | -1.08   | 2000 | Oct-00 | 0.33    | 2004 | Aug-04 | -1.23   |

| year | date   | Average |
|------|--------|---------|------|--------|---------|------|--------|---------|------|--------|---------|
| 2004 | Sep-04 | 0.93    | 2008 | Jul-08 | 1.07    | 2012 | May-12 | -1.18   | 2016 | Mar-16 | -0.91   |
| 2004 | Oct-04 | 1.25    | 2008 | Aug-08 | -0.69   | 2012 | Jun-12 | -0.56   | 2016 | Apr-16 | 0.63    |
| 2004 | Nov-04 | 0.33    | 2008 | Sep-08 | -0.45   | 2012 | Jul-12 | -1.10   | 2016 | May-16 | 3.92    |
| 2004 | Dec-04 | -0.48   | 2008 | Oct-08 | 1.30    | 2012 | Aug-12 | 0.12    | 2016 | Jun-16 | -0.61   |
| 2005 | Jan-05 | -1.67   | 2008 | Nov-08 | 0.05    | 2012 | Sep-12 | -0.75   | 2016 | Jul-16 | -1.27   |
| 2005 | Feb-05 | -1.74   | 2008 | Dec-08 | -1.20   | 2012 | Oct-12 | 1.87    | 2016 | Aug-16 | -1.96   |
| 2005 | Mar-05 | -0.15   | 2009 | Jan-09 | -2.11   | 2012 | Nov-12 | 0.42    | 2016 | Sep-16 | -2.09   |
| 2005 | Apr-05 | 0.14    | 2009 | Feb-09 | -2.77   | 2012 | Dec-12 | -0.05   | 2016 | Oct-16 | -0.29   |
| 2005 | May-05 | -0.44   | 2009 | Mar-09 | 0.54    | 2013 | Jan-13 | -1.69   | 2016 | Nov-16 | 0.44    |
| 2005 | Jun-05 | 0.30    | 2009 | Apr-09 | 0.00    | 2013 | Feb-13 | -0.96   | 2016 | Dec-16 | -2.26   |
| 2005 | Jul-05 | -0.09   | 2009 | May-09 | 0.66    | 2013 | Mar-13 | 0.12    | 2017 | Jan-17 | -1.94   |
| 2005 | Aug-05 | -1.33   | 2009 | Jun-09 | 0.54    | 2013 | Apr-13 | -0.47   | 2017 | Feb-17 | -2.64   |
| 2005 | Sep-05 | -0.43   | 2009 | Jul-09 | -0.56   | 2013 | May-13 | 1.19    | 2017 | Mar-17 | 0.38    |

|      |        |       |      |        |       |      |        |       |      |        |       |
|------|--------|-------|------|--------|-------|------|--------|-------|------|--------|-------|
| 2005 | Oct-05 | 1.58  | 2009 | Aug-09 | 0.25  | 2013 | Jun-13 | 1.47  | 2017 | Apr-17 | -0.87 |
| 2005 | Nov-05 | 1.72  | 2009 | Sep-09 | 0.30  | 2013 | Jul-13 | 0.49  | 2017 | May-17 | 1.68  |
| 2005 | Dec-05 | -0.69 | 2009 | Oct-09 | 0.68  | 2013 | Aug-13 | -1.07 | 2017 | Jun-17 | -0.08 |
| 2006 | Jan-06 | -1.16 | 2009 | Nov-09 | 0.58  | 2013 | Sep-13 | 0.65  | 2017 | Jul-17 | -1.17 |
| 2006 | Feb-06 | -1.37 | 2009 | Dec-09 | -0.01 | 2013 | Oct-13 | 0.32  | 2017 | Aug-17 | -0.35 |
| 2006 | Mar-06 | 0.18  | 2010 | Jan-10 | -1.86 | 2013 | Nov-13 | -0.13 | 2017 | Sep-17 | 1.48  |
| 2006 | Apr-06 | -0.58 | 2010 | Feb-10 | -2.73 | 2013 | Dec-13 | -2.42 | 2017 | Oct-17 | 1.39  |
| 2006 | May-06 | 0.47  | 2010 | Mar-10 | -0.77 | 2014 | Jan-14 | -2.10 | 2017 | Nov-17 | 0.44  |
| 2006 | Jun-06 | 0.26  | 2010 | Apr-10 | 1.25  | 2014 | Feb-14 | -2.21 | 2017 | Dec-17 | -0.65 |
| 2006 | Jul-06 | -0.75 | 2010 | May-10 | 1.68  | 2014 | Mar-14 | -1.55 | 2018 | Jan-18 | -2.41 |
| 2006 | Aug-06 | 0.50  | 2010 | Jun-10 | 0.62  | 2014 | Apr-14 | 0.60  | 2018 | Feb-18 | -0.89 |
| 2006 | Sep-06 | -0.66 | 2010 | Jul-10 | 0.06  | 2014 | May-14 | -0.75 | 2018 | Mar-18 | -0.67 |
| 2006 | Oct-06 | 2.23  | 2010 | Aug-10 | -0.67 | 2014 | Jun-14 | 1.04  | 2018 | Apr-18 | 0.87  |
| 2006 | Nov-06 | 1.85  | 2010 | Sep-10 | 0.63  | 2014 | Jul-14 | -0.66 | 2018 | May-18 | 2.06  |
| 2006 | Dec-06 | -1.11 | 2010 | Oct-10 | 0.42  | 2014 | Aug-14 | 0.81  | 2018 | Jun-18 | 0.81  |
| 2007 | Jan-07 | -1.93 | 2010 | Nov-10 | 1.85  | 2014 | Sep-14 | 0.82  | 2018 | Jul-18 | -0.99 |
| 2007 | Feb-07 | -2.72 | 2010 | Dec-10 | 0.27  | 2014 | Oct-14 | 1.50  | 2018 | Aug-18 | -0.76 |
| 2007 | Mar-07 | -1.71 | 2011 | Jan-11 | -1.01 | 2014 | Nov-14 | 0.16  | 2018 | Sep-18 | -0.13 |
| 2007 | Apr-07 | 0.84  | 2011 | Feb-11 | -1.56 | 2014 | Dec-14 | 0.98  | 2018 | Oct-18 | 1.57  |
| 2007 | May-07 | -0.01 | 2011 | Mar-11 | -1.07 | 2015 | Jan-15 | -2.22 | 2018 | Nov-18 | 0.59  |
| 2007 | Jun-07 | -0.24 | 2011 | Apr-11 | 1.23  | 2015 | Feb-15 | -0.83 | 2018 | Dec-18 | -1.32 |
| 2007 | Jul-07 | -0.36 | 2011 | May-11 | 1.29  | 2015 | Mar-15 | -0.17 | 2019 | Jan-19 | -2.70 |
| 2007 | Aug-07 | 0.35  | 2011 | Jun-11 | -0.56 | 2015 | Apr-15 | 0.84  | 2019 | Feb-19 | -0.41 |
| 2007 | Sep-07 | 0.25  | 2011 | Jul-11 | -0.94 | 2015 | May-15 | -0.03 | 2019 | Mar-19 | -2.00 |
| 2007 | Oct-07 | 0.73  | 2011 | Aug-11 | 0.17  | 2015 | Jun-15 | 0.47  | 2019 | Apr-19 | 0.02  |
| 2007 | Nov-07 | -0.31 | 2011 | Sep-11 | 0.14  | 2015 | Jul-15 | -1.31 | 2019 | May-19 | -1.33 |
| 2007 | Dec-07 | -1.63 | 2011 | Oct-11 | 0.41  | 2015 | Aug-15 | -0.53 | 2019 | Jun-19 | 0.36  |
| 2008 | Jan-08 | -2.34 | 2011 | Nov-11 | -0.60 | 2015 | Sep-15 | 0.81  | 2019 | Jul-19 | -0.66 |
| 2008 | Feb-08 | -0.17 | 2011 | Dec-11 | -1.49 | 2015 | Oct-15 | 1.35  | 2019 | Aug-19 | 0.85  |
| 2008 | Mar-08 | 0.57  | 2012 | Jan-12 | -1.71 | 2015 | Nov-15 | 1.12  | 2019 | Sep-19 | 1.26  |
| 2008 | Apr-08 | 2.08  | 2012 | Feb-12 | -0.99 | 2015 | Dec-15 | 0.20  | 2019 | Oct-19 | 1.55  |
| 2008 | May-08 | 1.15  | 2012 | Mar-12 | -0.78 | 2016 | Jan-16 | -2.17 | 2019 | Nov-19 | 1.21  |
| 2008 | Jun-08 | 0.82  | 2012 | Apr-12 | 0.76  | 2016 | Feb-16 | -1.92 | 2019 | Dec-19 | -0.70 |

**Table S2: Temporal Changes of RAI in Seven Stations from 1951 to 2019.**

| year | month | Colombo | Deraniyagala | Glencuse | Hanwell | Holombuwa | Kithulgala | Norwood | year | month | Colombo | Deraniyagala | Glencuse | Hanwell | Holombuwa | Kithulgala | Norwood |
|------|-------|---------|--------------|----------|---------|-----------|------------|---------|------|-------|---------|--------------|----------|---------|-----------|------------|---------|
| 1951 | 1     | -1.90   | -2.30        | -1.97    | -1.90   | -2.03     | -2.32      | -2.36   | 1985 | 7     | -2.68   | -0.95        | -1.94    | -1.87   | -1.06     | -1.01      | -0.45   |
| 1951 | 2     | -2.52   | -2.70        | -2.44    | -2.40   | -2.62     | -2.71      | -2.78   | 1985 | 8     | -0.09   | -0.87        | -1.08    | -0.95   | -1.12     | -0.92      | -0.42   |
| 1951 | 3     | -2.57   | -2.86        | -2.73    | -2.72   | -2.73     | -2.87      | -2.85   | 1985 | 9     | 0.49    | -0.17        | 0.06     | 0.13    | -0.31     | -0.24      | -0.53   |
| 1951 | 4     | -0.23   | -2.18        | -1.07    | -0.94   | -0.86     | -2.20      | -2.57   | 1985 | 10    | 0.85    | 0.73         | 0.78     | 0.90    | 0.89      | 0.80       | 0.47    |
| 1951 | 5     | -2.40   | -2.49        | -2.28    | -2.23   | -2.52     | -2.51      | -2.62   | 1985 | 11    | 0.33    | 0.19         | 0.41     | 0.51    | 0.87      | 0.18       | 0.23    |
| 1951 | 6     | -2.47   | -1.39        | -2.31    | -2.26   | -1.56     | -1.43      | -1.03   | 1985 | 12    | 0.03    | 0.25         | 0.18     | 0.26    | 0.03      | 0.03       | 0.18    |
| 1951 | 7     | -2.77   | -2.57        | -2.76    | -2.75   | -2.53     | -2.58      | -2.42   | 1986 | 1     | -0.62   | -0.11        | -0.96    | -0.81   | 0.50      | -0.18      | 0.95    |
| 1951 | 8     | -2.99   | -2.94        | -3.02    | -3.02   | -2.86     | -2.94      | -2.86   | 1986 | 2     | -1.72   | -0.33        | -0.46    | -0.28   | 0.13      | -0.40      | -0.24   |
| 1951 | 9     | -2.14   | -2.35        | -2.22    | -2.16   | -1.97     | -2.37      | -2.41   | 1986 | 3     | -1.67   | -1.41        | -1.23    | -1.10   | -1.15     | -1.45      | -0.87   |
| 1951 | 10    | -2.47   | -2.61        | -2.62    | -2.60   | -2.36     | -2.63      | -2.56   | 1986 | 4     | 0.18    | 0.04         | 0.11     | 0.19    | 0.02      | 0.01       | 0.03    |
| 1951 | 11    | 0.48    | -1.86        | -0.25    | -0.06   | -0.37     | -1.89      | -2.40   | 1986 | 5     | 0.25    | -0.66        | 0.13     | 0.21    | -1.24     | -0.72      | -1.32   |
| 1951 | 12    | -2.58   | -2.68        | -2.54    | -2.51   | -2.37     | -2.69      | -2.69   | 1986 | 6     | -1.95   | -0.67        | -1.80    | -1.72   | -0.93     | -0.73      | -0.28   |
| 1952 | 1     | -2.46   | -2.55        | -2.45    | -2.41   | -2.16     | -2.57      | -2.53   | 1986 | 7     | -2.83   | -1.72        | -2.40    | -2.36   | -1.65     | -1.76      | -1.23   |
| 1952 | 2     | -1.21   | -2.62        | -2.03    | -1.96   | -2.16     | -2.63      | -2.75   | 1986 | 8     | -1.75   | 0.10         | -0.73    | -0.57   | 0.05      | 0.09       | 0.20    |
| 1952 | 3     | -2.80   | -2.79        | -2.75    | -2.73   | -2.78     | -2.80      | -2.76   | 1986 | 9     | -0.90   | 0.66         | 0.48     | 0.58    | 0.29      | 0.72       | 0.38    |
| 1952 | 4     | -2.37   | -2.55        | -2.49    | -2.45   | -2.31     | -2.56      | -2.51   | 1986 | 10    | -0.33   | 0.38         | 0.31     | 0.40    | 0.61      | 0.41       | 0.72    |
| 1952 | 5     | -2.46   | -1.46        | -2.28    | -2.24   | -1.42     | -1.50      | -1.19   | 1986 | 11    | -2.03   | -1.07        | -1.15    | -1.02   | -1.06     | -1.12      | -1.11   |
| 1952 | 6     | -2.88   | -2.54        | -2.86    | -2.85   | -2.52     | -2.56      | -2.36   | 1986 | 12    | 0.11    | -0.91        | -0.75    | -0.59   | -1.50     | -0.96      | -0.74   |
| 1952 | 7     | -2.86   | -2.62        | -2.81    | -2.80   | -2.45     | -2.63      | -2.49   | 1987 | 1     | -1.39   | -1.73        | -1.80    | -1.71   | -1.74     | -1.77      | -1.26   |
| 1952 | 8     | -2.89   | -2.78        | -2.91    | -2.90   | -2.66     | -2.79      | -2.68   | 1987 | 2     | -3.00   | -2.98        | -3.00    | -3.00   | -2.95     | -2.98      | -2.83   |
| 1952 | 9     | -2.94   | -2.75        | -2.98    | -2.98   | -2.70     | -2.76      | -2.60   | 1987 | 3     | -1.80   | -1.90        | -1.77    | -1.68   | -2.06     | -1.93      | -1.93   |
| 1952 | 10    | -2.23   | -2.32        | -2.42    | -2.38   | -2.09     | -2.34      | -2.24   | 1987 | 4     | -0.06   | -0.31        | 0.03     | 0.10    | 0.08      | -0.38      | -0.12   |
| 1952 | 11    | -2.02   | -2.64        | -2.27    | -2.26   | -2.26     | -2.65      | -2.74   | 1987 | 5     | 0.08    | 0.16         | 0.15     | 0.24    | 0.25      | 0.16       | 0.23    |
| 1952 | 12    | -2.76   | -2.89        | -2.88    | -2.87   | -2.77     | -2.90      | -2.82   | 1987 | 6     | -1.09   | -0.06        | -0.64    | -0.48   | 0.02      | -0.13      | -0.45   |
| 1953 | 1     | -2.35   | -2.72        | -2.48    | -2.44   | -2.63     | -2.73      | -2.75   | 1987 | 7     | -2.80   | -2.91        | -2.86    | -2.85   | -2.90     | -2.92      | -2.93   |
| 1953 | 2     | -2.50   | -2.79        | -2.59    | -2.56   | -2.59     | -2.80      | -2.84   | 1987 | 8     | 1.18    | 0.95         | 1.25     | 1.40    | 0.45      | 1.05       | 0.31    |
| 1953 | 3     | -2.70   | -2.87        | -2.78    | -2.77   | -2.83     | -2.88      | -2.86   | 1987 | 9     | 1.74    | 0.40         | 1.03     | 1.17    | 0.59      | 0.42       | 0.21    |
| 1953 | 4     | -2.26   | -2.55        | -2.46    | -2.42   | -2.15     | -2.56      | -2.52   | 1987 | 10    | 1.72    | 1.03         | 1.64     | 1.81    | 1.55      | 1.14       | 1.21    |
| 1953 | 5     | -2.94   | -3.06        | -3.01    | -3.01   | -3.03     | -3.06      | -3.03   | 1987 | 11    | 0.18    | 0.26         | 0.35     | 0.45    | 0.50      | 0.26       | 0.39    |
| 1953 | 6     | -2.80   | -2.63        | -2.75    | -2.73   | -2.48     | -2.65      | -2.59   | 1987 | 12    | -0.77   | -1.99        | -1.75    | -1.66   | -1.06     | -2.02      | -1.83   |
| 1953 | 7     | -1.21   | -1.87        | -1.43    | -1.32   | -1.82     | -1.90      | -2.07   | 1988 | 1     | -2.95   | -2.57        | -2.73    | -2.71   | -2.76     | -2.58      | -2.44   |
| 1953 | 8     | -2.98   | -2.92        | -3.01    | -3.01   | -2.87     | -2.93      | -2.83   | 1988 | 2     | -1.96   | -1.00        | -1.23    | -1.11   | -1.24     | -1.05      | -1.17   |
| 1953 | 9     | -2.80   | -2.66        | -2.77    | -2.76   | -2.43     | -2.68      | -2.60   | 1988 | 3     | 0.12    | -0.88        | -0.31    | -0.11   | -0.98     | -0.93      | -1.06   |
| 1953 | 10    | -1.22   | -2.25        | -1.51    | -1.40   | -1.37     | -2.27      | -2.59   | 1988 | 4     | 0.01    | 0.08         | 0.04     | 0.12    | 0.67      | 0.07       | 0.45    |
| 1953 | 11    | 0.15    | -2.16        | -0.79    | -0.63   | -1.01     | -2.19      | -2.67   | 1988 | 5     | -0.60   | 0.04         | -0.24    | -0.04   | -0.44     | 0.02       | -0.61   |
| 1953 | 12    | -2.68   | -2.78        | -2.79    | -2.77   | -2.55     | -2.79      | -2.69   | 1988 | 6     | 0.90    | 0.48         | 0.61     | 0.72    | 0.22      | 0.52       | 0.05    |
| 1954 | 1     | -0.64   | -2.44        | -1.50    | -1.39   | -1.97     | -2.45      | -2.73   | 1988 | 7     | -1.33   | 0.28         | -0.65    | -0.48   | 0.33      | 0.29       | 0.58    |
| 1954 | 2     | -2.65   | -2.86        | -2.72    | -2.70   | -2.82     | -2.87      | -2.87   | 1988 | 8     | -0.99   | 0.58         | 0.35     | 0.44    | 0.72      | 0.64       | 0.48    |

|      |    |       |       |       |       |       |       |       |      |    |       |       |       |       |       |       |       |
|------|----|-------|-------|-------|-------|-------|-------|-------|------|----|-------|-------|-------|-------|-------|-------|-------|
| 1954 | 3  | -0.86 | -2.42 | -1.59 | -1.49 | -2.05 | -2.44 | -2.71 | 1988 | 9  | 1.02  | 1.09  | 1.40  | 1.56  | 0.78  | 1.21  | 0.63  |
| 1954 | 4  | -1.79 | -2.46 | -1.92 | -1.85 | -1.79 | -2.48 | -2.67 | 1988 | 10 | -1.07 | -1.60 | -1.32 | -1.20 | -1.61 | -1.63 | -1.85 |
| 1954 | 5  | -2.19 | -2.62 | -2.39 | -2.35 | -2.37 | -2.64 | -2.70 | 1988 | 11 | 1.11  | 0.42  | 0.64  | 0.75  | 1.05  | 0.46  | 0.70  |
| 1954 | 6  | -2.95 | -2.84 | -2.95 | -2.85 | -2.82 | -2.85 | -2.76 | 1988 | 12 | -1.24 | -1.78 | -1.79 | -1.70 | -1.57 | -1.82 | -1.78 |
| 1954 | 7  | -2.15 | -2.53 | -2.28 | -2.23 | -2.49 | -2.55 | -2.61 | 1989 | 1  | -2.41 | -2.23 | -2.52 | -2.49 | -1.66 | -2.25 | -1.42 |
| 1954 | 8  | -2.74 | -2.30 | -2.66 | -2.64 | -2.19 | -2.33 | -2.12 | 1989 | 2  | -2.90 | -2.94 | -2.96 | -2.96 | -2.87 | -2.95 | -2.80 |
| 1954 | 9  | -2.94 | -2.88 | -2.88 | -2.88 | -2.78 | -2.89 | -2.86 | 1989 | 3  | -0.60 | -1.92 | -1.62 | -1.53 | -1.86 | -1.95 | -2.07 |
| 1954 | 10 | -0.12 | -1.74 | -0.69 | -0.53 | -0.64 | -1.77 | -2.18 | 1989 | 4  | 0.80  | -0.40 | 0.36  | 0.46  | 0.07  | -0.47 | -1.28 |
| 1954 | 11 | -2.44 | -2.75 | -2.57 | -2.55 | -2.48 | -2.76 | -2.77 | 1989 | 5  | 1.15  | 0.36  | 0.35  | 0.45  | 0.04  | 0.38  | 0.35  |
| 1954 | 12 | -1.56 | -2.33 | -2.06 | -1.99 | -1.69 | -2.35 | -2.29 | 1989 | 6  | 0.18  | 0.81  | 0.55  | 0.66  | 1.01  | 0.90  | 0.48  |
| 1955 | 1  | -1.25 | -2.30 | -1.68 | -1.59 | -1.85 | -2.32 | -2.46 | 1989 | 7  | -0.73 | 0.75  | -0.28 | -0.09 | 0.86  | 0.82  | 1.68  |
| 1955 | 2  | -2.75 | -2.69 | -2.68 | -2.66 | -2.58 | -2.70 | -2.63 | 1989 | 8  | -2.19 | -0.55 | -1.75 | -1.67 | -0.83 | -0.61 | -0.43 |
| 1955 | 3  | -2.52 | -2.72 | -2.53 | -2.49 | -2.68 | -2.74 | -2.77 | 1989 | 9  | -0.14 | 0.35  | 0.13  | 0.21  | 0.19  | 0.37  | 0.45  |
| 1955 | 4  | -0.68 | -2.12 | -1.20 | -1.07 | -1.02 | -2.14 | -2.47 | 1989 | 10 | 1.42  | 0.75  | 1.02  | 1.16  | 1.10  | 0.83  | 0.73  |
| 1955 | 5  | -0.94 | -2.23 | -1.85 | -1.77 | -1.99 | -2.25 | -2.33 | 1989 | 11 | 0.54  | 0.29  | 0.49  | 0.59  | 0.92  | 0.30  | 0.42  |
| 1955 | 6  | -2.84 | -2.09 | -2.83 | -2.82 | -2.12 | -2.12 | -1.73 | 1989 | 12 | -2.48 | -2.16 | -2.23 | -2.18 | -2.33 | -2.18 | -1.79 |
| 1955 | 7  | -2.95 | -2.83 | -2.96 | -2.96 | -2.80 | -2.84 | -2.72 | 1990 | 1  | -0.01 | -1.65 | -1.30 | -1.18 | -1.56 | -1.36 | -1.19 |
| 1955 | 8  | -2.93 | -2.84 | -2.91 | -2.91 | -2.69 | -2.85 | -2.79 | 1990 | 2  | -2.40 | -2.62 | -2.27 | -2.22 | -2.82 | -2.62 | -1.97 |
| 1955 | 9  | -2.15 | -2.43 | -2.47 | -2.43 | -2.20 | -2.45 | -2.35 | 1990 | 3  | 0.01  | 0.73  | 0.47  | -0.29 | -1.25 | 0.28  | 0.32  |
| 1955 | 10 | -2.57 | -2.66 | -2.61 | -2.59 | -2.22 | -2.67 | -2.66 | 1990 | 4  | 0.98  | -0.86 | 0.40  | 0.49  | -1.77 | -0.96 | -0.86 |
| 1955 | 11 | -0.57 | -2.40 | -1.54 | -1.44 | -1.50 | -2.42 | -2.66 | 1990 | 5  | 0.75  | 0.41  | 0.52  | 0.62  | 0.98  | 1.89  | 1.32  |
| 1955 | 12 | -1.66 | -2.70 | -2.06 | -1.99 | -1.61 | -2.72 | -2.95 | 1990 | 6  | 0.01  | 0.33  | -0.45 | -0.27 | 1.21  | 0.46  | 0.55  |
| 1956 | 1  | -2.63 | -2.90 | -2.72 | -2.70 | -2.80 | -2.91 | -2.94 | 1990 | 7  | 0.12  | -0.26 | 0.03  | 0.10  | -0.13 | 0.62  | -0.24 |
| 1956 | 2  | -2.85 | -3.01 | -2.91 | -2.91 | -2.96 | -3.01 | -3.00 | 1990 | 8  | -2.71 | -2.40 | -2.66 | -2.64 | -2.42 | -1.72 | -0.14 |
| 1956 | 3  | -2.80 | -2.89 | -2.83 | -2.82 | -2.86 | -2.90 | -2.87 | 1990 | 9  | -2.52 | -1.83 | -2.40 | -2.36 | -2.44 | -2.22 | 0.95  |
| 1956 | 4  | -2.36 | -2.74 | -2.57 | -2.54 | -2.60 | -2.75 | -2.75 | 1990 | 10 | 1.02  | 0.73  | 0.66  | 0.77  | 1.30  | 0.87  | 1.32  |
| 1956 | 5  | -2.66 | -2.80 | -2.78 | -2.77 | -2.81 | -2.77 | -2.77 | 1990 | 11 | 0.39  | 0.93  | 0.84  | 0.97  | 0.72  | 0.53  | 0.56  |
| 1956 | 6  | -2.65 | -1.77 | -2.67 | -2.65 | -1.66 | -1.81 | -1.33 | 1990 | 12 | -0.07 | -1.45 | -1.00 | -0.85 | -0.39 | -0.83 | -0.56 |
| 1956 | 7  | -2.97 | -2.80 | -2.98 | -2.98 | -2.73 | -2.81 | -2.66 | 1991 | 1  | -1.71 | 0.14  | -1.36 | -1.24 | 0.11  | -1.63 | -1.73 |
| 1956 | 8  | -2.51 | -2.62 | -2.54 | -2.51 | -2.62 | -2.63 | -2.62 | 1991 | 2  | -2.10 | -2.19 | -1.95 | -1.88 | -1.81 | -1.53 | -2.32 |
| 1956 | 9  | -2.79 | -2.81 | -2.81 | -2.80 | -2.72 | -2.82 | -2.77 | 1991 | 3  | -0.60 | -0.87 | -0.50 | -0.33 | 0.94  | -0.24 | -1.26 |
| 1956 | 10 | -2.07 | -2.54 | -2.36 | -2.32 | -2.06 | -2.56 | -2.57 | 1991 | 4  | -0.67 | 0.15  | -0.28 | -0.09 | -1.38 | -0.14 | -0.73 |
| 1956 | 11 | -0.47 | -2.14 | -1.46 | -1.36 | -1.07 | -2.16 | -2.29 | 1991 | 5  | 0.71  | 0.35  | 0.30  | 0.39  | -1.38 | 0.32  | 0.01  |
| 1956 | 12 | -1.66 | -2.61 | -2.07 | -2.01 | -2.23 | -2.62 | -2.76 | 1991 | 6  | 0.67  | 1.40  | 0.69  | 0.80  | 1.17  | 1.98  | 1.66  |
| 1957 | 1  | -2.80 | -2.86 | -2.80 | -2.79 | -2.80 | -2.87 | -2.83 | 1991 | 7  | -1.02 | 0.25  | -0.41 | -0.22 | 0.25  | 0.59  | 0.03  |
| 1957 | 2  | -2.53 | -2.80 | -2.62 | -2.60 | -2.68 | -2.81 | -2.83 | 1991 | 8  | -1.54 | -0.83 | -1.52 | -1.42 | -1.72 | -0.05 | -0.42 |
| 1957 | 3  | -2.67 | -2.94 | -2.84 | -2.83 | -2.86 | -2.95 | -2.92 | 1991 | 9  | -1.16 | -1.19 | -1.11 | -0.97 | -1.94 | -0.17 | -1.70 |
| 1957 | 4  | -2.76 | -2.88 | -2.85 | -2.84 | -2.78 | -2.89 | -2.83 | 1991 | 10 | 0.80  | 0.84  | 0.79  | 0.91  | 1.30  | 0.94  | 1.15  |
| 1957 | 5  | -1.82 | -2.31 | -2.11 | -2.05 | -2.03 | -2.33 | -2.39 | 1991 | 11 | 0.58  | 0.25  | 0.15  | 0.23  | 1.13  | 0.19  | 0.49  |
| 1957 | 6  | -2.63 | -2.47 | -2.71 | -2.65 | -2.49 | -2.36 | -1.70 | 1991 | 12 | -2.26 | -1.86 | -1.42 | -1.31 | -2.26 | -2.22 | -1.01 |
| 1957 | 7  | -0.65 | -1.57 | -1.05 | -0.91 | -1.47 | -1.61 | -2.31 | 1992 | 1  | -2.68 | -1.61 | -2.59 | -2.56 | -2.95 | -2.33 | -2.64 |
| 1957 | 8  | -2.54 | -2.62 | -2.53 | -2.50 | -2.52 | -2.64 | -2.68 | 1992 | 2  | -2.94 | -3.06 | -2.93 | -2.92 | -3.01 | -3.02 | -3.03 |
| 1957 | 9  | -2.87 | -2.92 | -2.89 | -2.89 | -2.82 | -2.92 | -2.89 | 1992 | 3  | -2.99 | -2.92 | -2.86 | -2.80 | -1.70 | -2.68 | -2.69 |
| 1957 | 10 | 0.10  | -1.41 | 0.06  | 0.13  | -0.28 | -1.45 | -2.46 | 1992 | 4  | -0.52 | 0.64  | -0.45 | -0.08 | 1.15  | 0.34  | 1.57  |
| 1957 | 11 | 1.17  | 0.17  | 1.16  | 1.30  | 0.80  | 0.17  | -1.93 | 1992 | 5  | 1.62  | 0.81  | 1.25  | 1.37  | 0.01  | 0.63  | 0.38  |
| 1957 | 12 | 2.00  | 0.74  | 2.00  | 2.20  | 0.82  | 0.82  | -1.11 | 1992 | 6  | 2.17  | 0.41  | 0.97  | 1.18  | 0.59  | 1.44  | 1.28  |
| 1958 | 1  | -1.99 | -2.42 | -1.99 | -1.92 | -2.17 | -2.44 | -2.75 | 1992 | 7  | 0.19  | 0.78  | 0.06  | 0.01  | -0.94 | 1.41  | 2.02  |
| 1958 | 2  | -2.12 | -2.62 | -2.23 | -2.17 | -2.45 | -2.64 | -2.92 | 1992 | 8  | -1.84 | 0.14  | -1.31 | -1.09 | -0.97 | 0.92  | 0.46  |
| 1958 | 3  | -1.28 | -2.08 | -1.51 | -1.40 | -1.86 | -2.10 | -2.62 | 1992 | 9  | 0.74  | 0.37  | 0.71  | 0.83  | 0.33  | 0.72  | -0.43 |
| 1958 | 4  | -0.98 | -1.93 | -1.07 | -0.93 | -1.60 | -1.96 | -2.55 | 1992 | 10 | 0.18  | 1.29  | 0.35  | 0.43  | 1.33  | 1.36  | 2.83  |
| 1958 | 5  | 1.36  | 0.01  | 1.03  | 1.17  | 0.10  | -0.05 | -2.64 | 1992 | 11 | 1.16  | 0.83  | 0.89  | 1.00  | 0.88  | 1.07  | 1.59  |
| 1958 | 6  | 0.11  | -1.15 | -0.30 | -0.10 | -1.14 | -1.20 | -2.19 | 1992 | 12 | -1.72 | -1.99 | -1.91 | -1.84 | -2.02 | -2.50 | -1.38 |
| 1958 | 7  | -2.05 | -2.28 | -1.90 | -1.82 | -2.36 | -2.30 | -2.74 | 1993 | 1  | -2.99 | -2.55 | -2.94 | -2.94 | -2.82 | -2.89 | -2.80 |
| 1958 | 8  | -1.51 | -1.91 | -1.58 | -1.48 | -1.68 | -1.94 | -2.39 | 1993 | 2  | -2.75 | -2.72 | -2.63 | -2.60 | -2.86 | -1.96 | -1.64 |
| 1958 | 9  | -2.27 | -2.60 | -2.28 | -2.23 | -2.39 | -2.61 | -2.84 | 1993 | 3  | -1.37 | -0.02 | -1.81 | -1.73 | 0.46  | -0.90 | -1.24 |
| 1958 | 10 | 0.78  | -0.26 | 0.63  | 0.74  | 0.31  | -0.33 | -2.17 | 1993 | 4  | 0.28  | 0.40  | 0.05  | 0.12  | 0.56  | -0.71 | 0.85  |
| 1958 | 11 | 0.34  | -1.25 | 0.10  | 0.18  | -0.28 | -1.30 | -2.48 | 1993 | 5  | 2.66  | 1.53  | 1.92  | 2.11  | 0.73  | 2.63  | 2.54  |
| 1958 | 12 | -0.04 | -1.67 | -0.48 | -0.30 | -1.18 | -1.70 | -2.74 | 1993 | 6  | -1.12 | 2.00  | 0.55  | 0.65  | -1.60 | 2.55  | 3.82  |
| 1959 | 1  | -2.32 | -2.79 | -2.47 | -2.44 | -2.63 | -2.81 | -2.89 | 1993 | 7  | -2.36 | 0.10  | -1.50 | -1.39 | -0.43 | 0.47  | 2.60  |
| 1959 | 2  | -2.66 | -2.79 | -2.66 | -2.63 | -2.68 | -2.80 | -2.81 | 1993 | 8  | -2.37 | -1.09 | -2.11 | -2.05 | -1.24 | 0.12  | -0.24 |
| 1959 | 3  | -2.99 | -3.03 | -3.02 | -3.03 | -2.99 | -3.04 | -3.00 | 1993 | 9  | 0.86  | 0.22  | 0.52  | 0.62  | 0.50  | 0.21  | -1.56 |
| 1959 | 4  | -2.36 | -2.57 | -2.51 | -2.48 | -2.33 | -2.58 | -2.52 | 1993 | 10 | 1.70  | 1.57  | 1.58  | 1.75  | 2.43  | 1.79  | 2.34  |
| 1959 | 5  | -1.49 | -2.40 | -1.80 | -1.72 | -2.06 | -2.42 | -2.64 | 1993 | 11 | 0.65  | 1.15  | 0.53  | 0.64  | 1.70  | 1.05  | 1.04  |
| 1959 | 6  | -2.12 | -1.84 | -2.09 | -2.02 | -1.75 | -1.87 | -1.75 | 1993 | 12 | 0.45  | 0.19  | 0.10  | 0.18  | 0.43  | 0.09  | 0.88  |
| 1959 | 7  | -2.79 | -2.50 | -2.84 | -2.83 | -2.48 | -2.51 | -2.27 | 1994 | 1  | -1.61 | -2.49 | -1.76 | -1.67 | -2.01 | -1.98 | -1.24 |
| 1959 | 8  | -2.62 | -2.67 | -2.54 | -2.51 | -2.61 | -2.69 | -2.74 | 1994 | 2  | -1.08 | -0.73 | -1.70 | -1.60 | -0.94 | -1.09 | -1.90 |
| 1959 | 9  | -2.64 | -2.62 | -2.57 | -2.54 | -2.65 | -2.63 | -2.62 | 1994 | 3  | -0.80 | -1.53 | -1.44 | -1.33 | -1.23 | -1.96 | -3.03 |
| 1959 | 10 | -1.19 | -2.36 | -1.79 | -1.71 | -1.34 | -2.38 | -2.57 | 1994 | 4  | -1.34 | 0.12  | -1.23 | -1.10 | 0.17  | -0.72 | 0.11  |
| 1959 | 11 | -0.48 | -2.16 | -1.06 | -0.92 | -1.20 | -2.18 | -2.56 | 1994 | 5  | 1.58  | 0.79  | 1.06  | 1.19  | 0.87  | 1.03  | 0.27  |
| 1959 | 12 | -1.48 | -2.60 | -1.81 | -1.72 | -2.33 | -2.62 | -2.85 | 1994 | 6  | -1.66 | -0.95 | -1.33 | -1.22 | -2.00 | 0.21  | 0.78  |
| 1960 | 1  | -2.87 | -2.83 | -2.89 | -2.89 | -2.77 | -2.84 | -2.72 | 1994 | 7  | -1.28 | 0.06  | -0.66 | -0.50 | -1.76 | 0.99  | 0.87  |
| 1960 | 2  | -1.26 | -2.18 | -1.34 | -1.23 | -1.86 | -2.20 | -2.50 | 1994 | 8  | -1.80 | -1.10 | -1.61 | -1.52 | -1.70 | 0.18  | 0.01  |
| 1960 | 3  | -2.50 | -2.93 | -2.70 | -2.68 | -2.89 | -2.94 | -2.98 | 1994 | 9  | 1.00  | 0.57  | 0.90  | 1.03  | 0.18  | 0.78  | -0.26 |
| 1960 | 4  | -1.72 | -2.53 | -2.23 | -2.18 | -2.18 | -2.55 | -2.57 | 1994 | 10 | 1.56  | 1.52  | 1.51  | 1.67  | 3.01  | 2.08  | 0.76  |

|      |    |       |       |       |       |       |       |       |      |    |       |       |       |       |       |       |       |
|------|----|-------|-------|-------|-------|-------|-------|-------|------|----|-------|-------|-------|-------|-------|-------|-------|
| 1960 | 5  | -2.08 | -2.53 | -2.41 | -2.37 | -2.32 | -2.55 | -2.56 | 1994 | 11 | 1.30  | 1.08  | 0.74  | 0.86  | 1.08  | 0.70  | 1.67  |
| 1960 | 6  | -2.93 | -2.76 | -2.93 | -2.93 | -2.76 | -2.77 | -2.66 | 1994 | 12 | -2.50 | -2.11 | -2.60 | -2.57 | -2.62 | -2.43 | -2.34 |
| 1960 | 7  | -1.58 | -1.93 | -1.53 | -1.43 | -1.24 | -1.96 | -2.18 | 1995 | 1  | -1.49 | -1.58 | -1.34 | -1.23 | -0.67 | -1.95 | -1.66 |
| 1960 | 8  | -2.88 | -2.73 | -2.89 | -2.89 | -2.74 | -2.74 | -2.61 | 1995 | 2  | -2.79 | -1.39 | -2.47 | -2.43 | -1.68 | -2.15 | -2.48 |
| 1960 | 9  | -2.72 | -2.25 | -2.71 | -2.69 | -2.25 | -2.27 | -2.01 | 1995 | 3  | -2.50 | -1.01 | -1.98 | -1.91 | -1.62 | -1.55 | -0.87 |
| 1960 | 10 | 0.40  | -1.79 | 0.01  | 0.08  | -0.64 | -1.82 | -2.41 | 1995 | 4  | 1.15  | 1.33  | 0.79  | 0.91  | 2.29  | 1.43  | 2.43  |
| 1960 | 11 | 0.26  | -1.81 | -0.39 | -0.20 | -0.40 | -1.84 | -2.33 | 1995 | 5  | 1.40  | 1.70  | 1.73  | 1.91  | 1.08  | 1.98  | 1.57  |
| 1960 | 12 | -2.58 | -2.86 | -2.61 | -2.58 | -2.57 | -2.87 | -2.94 | 1995 | 6  | 0.99  | 1.27  | 1.06  | 1.20  | 0.64  | 2.30  | 1.55  |
| 1961 | 1  | -2.07 | -1.88 | -2.05 | -1.99 | -1.70 | -1.92 | -1.10 | 1995 | 7  | -1.46 | -0.23 | -1.43 | -1.32 | -1.08 | 0.02  | 0.67  |
| 1961 | 2  | -1.65 | -1.84 | -1.79 | -1.71 | -1.35 | -1.87 | -1.07 | 1995 | 8  | -0.77 | 0.70  | -0.45 | -0.26 | -0.61 | 0.83  | 0.84  |
| 1961 | 3  | 0.18  | -0.90 | 0.03  | 0.10  | -0.59 | -0.95 | -0.97 | 1995 | 9  | -1.34 | 0.13  | -0.72 | -0.56 | -0.87 | 0.76  | 0.48  |
| 1961 | 4  | 0.97  | 0.40  | 0.77  | 0.89  | 0.57  | 0.42  | 0.43  | 1995 | 10 | 0.73  | 1.04  | 0.61  | 0.72  | 0.83  | 1.36  | 2.13  |
| 1961 | 5  | 1.37  | 0.98  | 1.20  | 1.35  | 1.15  | 1.09  | 0.84  | 1995 | 11 | 1.18  | 0.08  | 0.71  | 0.82  | 1.38  | 0.21  | 0.29  |
| 1961 | 6  | 0.43  | 0.12  | 0.38  | 0.48  | 0.22  | 0.11  | -0.81 | 1995 | 12 | -2.69 | -2.61 | -2.59 | -2.56 | -2.98 | -2.35 | -3.03 |
| 1961 | 7  | 0.04  | 0.26  | 0.11  | 0.20  | 0.10  | 0.27  | 0.03  | 1996 | 1  | -1.40 | -1.40 | -1.77 | -1.69 | -2.11 | -2.40 | -0.75 |
| 1961 | 8  | 0.31  | 0.63  | 0.46  | 0.57  | 0.32  | 0.69  | 0.32  | 1996 | 2  | -1.33 | -0.99 | -1.63 | -1.53 | 0.05  | -2.11 | -2.13 |
| 1961 | 9  | 1.22  | 0.55  | 1.25  | 1.40  | 0.50  | 0.60  | -0.03 | 1996 | 3  | -3.00 | -2.36 | -2.50 | -2.47 | -2.34 | -2.17 | -0.38 |
| 1961 | 10 | 1.13  | 0.40  | 0.87  | 0.99  | 0.73  | 0.43  | 0.25  | 1996 | 4  | 0.58  | 0.75  | 0.49  | 0.59  | 0.34  | 1.76  | 0.81  |
| 1961 | 11 | 0.89  | 0.39  | 0.68  | 0.79  | 0.67  | 0.42  | 0.50  | 1996 | 5  | -0.93 | -1.10 | -1.71 | -1.62 | -2.14 | -0.76 | -2.57 |
| 1961 | 12 | 0.16  | -0.70 | -0.19 | 0.00  | -0.30 | -0.76 | -0.10 | 1996 | 6  | -0.88 | 0.71  | -0.47 | -0.29 | 0.81  | 0.43  | 0.16  |
| 1962 | 1  | -2.50 | -1.39 | -1.34 | -1.23 | -1.43 | -1.43 | -0.75 | 1996 | 7  | 0.14  | 0.02  | 0.13  | 0.21  | -1.35 | 0.64  | 2.41  |
| 1962 | 2  | -2.20 | -2.32 | -2.38 | -2.34 | -2.02 | -2.34 | -2.09 | 1996 | 8  | 0.13  | -0.82 | 0.16  | 0.24  | -1.40 | 0.62  | 1.02  |
| 1962 | 3  | 0.46  | -1.44 | -1.42 | -1.31 | -1.61 | -1.48 | -1.14 | 1996 | 9  | 0.53  | 1.47  | 0.82  | 0.95  | 0.98  | 2.37  | 1.41  |
| 1962 | 4  | 1.51  | -0.43 | 0.12  | 0.20  | 0.14  | -0.49 | -0.34 | 1996 | 10 | 0.65  | 0.39  | 0.37  | 0.47  | 0.62  | 0.39  | 1.01  |
| 1962 | 5  | 1.74  | 1.41  | 1.78  | 1.97  | 1.44  | 1.57  | 0.99  | 1996 | 11 | 0.30  | -0.58 | 0.17  | 0.25  | 0.24  | -0.22 | 0.84  |
| 1962 | 6  | 0.21  | 0.07  | 0.23  | 0.31  | -0.08 | 0.05  | -0.64 | 1996 | 12 | -0.24 | -2.02 | -0.82 | -0.66 | -0.80 | -2.10 | -0.93 |
| 1962 | 7  | 0.22  | -0.35 | -1.22 | -1.09 | -0.42 | -0.42 | -0.08 | 1997 | 1  | -3.00 | -2.82 | -2.91 | -2.91 | -3.01 | -2.74 | 2.72  |
| 1962 | 8  | 0.25  | 0.34  | 0.96  | 1.09  | 0.34  | 0.36  | 0.01  | 1997 | 2  | -1.85 | -2.36 | -2.26 | -2.21 | -2.46 | -2.82 | -2.44 |
| 1962 | 9  | 1.29  | 0.31  | 0.21  | 0.30  | 0.33  | 0.33  | 0.07  | 1997 | 3  | -2.58 | -1.64 | -2.33 | -2.29 | -2.30 | -2.11 | 0.43  |
| 1962 | 10 | 1.60  | 0.65  | 1.06  | 1.20  | 1.46  | 0.71  | 0.55  | 1997 | 4  | -1.49 | 0.63  | -0.65 | -0.48 | 0.12  | 1.32  | 1.34  |
| 1962 | 11 | 1.70  | -0.08 | 0.09  | 0.17  | -0.28 | -0.15 | -0.39 | 1997 | 5  | 0.48  | 1.69  | 0.62  | 0.73  | 0.73  | 0.56  | 1.29  |
| 1962 | 12 | 0.41  | -1.38 | -1.71 | -1.62 | -1.22 | -1.42 | -0.54 | 1997 | 6  | 0.07  | -0.04 | -0.06 | 0.05  | -0.87 | 0.17  | 0.26  |
| 1963 | 1  | -1.77 | -1.01 | -1.30 | -1.18 | -0.17 | -1.06 | -0.18 | 1997 | 7  | 0.02  | 0.70  | 0.33  | 0.42  | 0.51  | 2.49  | 0.49  |
| 1963 | 2  | 0.21  | -1.01 | -0.25 | -0.05 | -1.15 | -1.06 | -0.93 | 1997 | 8  | -1.87 | -0.79 | -1.50 | -1.39 | -0.88 | -0.20 | -0.82 |
| 1963 | 3  | -1.02 | -1.04 | -1.09 | -0.95 | -1.37 | -1.09 | -1.15 | 1997 | 9  | 1.24  | 1.33  | 1.38  | 1.54  | 1.68  | 1.43  | 0.83  |
| 1963 | 4  | 0.77  | 0.32  | 0.44  | 0.54  | 0.56  | 0.34  | 0.34  | 1997 | 10 | 2.32  | 1.03  | 1.64  | 1.82  | 3.40  | 2.20  | 2.53  |
| 1963 | 5  | 1.93  | 0.47  | 1.54  | 1.70  | 0.25  | 0.51  | -0.40 | 1997 | 11 | 1.37  | 0.77  | 1.08  | 1.22  | 2.12  | 0.41  | 1.42  |
| 1963 | 6  | 0.01  | 0.44  | 0.29  | 0.38  | 0.28  | 0.47  | 0.15  | 1997 | 12 | -0.73 | 0.24  | 0.05  | 0.13  | 0.93  | 0.10  | 0.43  |
| 1963 | 7  | 1.12  | 0.58  | 1.05  | 1.19  | 0.55  | 0.63  | -0.10 | 1998 | 1  | -2.05 | -0.81 | -2.01 | -1.94 | -2.56 | -1.84 | -2.05 |
| 1963 | 8  | -1.71 | 0.07  | -0.39 | -0.21 | -0.40 | 0.06  | -0.31 | 1998 | 2  | -3.00 | -2.48 | -2.72 | -2.70 | -3.00 | -2.66 | -2.29 |
| 1963 | 9  | 1.87  | 0.92  | 1.81  | 1.99  | 0.83  | 1.02  | 0.27  | 1998 | 3  | -2.40 | -1.74 | -1.80 | -1.72 | -2.24 | -2.10 | -0.38 |
| 1963 | 10 | 2.79  | 1.01  | 1.94  | 1.32  | 1.12  | 0.69  | 0.69  | 1998 | 4  | -1.04 | 0.21  | -0.42 | -0.23 | 0.40  | -1.40 | 0.42  |
| 1963 | 11 | 1.34  | 0.63  | 1.09  | 1.23  | 1.41  | 0.69  | 0.73  | 1998 | 5  | 0.09  | 0.89  | 0.45  | 0.55  | 1.69  | 0.59  | 1.17  |
| 1963 | 12 | 0.66  | -0.36 | 0.13  | 0.21  | 0.18  | -0.42 | 0.12  | 1998 | 6  | 0.39  | 0.41  | 0.40  | 0.50  | 0.80  | 1.11  | 1.52  |
| 1964 | 1  | -2.30 | -1.84 | -2.22 | -2.16 | -1.36 | -1.87 | -0.80 | 1998 | 7  | 1.59  | 1.27  | 1.23  | 1.37  | 0.94  | 2.09  | 0.76  |
| 1964 | 2  | -0.16 | -0.96 | -1.32 | -1.20 | -0.75 | -1.01 | 0.00  | 1998 | 8  | -0.91 | 0.71  | 0.06  | 0.14  | 0.61  | 1.07  | 0.61  |
| 1964 | 3  | -1.00 | -0.64 | -0.39 | -0.20 | -0.55 | -0.70 | -0.80 | 1998 | 9  | 0.14  | 1.00  | 0.51  | 0.62  | 0.97  | 1.90  | 1.30  |
| 1964 | 4  | -0.43 | -0.04 | -0.53 | -0.35 | -0.54 | -0.11 | 0.02  | 1998 | 10 | 0.64  | 0.73  | 0.85  | 0.98  | 1.11  | 0.76  | -0.02 |
| 1964 | 5  | 1.72  | 0.58  | 1.25  | 1.40  | 0.14  | 0.63  | -0.52 | 1998 | 11 | 0.45  | 0.12  | 0.52  | 0.63  | 0.26  | 0.52  | -0.20 |
| 1964 | 6  | -0.76 | -0.14 | -0.05 | 0.06  | 0.02  | -0.21 | -0.95 | 1998 | 12 | 0.77  | 0.14  | 1.04  | 1.17  | 0.96  | 0.02  | 0.48  |
| 1964 | 7  | -0.18 | 0.82  | 0.47  | 0.57  | 0.78  | 0.90  | 0.82  | 1999 | 1  | -0.29 | -1.12 | -1.09 | -0.96 | -1.39 | -1.82 | -0.77 |
| 1964 | 8  | -1.93 | -0.54 | -1.11 | -0.97 | -0.72 | -0.60 | -0.57 | 1999 | 2  | -0.83 | -0.89 | -0.82 | -0.67 | -0.29 | -1.53 | -0.04 |
| 1964 | 9  | -0.88 | 0.37  | 0.12  | 0.20  | 0.24  | 0.39  | 0.28  | 1999 | 3  | -1.97 | -0.68 | -1.90 | -1.82 | -0.84 | -1.58 | -0.24 |
| 1964 | 10 | 1.49  | 0.35  | 1.08  | 1.22  | 0.75  | 0.37  | -0.17 | 1999 | 4  | 2.31  | 0.64  | 2.05  | 2.24  | 1.34  | 1.79  | 0.79  |
| 1964 | 11 | 0.08  | 0.01  | 0.07  | 0.14  | 0.46  | -0.04 | 0.02  | 1999 | 5  | 0.76  | 1.19  | 1.12  | 1.27  | 1.57  | 1.68  | 1.76  |
| 1964 | 12 | -1.81 | -1.34 | -1.44 | -1.34 | -1.04 | -1.38 | -0.75 | 1999 | 6  | -1.32 | 0.20  | -0.57 | -0.40 | 0.16  | 0.82  | 1.48  |
| 1965 | 1  | -2.31 | -2.39 | -2.43 | -2.40 | -2.40 | -2.41 | -2.13 | 1999 | 7  | -1.42 | -0.32 | -1.12 | -0.99 | -0.54 | 0.44  | -0.21 |
| 1965 | 2  | -1.27 | -1.80 | -1.93 | -1.86 | -1.31 | -1.84 | -1.19 | 1999 | 8  | -1.25 | 0.44  | -0.53 | -0.36 | -1.12 | 0.43  | 0.19  |
| 1965 | 3  | -2.20 | -1.66 | -1.92 | -1.85 | -1.77 | -1.82 | -1.71 | 1999 | 9  | 0.51  | 0.12  | 0.30  | 0.39  | -0.57 | 0.83  | -0.25 |
| 1965 | 4  | 0.91  | 0.50  | 0.35  | 0.45  | 0.70  | 0.47  | 0.90  | 1999 | 10 | 1.84  | 1.18  | 1.81  | 1.99  | 1.49  | 2.03  | 0.55  |
| 1965 | 5  | 2.27  | 1.25  | 1.63  | 1.80  | 1.18  | 1.51  | 1.12  | 1999 | 11 | 0.61  | 0.06  | 0.49  | 0.59  | 0.22  | -0.92 | 0.68  |
| 1965 | 6  | -1.78 | -0.62 | -1.32 | -1.20 | -0.51 | -0.68 | -1.04 | 1999 | 12 | -0.16 | -2.22 | -0.57 | -0.40 | -2.03 | -1.64 | -2.07 |
| 1965 | 7  | -2.11 | -1.85 | -2.02 | -1.95 | -2.26 | -2.08 | -2.03 | 2000 | 1  | -1.32 | -0.72 | -0.77 | -0.61 | 0.26  | 0.04  | -1.17 |
| 1965 | 8  | -0.85 | 0.55  | 0.47  | 0.57  | 0.66  | 0.67  | 0.57  | 2000 | 2  | -0.08 | 0.25  | 0.05  | 0.13  | 0.51  | 0.46  | -0.61 |
| 1965 | 9  | 0.24  | 0.12  | 0.24  | 0.33  | -0.39 | 0.10  | -0.65 | 2000 | 3  | -1.70 | -0.51 | -0.69 | -0.53 | -0.90 | -1.68 | -1.93 |
| 1965 | 10 | 1.72  | 0.68  | 1.18  | 1.33  | 1.36  | 0.75  | 0.63  | 2000 | 4  | -0.24 | -0.03 | 0.18  | 0.26  | 0.03  | -0.49 | -1.51 |
| 1965 | 11 | 0.20  | 0.07  | 0.08  | 0.16  | 0.56  | 0.05  | 0.34  | 2000 | 5  | 0.13  | 0.06  | 0.08  | 0.16  | -1.17 | -0.17 | -0.91 |
| 1965 | 12 | 0.24  | 0.06  | 0.17  | 0.25  | 0.10  | 0.06  | 0.29  | 2000 | 6  | 0.25  | 0.02  | 0.14  | 0.23  | -0.07 | 0.59  | 1.38  |
| 1966 | 1  | -0.28 | -1.62 | -0.94 | -0.80 | -1.69 | -1.66 | -1.35 | 2000 | 7  | -2.48 | -1.89 | -2.12 | -2.06 | -2.34 | -1.12 | 0.67  |
| 1966 | 2  | -2.58 | -2.55 | -2.52 | -2.49 | -2.58 | -2.56 | -2.54 | 2000 | 8  | 0.35  | 0.24  | 0.41  | 0.51  | 0.25  | 0.51  | 1.68  |
| 1966 | 3  | 0.21  | -0.82 | -0.47 | -0.29 | -0.51 | -0.87 | -0.57 | 2000 | 9  | 1.15  | 0.69  | 0.57  | 0.84  | 0.97  | 0.66  | -0.67 |
| 1966 | 4  | 0.80  | 0.13  | 0.55  | 0.65  | 0.53  | 0.12  | 0.05  | 2000 | 10 | 0.53  | 0.18  | 0.34  | 0.43  | 0.06  | 0.60  | 0.21  |
| 1966 | 5  | -0.57 | -1.84 | -1.48 | -1.37 | -2.24 | -1.88 | -2.20 | 2000 | 11 | -2.15 | -1.52 | -0.48 | -0.30 | 0.10  | -1.29 | 0.03  |
| 1966 | 6  | -0.78 | -0.59 | -0.75 | -0.59 | -0.75 | -0.65 | -1.10 | 2000 | 12 | -1.04 | -2.10 | -1.03 | -0.89 | -0.70 | -1.59 | -1.35 |

|      |    |       |       |       |       |       |       |       |      |    |       |       |       |       |       |       |       |
|------|----|-------|-------|-------|-------|-------|-------|-------|------|----|-------|-------|-------|-------|-------|-------|-------|
| 1966 | 7  | -1.33 | -1.57 | -1.55 | -1.45 | -1.78 | -1.61 | -1.98 | 2001 | 1  | 0.02  | -0.89 | -0.42 | -0.24 | -0.72 | -1.66 | -0.24 |
| 1966 | 8  | -2.53 | -0.91 | -1.80 | -1.72 | -1.46 | -0.97 | -0.32 | 2001 | 2  | -0.67 | -1.60 | -1.20 | -1.08 | -0.74 | -0.53 | -2.11 |
| 1966 | 9  | 1.96  | 1.60  | 1.85  | 2.04  | 1.83  | 1.79  | 1.28  | 2001 | 3  | -1.67 | -1.91 | -2.04 | -1.98 | -1.99 | -2.06 | -1.92 |
| 1966 | 10 | 1.09  | 0.54  | 0.92  | 1.05  | 0.69  | 0.59  | 0.43  | 2001 | 4  | 0.32  | 0.11  | 0.42  | 0.52  | 0.51  | 0.78  | 0.51  |
| 1966 | 11 | 0.19  | 0.05  | 0.14  | 0.22  | 0.55  | 0.03  | 0.14  | 2001 | 5  | 0.12  | 0.59  | 0.03  | 0.10  | -2.03 | 0.65  | -0.94 |
| 1966 | 12 | -1.57 | -1.34 | -1.48 | -1.38 | -0.70 | -1.38 | -0.49 | 2001 | 6  | -0.15 | -0.04 | -0.25 | -0.06 | -0.92 | -0.04 | 0.42  |
| 1967 | 1  | -2.74 | -2.12 | -2.35 | -2.30 | -1.86 | -2.14 | -1.49 | 2001 | 7  | -1.80 | -0.03 | -1.51 | -1.40 | -0.80 | 0.94  | 1.30  |
| 1967 | 2  | -1.76 | -1.65 | -1.95 | -1.88 | -0.67 | -1.69 | -0.57 | 2001 | 8  | -2.96 | -2.68 | -2.81 | -2.80 | -2.58 | -1.73 | -1.74 |
| 1967 | 3  | -1.12 | -1.03 | -0.99 | -0.84 | -0.96 | -1.08 | -1.14 | 2001 | 9  | 0.43  | 0.32  | 0.37  | 0.47  | 0.70  | 0.73  | 0.65  |
| 1967 | 4  | -1.22 | -0.77 | -1.02 | -0.88 | 0.06  | -0.83 | -0.63 | 2001 | 10 | -0.27 | 0.85  | 0.33  | 0.42  | 0.80  | 1.76  | 0.49  |
| 1967 | 5  | 2.18  | 0.12  | 1.02  | 1.15  | -0.20 | 0.11  | -1.02 | 2001 | 11 | 0.25  | 0.34  | 0.27  | 0.36  | 0.04  | -0.23 | -1.11 |
| 1967 | 6  | -0.43 | 0.44  | 0.16  | 0.24  | 0.42  | 0.47  | 0.35  | 2001 | 12 | -0.32 | -0.35 | -0.35 | -0.38 | 0.97  | -0.69 | -2.29 |
| 1967 | 7  | 0.30  | 0.13  | 0.11  | 0.19  | -0.18 | 0.12  | -0.38 | 2002 | 1  | -2.24 | -2.35 | -2.37 | -2.33 | -2.43 | -2.59 | -2.13 |
| 1967 | 8  | -0.51 | -0.50 | -0.55 | -0.37 | -0.63 | -0.57 | -1.11 | 2002 | 2  | -1.42 | -1.83 | -1.58 | -1.49 | -2.66 | -2.47 | -2.38 |
| 1967 | 9  | 0.39  | -0.22 | 0.34  | 0.43  | -0.55 | -0.29 | -1.30 | 2002 | 3  | -2.31 | -1.92 | -1.86 | -1.78 | 0.22  | -1.43 | 0.62  |
| 1967 | 10 | 2.32  | 1.47  | 1.89  | 2.08  | 2.06  | 1.64  | 1.41  | 2002 | 4  | 0.60  | 1.11  | 0.66  | 0.77  | 2.39  | 1.71  | 2.95  |
| 1967 | 11 | 0.73  | 0.92  | 0.83  | 0.96  | 1.00  | 1.02  | 1.37  | 2002 | 5  | 1.00  | 0.36  | 0.72  | 0.84  | 0.94  | 0.74  | -1.77 |
| 1967 | 12 | 0.87  | 0.10  | 0.10  | 0.18  | 0.39  | 0.09  | 0.20  | 2002 | 6  | -1.87 | 0.36  | -1.05 | -0.92 | 0.17  | 1.01  | 0.44  |
| 1968 | 1  | -1.47 | -1.81 | -2.15 | -2.10 | -2.08 | -1.84 | -1.53 | 2002 | 7  | -2.70 | -0.91 | -2.18 | -2.12 | -1.94 | 0.38  | 0.87  |
| 1968 | 2  | -2.78 | -2.16 | -2.14 | -2.08 | -2.16 | -2.18 | -2.46 | 2002 | 8  | -2.30 | -1.54 | -1.84 | -1.76 | -1.98 | -0.98 | 0.64  |
| 1968 | 3  | -1.58 | -1.24 | -1.35 | -1.23 | -0.97 | -1.28 | -0.93 | 2002 | 9  | -0.70 | -1.29 | -1.05 | -0.91 | -1.13 | -2.01 | -1.88 |
| 1968 | 4  | 0.22  | -0.85 | 0.03  | 0.11  | 0.09  | -0.91 | -1.32 | 2002 | 10 | 1.39  | 0.92  | 1.61  | 1.78  | 1.35  | 1.05  | 1.15  |
| 1968 | 5  | -1.40 | -0.11 | -0.76 | -0.61 | -1.06 | -0.18 | -0.29 | 2002 | 11 | 0.62  | -0.45 | 0.33  | 0.42  | 0.93  | 0.16  | 0.39  |
| 1968 | 6  | 0.47  | 0.88  | 0.70  | 0.81  | 0.98  | 0.97  | 0.64  | 2002 | 12 | 0.26  | -1.91 | 0.11  | 0.19  | -0.47 | -1.73 | 0.01  |
| 1968 | 7  | 0.47  | 0.63  | 0.49  | 0.59  | 0.74  | 0.69  | 0.38  | 2003 | 1  | -0.75 | -1.64 | -1.39 | -1.27 | -1.24 | -1.86 | -0.47 |
| 1968 | 8  | -2.23 | -0.98 | -2.00 | -1.94 | -1.15 | -1.03 | -0.55 | 2003 | 2  | -1.54 | -2.28 | -1.73 | -1.64 | -2.56 | -2.15 | -2.13 |
| 1968 | 9  | -0.52 | 0.35  | 0.11  | 0.19  | 0.33  | 0.37  | 0.21  | 2003 | 3  | 0.36  | -0.31 | -0.27 | 0.18  | 0.36  | -0.60 | 0.77  |
| 1968 | 10 | 0.09  | 0.46  | 0.51  | 0.62  | 1.01  | 0.50  | 0.64  | 2003 | 4  | -1.43 | 0.32  | 0.09  | 0.17  | 1.31  | 0.58  | 0.86  |
| 1968 | 11 | 0.54  | -0.10 | 0.11  | 0.19  | 0.66  | -0.17 | -0.10 | 2003 | 5  | 0.54  | -0.11 | 0.13  | 0.22  | -0.49 | 0.39  | 0.50  |
| 1968 | 12 | -1.02 | -0.55 | -0.72 | -0.55 | -0.30 | -0.61 | -0.22 | 2003 | 6  | -0.02 | 0.44  | 0.13  | 0.21  | 0.20  | 0.75  | -1.12 |
| 1969 | 1  | -0.48 | -2.00 | -1.98 | -1.90 | -1.57 | -2.03 | -1.21 | 2003 | 7  | 0.01  | 0.58  | 0.13  | 0.21  | 0.27  | 1.35  | 0.61  |
| 1969 | 2  | -1.74 | -1.80 | -1.56 | -1.46 | -2.07 | -1.84 | -1.92 | 2003 | 8  | -1.74 | 0.29  | -0.88 | -0.73 | 0.07  | 0.95  | 0.09  |
| 1969 | 3  | -2.04 | -2.09 | -2.04 | -1.97 | -2.07 | -2.11 | -1.96 | 2003 | 9  | 0.34  | 0.65  | 0.35  | 0.45  | -0.97 | 1.13  | -1.35 |
| 1969 | 4  | 0.55  | 0.15  | 0.36  | 0.46  | 0.47  | 0.15  | 0.33  | 2003 | 10 | 0.01  | -0.17 | 0.10  | 0.18  | 0.72  | 0.57  | -1.04 |
| 1969 | 5  | 2.01  | 1.53  | 1.79  | 1.97  | 1.26  | 1.71  | 0.74  | 2003 | 11 | 1.02  | -0.05 | 0.49  | 0.59  | 0.80  | -0.70 | 0.82  |
| 1969 | 6  | -1.60 | 0.09  | -0.84 | -0.68 | -0.23 | 0.08  | -0.22 | 2003 | 12 | -2.89 | -1.78 | -2.58 | -2.55 | -2.97 | -1.95 | -1.85 |
| 1969 | 7  | -2.57 | -1.92 | -2.29 | -2.24 | -2.17 | -1.95 | -1.65 | 2004 | 1  | -2.86 | -2.70 | -2.62 | -2.60 | -3.00 | -2.62 | -2.72 |
| 1969 | 8  | 0.16  | 0.11  | 0.25  | 0.34  | 0.12  | 0.10  | 0.05  | 2004 | 2  | -2.02 | -2.59 | -2.33 | -2.29 | -2.68 | -1.84 | -2.47 |
| 1969 | 9  | -2.09 | -0.29 | -1.31 | -1.19 | -0.76 | -0.36 | -0.12 | 2004 | 3  | -2.49 | -0.52 | -2.16 | -2.11 | -0.69 | -0.39 | -0.40 |
| 1969 | 10 | 2.00  | 0.98  | 1.67  | 1.85  | 1.08  | 0.87  | 0.87  | 2004 | 4  | 0.03  | 0.98  | -0.58 | -0.41 | 0.03  | 0.88  | 1.06  |
| 1969 | 11 | 0.39  | -0.74 | -0.03 | 0.06  | -0.48 | -0.79 | -0.77 | 2004 | 5  | 0.26  | 0.60  | 0.49  | 0.59  | 0.22  | 1.15  | 1.06  |
| 1969 | 12 | 1.30  | 0.29  | 0.64  | 0.75  | 0.61  | 0.30  | 0.78  | 2004 | 6  | 0.04  | 0.04  | 0.07  | 0.15  | 0.33  | 0.92  | 0.65  |
| 1970 | 1  | -1.44 | -1.71 | -1.50 | -1.39 | -1.66 | -1.74 | -1.22 | 2004 | 7  | -0.95 | 0.13  | -0.52 | -0.34 | 0.30  | 0.57  | 0.30  |
| 1970 | 2  | -1.43 | -0.78 | -1.16 | -1.03 | 0.15  | -0.83 | 0.25  | 2004 | 8  | -0.73 | -1.72 | -1.38 | -1.26 | -1.55 | -0.95 | -1.03 |
| 1970 | 3  | -0.20 | 4.61  | 4.77  | 5.14  | 3.19  | 5.20  | 4.08  | 2004 | 9  | 0.92  | 1.28  | 1.09  | 1.24  | 0.62  | 0.95  | 0.41  |
| 1970 | 4  | 1.37  | 0.39  | 0.98  | 1.11  | 0.68  | 0.41  | 0.48  | 2004 | 10 | 0.96  | 1.19  | 0.86  | 1.09  | 1.41  | 2.36  | 0.87  |
| 1970 | 5  | 2.23  | 0.13  | 0.86  | 0.99  | 0.23  | 0.12  | -0.76 | 2004 | 11 | 0.43  | -0.22 | 1.09  | 0.34  | 0.53  | 0.04  | 0.07  |
| 1970 | 6  | -0.88 | 0.00  | -0.38 | -0.19 | -0.59 | -0.06 | -0.88 | 2004 | 12 | -1.09 | -0.73 | 0.07  | -0.71 | -0.59 | -0.27 | -0.06 |
| 1970 | 7  | 0.32  | 0.24  | 0.30  | 0.39  | 0.17  | 0.25  | -0.35 | 2005 | 1  | -0.26 | -2.06 | -1.58 | -1.44 | -1.67 | -2.81 | -1.89 |
| 1970 | 8  | -2.54 | 0.03  | -1.51 | -1.41 | -1.20 | 0.01  | 0.07  | 2005 | 2  | -2.86 | -1.77 | -1.11 | -1.86 | -1.75 | -1.27 | -1.56 |
| 1970 | 9  | 0.10  | -0.18 | 0.16  | 0.25  | 0.06  | -0.25 | -0.85 | 2005 | 3  | -1.03 | -1.17 | 0.44  | -0.36 | 0.83  | -0.57 | 0.84  |
| 1970 | 10 | 0.66  | 0.55  | 0.71  | 0.82  | 1.14  | 0.60  | 0.29  | 2005 | 4  | 0.16  | 0.61  | -0.09 | 0.14  | 0.72  | -0.50 | -0.06 |
| 1970 | 11 | 1.56  | 0.48  | 0.97  | 1.11  | 1.03  | 0.52  | 0.71  | 2005 | 5  | 0.55  | -0.51 | 0.20  | -0.48 | -1.55 | -0.35 | -0.93 |
| 1970 | 12 | -2.02 | -1.14 | -1.73 | -1.64 | -0.30 | -1.19 | 0.36  | 2005 | 6  | 0.20  | 0.33  | 0.38  | -1.01 | 0.27  | 1.04  | 0.87  |
| 1971 | 1  | -1.60 | -1.31 | -1.75 | -1.66 | -1.09 | -1.35 | -0.46 | 2005 | 7  | -0.28 | 0.06  | 0.10  | -1.62 | 0.23  | 0.47  | 0.43  |
| 1971 | 2  | -1.86 | -1.80 | -1.68 | -1.58 | -0.88 | -1.84 | -1.36 | 2005 | 8  | -2.64 | -0.46 | -1.01 | -2.48 | -1.82 | -0.37 | -0.51 |
| 1971 | 3  | -1.59 | -1.72 | -1.55 | -1.45 | -1.48 | -1.75 | -1.83 | 2005 | 9  | -1.60 | 0.09  | -0.73 | -1.59 | -0.45 | 0.56  | 0.68  |
| 1971 | 4  | 0.34  | 0.40  | 0.22  | 0.31  | 1.08  | 0.43  | 0.75  | 2005 | 10 | 1.71  | 1.03  | 1.91  | 1.14  | 1.63  | 2.27  | 1.36  |
| 1971 | 5  | 0.06  | 0.06  | 0.01  | 0.09  | -0.20 | 0.04  | -0.68 | 2005 | 11 | 3.07  | 0.62  | 2.83  | 1.46  | 1.96  | 0.98  | 1.11  |
| 1971 | 6  | 0.19  | 0.48  | 0.43  | 0.53  | 0.81  | 0.51  | 0.13  | 2005 | 12 | 0.42  | -0.83 | -0.11 | -0.43 | -1.04 | -1.93 | -0.94 |
| 1971 | 7  | -1.22 | 0.02  | -0.79 | -0.63 | -0.53 | -0.02 | -0.26 | 2006 | 1  | -0.92 | -1.92 | -0.75 | -0.51 | 0.02  | -2.27 | -1.78 |
| 1971 | 8  | -1.46 | 0.47  | -0.17 | 0.01  | 0.56  | 0.51  | 0.77  | 2006 | 2  | -0.43 | -1.48 | -1.48 | -1.85 | -1.86 | -1.70 | -0.78 |
| 1971 | 9  | 0.97  | 1.41  | 1.28  | 1.41  | 1.93  | 1.57  | 1.44  | 2006 | 3  | 0.44  | -0.48 | 0.52  | -0.41 | 0.62  | 0.31  | 0.27  |
| 1971 | 10 | 1.08  | 0.25  | 0.70  | 0.81  | 0.57  | 0.26  | 0.15  | 2006 | 4  | -1.31 | 0.03  | -1.20 | -2.37 | 0.19  | 0.31  | 0.29  |
| 1971 | 11 | -1.58 | -0.48 | -1.17 | -1.04 | -0.55 | -0.35 | -0.35 | 2006 | 5  | 0.05  | 0.66  | 0.08  | 0.41  | 0.25  | 1.35  | 0.50  |
| 1971 | 12 | -0.04 | 0.01  | -0.12 | 0.03  | 0.56  | -0.03 | 0.49  | 2006 | 6  | 0.00  | 0.32  | 0.68  | -1.03 | 0.43  | 0.90  | 0.54  |
| 1972 | 1  | -2.75 | -2.17 | -2.51 | -2.48 | -2.44 | -2.20 | -1.70 | 2006 | 7  | -1.41 | -1.05 | -0.85 | -1.64 | -1.04 | -0.16 | 0.91  |
| 1972 | 2  | -3.00 | -2.81 | -2.88 | -2.88 | -2.93 | -2.82 | -2.79 | 2006 | 8  | 0.47  | 0.44  | 0.62  | 0.30  | 0.45  | 0.82  | 0.39  |
| 1972 | 3  | -1.88 | -1.89 | -1.66 | -1.57 | -2.00 | -1.92 | -2.14 | 2006 | 9  | -0.89 | -0.73 | -0.15 | -0.36 | -1.01 | -0.29 | -1.19 |
| 1972 | 4  | -0.43 | -0.06 | -0.36 | -0.17 | 0.31  | -0.13 | 0.07  | 2006 | 10 | 2.32  | 1.61  | 2.56  | 3.00  | 2.36  | 1.40  | 2.40  |
| 1972 | 5  | 1.51  | 1.40  | 1.75  | 1.93  | 2.18  | 1.56  | 1.09  | 2006 | 11 | 1.82  | 0.85  | 2.37  | 1.15  | 3.43  | 1.29  | 2.02  |
| 1972 | 6  | -0.61 | -0.18 | -0.09 | 0.04  | -0.56 | -0.25 | -0.96 | 2006 | 12 | -2.15 | -1.67 | -1.09 | -0.04 | -0.94 | -1.83 | -0.02 |
| 1972 | 7  | -2.31 | 0.00  | -0.45 | -1.34 | 0.00  | -0.06 | 0.29  | 2007 | 1  | -1.51 | -2.32 | -1.66 | -1.93 | -2.21 | -1.96 | -1.90 |
| 1972 | 8  | -2.00 | -1.07 | -1.76 | -1.67 | -1.45 | -1.12 | -1.24 | 2007 | 2  | -2.84 | -2.91 | -2.92 | -2.94 | -3.01 | -2.81 | -1.64 |

|      |    |       |       |       |       |       |       |       |      |    |       |       |       |       |       |       |       |
|------|----|-------|-------|-------|-------|-------|-------|-------|------|----|-------|-------|-------|-------|-------|-------|-------|
| 1972 | 9  | 0.08  | 0.59  | 0.49  | 0.60  | 0.32  | 0.65  | 0.41  | 2007 | 3  | -2.01 | -1.63 | -2.24 | -2.77 | -0.89 | -1.41 | -1.05 |
| 1972 | 10 | 1.49  | 1.21  | 1.43  | 1.59  | 2.23  | 1.35  | 1.51  | 2007 | 4  | 1.02  | -0.10 | 0.72  | 0.59  | 0.95  | 1.13  | 1.57  |
| 1972 | 11 | 0.70  | 0.30  | 0.48  | 0.58  | 0.94  | 0.31  | 0.45  | 2007 | 5  | 1.33  | 0.38  | 0.35  | -1.90 | -0.19 | 0.96  | -1.00 |
| 1972 | 12 | -0.32 | -0.60 | -0.48 | -0.30 | 0.17  | -0.65 | 0.19  | 2007 | 6  | -1.69 | 0.02  | -0.37 | -1.58 | 0.25  | 0.79  | 0.91  |
| 1973 | 1  | -2.83 | -2.79 | -2.86 | -2.86 | -2.89 | -2.80 | -2.74 | 2007 | 7  | -1.25 | 0.10  | 0.04  | -1.71 | -0.79 | 0.51  | 0.61  |
| 1973 | 2  | -2.29 | -2.58 | -2.53 | -2.50 | -2.60 | -2.56 | -2.67 | 2007 | 8  | 0.41  | 0.28  | 0.15  | 0.35  | 0.02  | 0.36  | 0.85  |
| 1973 | 3  | -1.18 | -0.68 | -0.03 | 0.06  | -0.82 | -0.74 | -1.31 | 2007 | 9  | -0.88 | 0.49  | 0.30  | -0.85 | 0.71  | 0.92  | 1.07  |
| 1973 | 4  | 0.38  | -0.15 | 0.26  | 0.34  | 0.02  | -0.22 | -0.88 | 2007 | 10 | 0.58  | 1.16  | 0.60  | 0.25  | 0.47  | 1.02  | 1.07  |
| 1973 | 5  | 0.71  | -0.07 | 0.39  | 0.49  | -0.57 | -0.14 | -0.89 | 2007 | 11 | -0.89 | 0.58  | 0.76  | -1.30 | -0.17 | -0.49 | -0.67 |
| 1973 | 6  | 0.36  | 0.38  | 0.44  | 0.54  | 0.02  | 0.40  | -0.29 | 2007 | 12 | -1.04 | -2.74 | -1.37 | -0.43 | -1.90 | -2.41 | -1.49 |
| 1973 | 7  | -1.49 | -0.50 | -0.54 | -0.37 | -0.09 | -0.56 | -0.67 | 2008 | 1  | -2.50 | -2.85 | -2.26 | -1.77 | -2.52 | -2.25 | -2.25 |
| 1973 | 8  | -2.07 | -0.47 | -1.54 | -1.43 | -0.59 | -0.53 | -0.24 | 2008 | 2  | -1.06 | -1.26 | 0.79  | 0.43  | -0.20 | 0.01  | 0.10  |
| 1973 | 9  | -2.34 | -1.95 | -2.11 | -2.04 | -2.04 | -1.98 | -1.78 | 2008 | 3  | 0.59  | 0.20  | 1.17  | 0.12  | 1.33  | 0.28  | 0.32  |
| 1973 | 10 | 1.24  | 0.25  | 0.71  | 0.82  | 0.44  | 0.26  | 0.25  | 2008 | 4  | 1.34  | 1.76  | 3.28  | 2.07  | 1.96  | 1.54  | 2.63  |
| 1973 | 11 | 1.21  | 0.08  | 0.58  | 0.68  | 0.35  | 0.06  | 0.01  | 2008 | 5  | -0.20 | 2.40  | 1.98  | 0.97  | 1.15  | 1.71  | 0.02  |
| 1973 | 12 | 0.33  | 0.03  | 0.19  | 0.27  | 0.41  | 0.00  | 0.36  | 2008 | 6  | 0.36  | 2.23  | 0.89  | 0.96  | -0.09 | 0.72  | 0.68  |
| 1974 | 1  | -3.00 | -3.05 | -3.03 | -3.03 | -3.01 | -3.06 | -3.01 | 2008 | 7  | 0.01  | 2.91  | 0.92  | -0.05 | 1.76  | 1.28  | 0.62  |
| 1974 | 2  | -0.57 | -1.49 | -1.54 | -1.44 | -0.72 | -1.53 | -0.94 | 2008 | 8  | -0.70 | 0.23  | -0.79 | -0.90 | -1.50 | -0.24 | -0.94 |
| 1974 | 3  | -1.97 | -2.15 | -2.03 | -1.96 | -2.16 | -2.17 | -2.16 | 2008 | 9  | -0.46 | 0.66  | 0.03  | -0.06 | -1.71 | -0.46 | -1.17 |
| 1974 | 4  | 2.01  | 0.59  | 1.35  | 1.50  | 0.65  | 0.64  | 0.15  | 2008 | 10 | 1.64  | 0.85  | 1.69  | 1.46  | 1.97  | 0.65  | 0.88  |
| 1974 | 5  | 1.62  | 0.51  | 0.69  | 0.81  | 0.56  | 0.55  | 0.34  | 2008 | 11 | -0.69 | 0.21  | 0.30  | 0.15  | 0.91  | -0.84 | 0.30  |
| 1974 | 6  | 0.47  | 0.43  | 0.36  | 0.46  | 0.20  | 0.46  | 0.05  | 2008 | 12 | 0.14  | -1.98 | -0.95 | -1.03 | -1.50 | -1.87 | -1.19 |
| 1974 | 7  | 0.06  | 0.97  | 0.42  | 0.52  | 0.92  | 1.07  | 1.00  | 2009 | 1  | -1.07 | -2.62 | -2.17 | -2.32 | -1.61 | -2.86 | -2.09 |
| 1974 | 8  | -1.23 | 0.11  | -1.01 | -0.87 | 0.11  | 0.10  | 0.29  | 2009 | 2  | -2.92 | -2.95 | -2.57 | -2.62 | -2.97 | -2.64 | -2.71 |
| 1974 | 9  | 0.15  | 1.02  | 0.90  | 1.03  | 0.97  | 1.13  | 0.78  | 2009 | 3  | 0.14  | 0.72  | 1.48  | 0.08  | 0.54  | 0.62  | 0.22  |
| 1974 | 10 | -0.92 | -0.93 | -1.07 | -0.94 | -0.55 | -0.99 | -1.05 | 2009 | 4  | 0.94  | -2.40 | 0.14  | 0.59  | 0.49  | 0.05  | 0.22  |
| 1974 | 11 | -0.40 | -1.66 | -1.30 | -1.18 | -0.93 | -1.69 | -1.06 | 2009 | 5  | -1.30 | 0.71  | 0.08  | 0.14  | 0.08  | 0.51  | 2.64  |
| 1974 | 12 | 0.04  | 0.03  | -0.34 | -0.15 | 0.06  | 0.01  | 0.63  | 2009 | 6  | -0.43 | 0.97  | 0.56  | 0.72  | 0.02  | 1.35  | 0.63  |
| 1975 | 1  | -2.66 | -2.30 | -2.58 | -2.55 | -2.31 | -2.32 | -1.50 | 2009 | 7  | -1.14 | -0.01 | -0.74 | -0.77 | -1.35 | 0.07  | 0.01  |
| 1975 | 2  | -2.52 | -1.47 | -1.74 | -1.65 | -1.40 | -1.51 | -1.65 | 2009 | 8  | -1.48 | 1.01  | 0.48  | -0.79 | 1.25  | 1.08  | 0.23  |
| 1975 | 3  | -0.52 | -0.87 | -0.72 | -0.56 | -0.84 | -0.92 | -0.59 | 2009 | 9  | -0.18 | 0.44  | 0.45  | 0.20  | 0.15  | 0.44  | 0.64  |
| 1975 | 4  | 1.64  | 0.48  | 1.06  | 1.20  | 0.66  | 0.52  | 0.24  | 2009 | 10 | 0.13  | 0.13  | 1.30  | 0.46  | 0.75  | 0.22  | 1.80  |
| 1975 | 5  | 0.61  | 0.63  | 0.64  | 0.75  | 0.23  | 0.68  | 0.32  | 2009 | 11 | 1.41  | -0.44 | 1.14  | 0.64  | 0.29  | -0.03 | 1.02  |
| 1975 | 6  | 0.64  | 1.12  | 0.65  | 0.77  | 0.94  | 1.25  | 1.05  | 2009 | 12 | -0.55 | -0.78 | 0.06  | 0.40  | 0.97  | -0.36 | 0.17  |
| 1975 | 7  | -0.50 | -0.83 | -0.59 | -0.41 | -0.30 | -0.89 | -0.82 | 2010 | 1  | -2.66 | -1.91 | -1.80 | -2.02 | -1.15 | -1.04 | -2.48 |
| 1975 | 8  | -1.88 | 0.23  | -0.76 | -0.60 | 0.41  | 0.24  | 0.37  | 2010 | 2  | -2.93 | -2.96 | -2.74 | -2.69 | -2.55 | -2.76 | -2.48 |
| 1975 | 9  | 0.47  | 0.30  | 0.38  | 0.48  | 0.46  | 0.32  | 0.41  | 2010 | 3  | -1.82 | -0.41 | 0.05  | -0.71 | -1.26 | -1.72 | 0.47  |
| 1975 | 10 | -0.95 | 0.54  | 0.26  | 0.35  | 0.41  | 0.58  | 0.31  | 2010 | 4  | 1.59  | 0.11  | 1.17  | 1.65  | 2.42  | 0.50  | 1.32  |
| 1975 | 11 | 2.11  | 1.09  | 1.60  | 1.77  | 1.61  | 1.21  | 0.80  | 2010 | 5  | 2.89  | 0.84  | 2.19  | 2.81  | 0.54  | 1.38  | 1.11  |
| 1975 | 12 | -1.79 | -0.96 | -0.85 | -0.70 | -0.91 | -1.01 | -0.17 | 2010 | 6  | 0.09  | 1.28  | 0.24  | 0.15  | 0.32  | 1.45  | 0.84  |
| 1976 | 1  | -2.67 | -2.30 | -2.66 | -2.64 | -1.90 | -2.32 | -1.16 | 2010 | 7  | -1.07 | 0.38  | -0.16 | 0.07  | -0.39 | 0.61  | 0.94  |
| 1976 | 2  | -3.00 | -2.42 | -2.69 | -2.67 | -2.78 | -2.44 | -2.47 | 2010 | 8  | -2.76 | 0.05  | -1.55 | -2.27 | -1.34 | 2.21  | 0.98  |
| 1976 | 3  | -1.90 | -1.48 | -1.32 | -1.20 | -1.53 | -1.51 | -1.68 | 2010 | 9  | 0.66  | 0.65  | 1.42  | 1.24  | 0.10  | 0.34  | -0.02 |
| 1976 | 4  | -0.69 | 0.11  | 0.08  | 0.16  | 0.09  | 0.20  | 0.20  | 2010 | 10 | -0.41 | 1.10  | 0.26  | -0.46 | 0.75  | 1.20  | 0.47  |
| 1976 | 5  | 0.14  | -0.69 | -0.09 | 0.04  | -1.91 | -0.75 | -1.90 | 2010 | 11 | 4.19  | 0.57  | 1.93  | 0.96  | 2.45  | 1.78  | 1.10  |
| 1976 | 6  | -1.56 | -1.48 | -1.32 | -1.20 | -1.82 | -1.52 | -1.44 | 2010 | 12 | 0.58  | 0.14  | 0.40  | -0.22 | 0.71  | -0.33 | 0.61  |
| 1976 | 7  | -1.82 | -0.31 | -1.30 | -1.17 | -0.92 | -0.37 | -0.44 | 2011 | 1  | -1.99 | -1.52 | -0.86 | -1.29 | -0.66 | -1.27 | 0.50  |
| 1976 | 8  | 0.05  | -0.12 | -0.18 | 0.01  | -0.39 | -0.18 | -0.38 | 2011 | 2  | -2.45 | -1.38 | -1.61 | -2.08 | -1.21 | -1.98 | -0.22 |
| 1976 | 9  | -2.52 | -1.93 | -2.10 | -2.04 | -1.97 | -1.96 | -2.06 | 2011 | 3  | -0.55 | -1.52 | -1.09 | -0.55 | -1.17 | -1.43 | -1.20 |
| 1976 | 10 | 1.83  | 0.51  | 1.08  | 1.22  | 0.95  | 0.56  | 0.21  | 2011 | 4  | 0.91  | 1.14  | 1.20  | 1.23  | 2.05  | 0.73  | 1.34  |
| 1976 | 11 | 1.55  | 0.78  | 1.30  | 1.46  | 1.41  | 0.86  | 0.71  | 2011 | 5  | 0.08  | 1.56  | 0.98  | 1.24  | 1.85  | 3.43  | -0.09 |
| 1976 | 12 | 0.49  | -0.08 | 0.14  | 0.23  | -0.03 | -0.15 | -0.11 | 2011 | 6  | -0.07 | -1.03 | -0.19 | -0.94 | -1.37 | 0.24  | -0.55 |
| 1977 | 1  | -2.82 | -2.92 | -2.88 | -2.87 | -2.93 | -2.93 | -2.91 | 2011 | 7  | -1.39 | -0.86 | -0.60 | -1.32 | -1.88 | -0.58 | 0.05  |
| 1977 | 2  | -1.10 | -2.13 | -2.01 | -1.94 | -2.38 | -2.16 | -2.08 | 2011 | 8  | -0.56 | 0.41  | 0.57  | 0.16  | 0.42  | 0.32  | -0.11 |
| 1977 | 3  | 0.92  | -0.44 | 0.38  | 0.48  | -0.26 | -0.50 | -1.37 | 2011 | 9  | -1.75 | 0.85  | 0.85  | 0.25  | -0.15 | 1.01  | -0.09 |
| 1977 | 4  | -0.82 | 0.05  | -0.43 | -0.24 | 0.13  | 0.26  | 0.13  | 2011 | 10 | 0.31  | -0.07 | 0.38  | 0.51  | 1.08  | 0.62  | 0.02  |
| 1977 | 5  | 3.02  | 1.51  | 2.78  | 3.02  | 1.74  | 1.69  | 0.50  | 2011 | 11 | 0.03  | -0.39 | -0.09 | -1.20 | -0.74 | -1.47 | -0.33 |
| 1977 | 6  | 0.19  | 0.45  | 0.36  | 0.46  | 0.19  | 0.48  | 0.09  | 2011 | 12 | -2.26 | -2.02 | -0.54 | -0.76 | -0.88 | -2.02 | -1.96 |
| 1977 | 7  | -2.16 | -1.02 | -2.12 | -2.06 | -0.80 | -1.07 | 0.06  | 2012 | 1  | -0.40 | -2.26 | -1.59 | -0.99 | -2.05 | -2.48 | -2.23 |
| 1977 | 8  | -1.04 | -0.54 | -0.77 | -0.61 | -0.69 | -0.60 | -0.50 | 2012 | 2  | -0.70 | -1.80 | -1.07 | -0.87 | -0.03 | -2.29 | -0.17 |
| 1977 | 9  | -0.61 | -1.14 | -0.81 | -0.65 | -1.68 | -1.19 | -0.85 | 2012 | 3  | -1.00 | 0.05  | -1.05 | -1.04 | -1.39 | -0.82 | -0.19 |
| 1977 | 10 | 3.66  | 1.62  | 2.63  | 2.86  | 2.86  | 1.81  | 1.73  | 2012 | 4  | 1.86  | 0.84  | 0.52  | 0.55  | 0.52  | 1.03  | 0.02  |
| 1977 | 11 | 0.03  | 0.10  | 0.16  | 0.25  | 0.47  | 0.09  | 0.26  | 2012 | 5  | -0.51 | -0.22 | -1.35 | -0.34 | -2.56 | -0.55 | -2.76 |
| 1977 | 12 | -2.16 | -0.91 | -1.73 | -1.64 | -1.56 | -0.97 | -0.18 | 2012 | 6  | -1.55 | 0.33  | -0.16 | -1.18 | 0.06  | 0.10  | -1.51 |
| 1978 | 1  | -2.90 | -2.03 | -2.54 | -2.51 | -2.30 | -2.06 | -1.61 | 2012 | 7  | -2.33 | -0.97 | -1.35 | -1.80 | -1.35 | -0.02 | 0.11  |
| 1978 | 2  | -2.82 | -2.32 | -2.53 | -2.50 | -2.14 | -2.35 | -1.85 | 2012 | 8  | 0.09  | 0.07  | 0.46  | 0.22  | -0.31 | 0.21  | 0.12  |
| 1978 | 3  | -0.59 | -1.60 | -0.78 | -0.62 | -0.77 | -1.63 | -1.81 | 2012 | 9  | -0.05 | 0.13  | -1.07 | -0.02 | -1.48 | -0.92 | -1.85 |
| 1978 | 4  | -0.52 | -0.96 | -0.52 | -0.34 | -0.80 | -1.01 | -1.33 | 2012 | 10 | 1.72  | 1.13  | 1.78  | 1.98  | 2.72  | 1.08  | 2.66  |
| 1978 | 5  | 2.03  | 1.81  | 2.08  | 2.29  | 2.03  | 1.56  | 1.56  | 2012 | 11 | 0.13  | 0.70  | 0.78  | -0.23 | 0.50  | 0.71  | 0.32  |
| 1978 | 6  | -1.20 | 0.03  | -0.42 | -0.23 | -0.19 | 0.00  | -0.60 | 2012 | 12 | -0.79 | 0.08  | 0.57  | 0.04  | 0.71  | 0.15  | -1.11 |
| 1978 | 7  | -1.56 | -0.44 | -1.83 | -1.75 | -0.81 | -0.50 | 0.05  | 2013 | 1  | -1.51 | -2.16 | -2.08 | -2.35 | -1.99 | -1.99 | -0.25 |
| 1978 | 8  | -2.54 | -0.34 | -2.05 | -1.98 | -0.71 | -0.41 | 0.15  | 2013 | 2  | -0.31 | -0.91 | -0.87 | -0.29 | -1.48 | -1.42 | -1.46 |
| 1978 | 9  | -1.31 | 0.06  | -0.59 | -0.42 | 0.05  | 0.04  | -0.17 | 2013 | 3  | -1.23 | -0.22 | 0.42  | 0.61  | 0.76  | -0.85 | 1.36  |
| 1978 | 10 | 0.02  | 0.44  | 0.42  | 0.51  | 1.12  | 0.47  | 0.61  | 2013 | 4  | -0.57 | 0.32  | -1.30 | -0.41 | -0.99 | -0.33 | -0.01 |

|      |    |       |  |       |       |       |       |       |       |      |    |       |       |       |       |       |       |       |
|------|----|-------|--|-------|-------|-------|-------|-------|-------|------|----|-------|-------|-------|-------|-------|-------|-------|
| 1978 | 11 | 1.09  |  | 1.02  | 1.14  | 1.29  | 1.96  | 1.13  | 1.40  | 2013 | 5  | 1.18  | 1.22  | 0.85  | 0.91  | 0.90  | 1.62  | 1.64  |
| 1978 | 12 | -0.20 |  | -0.62 | -1.09 | -0.96 | -0.90 | -0.68 | 0.18  | 2013 | 6  | 0.41  | 1.45  | 1.23  | 1.38  | 1.63  | 1.80  | 2.42  |
| 1979 | 1  | -2.95 |  | -2.42 | -2.75 | -2.74 | -2.58 | -2.44 | -2.10 | 2013 | 7  | 0.08  | 0.56  | 0.45  | 0.15  | -0.09 | 1.36  | 0.89  |
| 1979 | 2  | -0.95 |  | -1.47 | -1.08 | -0.95 | -1.28 | -1.51 | -1.45 | 2013 | 8  | -2.64 | -1.32 | -1.91 | -1.11 | -0.68 | -0.79 | 0.93  |
| 1979 | 3  | -1.72 |  | -2.03 | -1.96 | -1.89 | -2.07 | -2.06 | -2.28 | 2013 | 9  | 0.18  | 1.17  | 0.80  | 0.23  | 0.95  | 1.19  | 0.05  |
| 1979 | 4  | 0.23  |  | -0.29 | -0.29 | -0.10 | -0.26 | -0.36 | -0.08 | 2013 | 10 | -0.70 | 0.76  | 0.86  | 0.15  | 0.19  | 0.76  | 0.25  |
| 1979 | 5  | -0.66 |  | -0.13 | -0.57 | -0.39 | -0.26 | -0.20 | -0.19 | 2013 | 11 | 0.12  | 0.13  | 0.79  | 0.63  | -0.26 | -1.70 | -0.65 |
| 1979 | 6  | 0.32  |  | 0.62  | 0.50  | 0.60  | 0.70  | 0.68  | 0.44  | 2013 | 12 | -2.47 | -2.24 | -2.79 | -2.39 | -2.67 | -2.88 | -1.50 |
| 1979 | 7  | -1.17 |  | 0.07  | -0.99 | -0.85 | -0.07 | 0.05  | 0.13  | 2014 | 1  | -1.60 | -2.35 | -2.50 | -2.28 | -2.53 | -2.10 | -1.35 |
| 1979 | 8  | -2.17 |  | -2.02 | -2.34 | -2.30 | -2.18 | -2.05 | -1.95 | 2014 | 2  | -2.68 | -2.15 | -2.78 | -2.89 | -1.89 | -2.58 |       |
| 1979 | 9  | 1.44  |  | 1.29  | 1.52  | 1.69  | 1.20  | 1.44  | 1.22  | 2014 | 3  | -0.63 | -1.40 | -1.36 | -0.82 | -2.19 | -2.59 | -1.91 |
| 1979 | 10 | 0.38  |  | 0.68  | 0.37  | 0.47  | 0.79  | 0.74  | 1.32  | 2014 | 4  | 0.38  | 0.39  | 0.38  | 0.62  | 0.83  | 0.07  | 1.50  |
| 1979 | 11 | 1.51  |  | 0.46  | 0.88  | 1.01  | 1.49  | 0.49  | 0.78  | 2014 | 5  | -1.63 | 0.53  | -0.95 | -0.82 | 0.34  | -0.59 | -2.12 |
| 1979 | 12 | 0.59  |  | -0.88 | -0.30 | -0.11 | -0.27 | -0.93 | -0.71 | 2014 | 6  | 0.30  | 1.10  | 1.02  | 1.01  | 1.00  | 1.42  | 1.45  |
| 1980 | 1  | -2.99 |  | -2.78 | -2.91 | -2.91 | -2.86 | -2.79 | -2.56 | 2014 | 7  | -2.42 | 0.00  | -0.72 | -1.16 | -0.48 | 0.09  | 0.06  |
| 1980 | 2  | -3.00 |  | -2.95 | -2.97 | -2.97 | -2.97 | -2.95 | -2.95 | 2014 | 8  | 0.38  | 1.51  | 1.11  | 0.84  | 0.63  | 1.53  | -0.32 |
| 1980 | 3  | -2.51 |  | -1.78 | -1.89 | -1.81 | -1.99 | -1.81 | -1.84 | 2014 | 9  | 0.69  | 1.36  | 0.54  | 0.29  | 1.43  | 1.40  | 0.05  |
| 1980 | 4  | 0.24  |  | 0.09  | 0.12  | 0.20  | 0.20  | 0.07  | 0.26  | 2014 | 10 | 1.42  | 2.25  | 1.33  | 1.45  | 1.64  | 1.27  | 1.15  |
| 1980 | 5  | 0.17  |  | 0.05  | -0.06 | 0.05  | -0.10 | 0.03  | -0.38 | 2014 | 11 | 0.51  | 0.25  | -0.05 | 0.26  | 0.31  | 0.03  | -0.22 |
| 1980 | 6  | 0.50  |  | 0.13  | 0.33  | 0.43  | 0.13  | 0.12  | -1.11 | 2014 | 12 | 1.56  | 0.20  | 0.75  | 0.61  | 2.13  | 0.31  | 1.27  |
| 1980 | 7  | -2.42 |  | -0.44 | -1.58 | -1.48 | -0.83 | -0.50 | -0.73 | 2015 | 1  | -2.46 | -1.71 | -1.98 | -1.77 | -2.92 | -2.34 | -2.36 |
| 1980 | 8  | -0.68 |  | -0.25 | -0.52 | -0.35 | -0.53 | -0.31 | -0.84 | 2015 | 2  | -0.99 | 0.16  | -1.35 | 0.04  | -2.07 | -1.48 | -0.12 |
| 1980 | 9  | -0.11 |  | -0.13 | 0.12  | 0.20  | 0.18  | -0.20 | -0.32 | 2015 | 3  | 0.20  | 0.05  | 0.38  | 0.24  | 0.19  | -0.60 | -1.66 |
| 1980 | 10 | 1.43  |  | 0.36  | 0.75  | 0.87  | 0.72  | 0.38  | 0.44  | 2015 | 4  | 0.45  | 1.94  | 1.52  | 0.16  | 0.94  | 0.01  | 0.85  |
| 1980 | 11 | 0.45  |  | 0.48  | 0.54  | 0.65  | 0.78  | 0.52  | 0.62  | 2015 | 5  | -0.23 | 0.52  | 0.17  | -0.57 | 0.01  | 0.89  | -1.03 |
| 1980 | 12 | -0.18 |  | -1.01 | -0.55 | -0.37 | -1.11 | -1.06 | -1.13 | 2015 | 6  | 0.29  | 0.53  | 0.82  | 0.72  | 0.08  | 0.77  | 0.10  |
| 1981 | 1  | -1.08 |  | -1.71 | -1.19 | -1.07 | -1.54 | -1.74 | -1.77 | 2015 | 7  | -2.39 | -1.29 | -1.93 | -1.83 | 0.07  | 0.07  | 0.04  |
| 1981 | 2  | -1.47 |  | -2.02 | -2.06 | -1.99 | -2.30 | -2.04 | -1.83 | 2015 | 8  | -1.51 | 0.07  | -1.05 | -0.90 | -0.01 | 0.61  | -0.88 |
| 1981 | 3  | -1.32 |  | -1.68 | -1.77 | -1.68 | -1.58 | -1.71 | -1.63 | 2015 | 9  | 2.38  | 0.64  | 0.28  | 0.81  | 0.44  | 0.88  | 0.21  |
| 1981 | 4  | 0.09  |  | -0.73 | -0.06 | 0.05  | -0.71 | -0.78 | -1.00 | 2015 | 10 | 0.28  | 1.38  | 1.99  | 1.04  | 1.20  | 2.10  | 1.47  |
| 1981 | 5  | 1.37  |  | 0.16  | 0.81  | 0.94  | -0.29 | 0.15  | -0.66 | 2015 | 11 | 1.82  | 1.36  | 0.83  | 1.12  | 1.47  | 0.93  | 0.32  |
| 1981 | 6  | -0.01 |  | 0.42  | 0.03  | 0.10  | 0.43  | 0.45  | 0.36  | 2015 | 12 | 1.03  | 0.16  | -0.17 | 0.45  | 0.88  | 0.09  | -1.03 |
| 1981 | 7  | -2.44 |  | 0.08  | -1.59 | -1.49 | 0.25  | 0.07  | 0.72  | 2016 | 1  | -1.93 | -2.95 | -2.20 | -1.26 | -2.74 | -2.47 | -1.67 |
| 1981 | 8  | -1.69 |  | -1.34 | -1.50 | -1.40 | -1.18 | -1.38 | -1.36 | 2016 | 2  | -1.25 | -2.38 | -0.59 | -1.79 | -2.59 | -2.08 | -2.74 |
| 1981 | 9  | -1.03 |  | 0.54  | 0.25  | 0.34  | 1.14  | 0.58  | 0.56  | 2016 | 3  | -1.50 | 0.10  | -0.38 | -1.55 | -1.01 | -0.76 | -1.29 |
| 1981 | 10 | 0.05  |  | 0.01  | 0.18  | 0.26  | 0.06  | -0.06 | 0.00  | 2016 | 4  | 0.02  | 1.01  | 0.77  | 1.03  | 0.33  | 0.70  | 0.54  |
| 1981 | 11 | 1.47  |  | 0.39  | 0.86  | 0.98  | 0.88  | 0.41  | 0.32  | 2016 | 5  | 3.03  | 4.90  | 4.39  | 3.67  | 3.94  | 4.42  | 3.06  |
| 1981 | 12 | -2.11 |  | -1.60 | -1.73 | -1.64 | -1.72 | -1.64 | -1.26 | 2016 | 6  | -0.83 | 0.06  | -0.95 | -0.71 | -0.78 | 0.03  | -1.07 |
| 1982 | 1  | -2.93 |  | -2.76 | -2.79 | -2.78 | -2.88 | -2.77 | -2.79 | 2016 | 7  | -2.19 | -0.51 | -1.09 | -1.36 | -1.88 | -0.51 | -1.31 |
| 1982 | 2  | -3.00 |  | -2.92 | -2.87 | -2.86 | -2.96 | -2.93 | -2.96 | 2016 | 8  | -2.98 | -1.43 | -2.57 | -2.75 | -2.66 | -0.51 | -0.83 |
| 1982 | 3  | 0.68  |  | -0.11 | 0.19  | 0.27  | -0.37 | -0.18 | -0.25 | 2016 | 9  | -2.53 | -1.57 | -2.21 | -2.39 | -2.51 | -1.48 | -1.91 |
| 1982 | 4  | -1.22 |  | 0.18  | 0.19  | 0.28  | 0.53  | 0.18  | 0.05  | 2016 | 10 | 1.01  | 0.13  | -0.40 | 0.13  | -0.63 | -0.63 | -1.77 |
| 1982 | 5  | 0.75  |  | 0.90  | 0.77  | 0.89  | 1.25  | 1.00  | 0.99  | 2016 | 11 | 1.18  | 0.52  | 0.51  | 1.39  | -0.63 | 0.09  | 0.02  |
| 1982 | 6  | 0.06  |  | 1.19  | 0.71  | 0.83  | 1.21  | 1.32  | 0.92  | 2016 | 12 | -0.29 | -2.94 | -2.35 | -2.39 | -2.35 | -2.60 | -2.75 |
| 1982 | 7  | -0.36 |  | 0.04  | -0.18 | 0.01  | 0.08  | 0.02  | -0.53 | 2017 | 1  | -1.64 | -2.77 | -0.60 | -1.50 | -1.97 | -2.62 | -2.44 |
| 1982 | 8  | -0.97 |  | -0.38 | -0.65 | -0.49 | -0.52 | -0.44 | -0.74 | 2017 | 2  | -1.49 | -2.94 | -2.99 | -2.46 | -2.88 | -2.97 | -2.75 |
| 1982 | 9  | -1.28 |  | -1.20 | -1.24 | -1.12 | -1.68 | -1.24 | -1.18 | 2017 | 3  | -0.81 | 0.97  | 0.42  | 0.38  | 0.59  | 0.08  | 1.00  |
| 1982 | 10 | 0.02  |  | 0.71  | 0.83  | 0.94  | 0.68  | 0.53  | 0.53  | 2017 | 4  | -1.67 | 0.05  | 0.18  | -1.00 | -1.24 | -1.42 | -1.00 |
| 1982 | 11 | 1.34  |  | 0.97  | 1.41  | 1.56  | 1.65  | 1.07  | 0.82  | 2017 | 5  | 0.85  | 2.61  | 2.05  | 2.51  | 0.56  | 2.06  | 1.12  |
| 1982 | 12 | -2.16 |  | -1.32 | -1.81 | -1.73 | -0.39 | -1.37 | -0.05 | 2017 | 6  | -0.68 | 0.74  | 0.09  | -0.26 | -0.18 | 0.58  | -0.83 |
| 1983 | 1  | -3.00 |  | -2.59 | -2.77 | -2.76 | -2.80 | -2.61 | -2.49 | 2017 | 7  | -2.23 | -0.25 | -0.77 | -1.67 | -1.56 | -0.31 | -1.43 |
| 1983 | 2  | -2.30 |  | -2.65 | -2.65 | -2.63 | -2.76 | -2.66 | -2.66 | 2017 | 8  | -1.85 | 0.65  | -0.53 | -0.97 | -0.99 | 0.78  | 0.43  |
| 1983 | 3  | -2.01 |  | -2.30 | -2.36 | -2.31 | -2.70 | -2.33 | -2.50 | 2017 | 9  | 0.91  | 1.72  | 2.14  | 2.45  | 1.24  | 1.31  | 0.59  |
| 1983 | 4  | -1.64 |  | -2.16 | -1.93 | -1.86 | -2.26 | -2.19 | -2.29 | 2017 | 10 | 1.51  | 1.80  | 1.60  | 1.20  | 1.20  | 1.68  | 0.76  |
| 1983 | 5  | 0.82  |  | 0.28  | 0.55  | 0.66  | 0.27  | 0.29  | -0.24 | 2017 | 11 | 0.59  | 0.46  | 1.18  | 0.36  | 0.12  | 0.19  | 0.18  |
| 1983 | 6  | -1.06 |  | -0.26 | -0.49 | -0.31 | -0.72 | -0.33 | -1.20 | 2017 | 12 | -0.18 | -0.39 | 0.28  | -1.78 | -1.39 | -0.79 | -0.31 |
| 1983 | 7  | -0.33 |  | -0.31 | -0.41 | -0.23 | -0.68 | -0.37 | -0.87 | 2018 | 1  | -2.25 | -2.76 | -2.01 | -2.58 | -2.40 | -2.46 | -2.37 |
| 1983 | 8  | -1.46 |  | -0.15 | -0.37 | -0.19 | -0.72 | -0.68 | -0.68 | 2018 | 2  | -1.22 | 0.36  | -0.06 | -1.56 | -2.54 | -0.80 | -0.38 |
| 1983 | 9  | 0.58  |  | 0.46  | 1.02  | 1.16  | 0.23  | 0.50  | -0.54 | 2018 | 3  | -1.87 | 0.37  | -0.82 | -2.18 | -0.83 | 0.13  | 0.52  |
| 1983 | 10 | -1.45 |  | -1.21 | -1.10 | -0.97 | 0.04  | -1.25 | -0.67 | 2018 | 4  | 0.44  | 1.23  | 1.72  | 0.27  | 0.57  | 0.86  | 0.97  |
| 1983 | 11 | 0.31  |  | 0.27  | 0.41  | 0.51  | 0.52  | 0.27  | 0.39  | 2018 | 5  | 1.27  | 4.15  | 1.88  | 0.75  | 2.57  | 1.94  | 1.88  |
| 1983 | 12 | 0.22  |  | 0.40  | 0.43  | 0.52  | 0.40  | 0.43  | 0.60  | 2018 | 6  | -0.45 | 1.93  | 0.62  | 0.25  | 0.60  | 1.98  | 0.76  |
| 1984 | 1  | 0.15  |  | -0.21 | 0.08  | 0.16  | 0.09  | -0.28 | 0.03  | 2018 | 7  | -1.87 | -0.39 | -1.48 | -1.91 | -1.54 | -0.39 | 0.63  |
| 1984 | 2  | -0.06 |  | 0.12  | 0.08  | 0.14  | 0.29  | 0.11  | 0.34  | 2018 | 8  | -1.95 | -0.55 | -1.38 | -1.95 | -1.52 | 0.20  | 1.81  |
| 1984 | 3  | -0.34 |  | 0.03  | -0.02 | 0.06  | 0.41  | 0.01  | 0.14  | 2018 | 9  | 0.43  | -0.42 | -0.23 | -1.17 | 0.07  | 0.19  | 0.20  |
| 1984 | 4  | 0.38  |  | 0.63  | 0.81  | 0.94  | 0.90  | 0.69  | 0.63  | 2018 | 10 | 1.90  | 1.29  | 2.12  | 0.90  | 2.30  | 1.28  | 1.20  |
| 1984 | 5  | 1.64  |  | 0.46  | 0.90  | 1.03  | 0.30  | 0.50  | -0.07 | 2018 | 11 | 1.26  | 1.02  | 1.52  | -0.86 | 0.71  | 0.77  | -0.28 |
| 1984 | 6  | -0.10 |  | 0.27  | 0.02  | 0.10  | 0.07  | 0.28  | 0.14  | 2018 | 12 | -0.71 | -1.64 | -2.14 | -1.81 | -0.66 | -1.82 | -0.42 |
| 1984 | 7  | -0.91 |  | 0.57  | 0.06  | 0.14  | 0.45  | 0.62  | 0.72  | 2019 | 1  | -2.75 | -2.93 | -2.46 | -2.97 | -2.92 | -2.91 | -1.93 |
| 1984 | 8  | -2.92 |  | -2.28 | -2.85 | -2.84 | -2.28 | -2.30 | -1.31 | 2019 | 2  | -0.43 | 0.02  | 0.10  | -1.47 | -0.75 | 0.16  | -0.48 |
| 1984 | 9  | 0.83  |  | 0.40  | 0.47  | 0.58  | 0.80  | 0.43  | 0.40  | 2019 | 3  | -2.32 | -1.21 | -1.78 | -2.49 | -2.61 | -2.52 | -1.09 |
| 1984 | 10 | -0.36 |  | -0.29 | -0.07 | 0.05  | 0.06  | -0.35 | -0.39 | 2019 | 4  | 0.06  | 0.85  | 0.84  | -1.88 | -0.49 | -0.44 | 1.19  |
| 1984 | 11 | 0.94  |  | 0.26  | 0.82  | 0.94  | 0.42  | 0.26  | 0.08  | 2019 | 5  | -0.92 | -0.04 | -1.04 | -2.12 | -2.46 | -0.73 | -1.98 |
| 1984 | 12 | -2.60 |  | -1.35 | -1.81 | -1.72 | -1.15 | -1.39 | -0.94 | 2019 | 6  | 0.39  | 0.93  | 0.74  | -0.93 | 0.48  | 0.73  | 0.19  |



|      |   |       |       |       |       |       |       |       |      |    |       |       |       |       |       |       |       |
|------|---|-------|-------|-------|-------|-------|-------|-------|------|----|-------|-------|-------|-------|-------|-------|-------|
| 1985 | 1 | -1.63 | -1.55 | -1.70 | -1.61 | -1.38 | -1.59 | -1.39 | 2019 | 7  | -0.77 | -0.66 | -0.86 | -1.99 | -1.20 | 0.39  | 0.47  |
| 1985 | 2 | -0.76 | -1.30 | -0.68 | -0.52 | -1.38 | -1.35 | -1.57 | 2019 | 8  | 0.56  | 1.16  | 1.03  | -0.78 | 1.29  | 1.65  | 1.07  |
| 1985 | 3 | -1.10 | -1.08 | -1.38 | -1.27 | -1.22 | -1.13 | -0.73 | 2019 | 9  | 2.27  | 1.01  | 2.04  | 1.37  | 1.22  | 0.50  | 0.38  |
| 1985 | 4 | -1.75 | -1.71 | -1.49 | -1.38 | -1.23 | -1.74 | -1.71 | 2019 | 10 | 0.91  | 1.87  | 1.85  | 1.26  | 2.19  | 1.57  | 1.18  |
| 1985 | 5 | 0.37  | 0.67  | 0.71  | 0.82  | 0.69  | 0.74  | 0.44  | 2019 | 11 | 1.33  | 1.11  | 2.20  | 1.23  | 1.19  | 0.98  | 0.41  |
| 1985 | 6 | 0.71  | 1.77  | 1.15  | 1.29  | 2.11  | 1.98  | 1.53  | 2019 | 12 | 0.36  | -1.62 | -1.01 | 0.33  | -0.66 | -1.18 | -1.14 |

**Table S3(a): Temporal variability of RAI in the Southwest Monsoon.**

| Date   | Glencus<br>e | Hanwell<br>a | Holombuw<br>a | Kithulgal<br>a | Norwood | Date   | Glencus<br>e | Hanwell<br>a | Holombuw<br>a | Kithulgal<br>a | Norwood | Date   | Glencus<br>e | Hanwell<br>a | Holombuw<br>a | Kithulgal<br>a | Norwood | Date   | Glencus<br>e | Hanwell<br>a | Holombuw<br>a | Kithulgal<br>a | Norwood |
|--------|--------------|--------------|---------------|----------------|---------|--------|--------------|--------------|---------------|----------------|---------|--------|--------------|--------------|---------------|----------------|---------|--------|--------------|--------------|---------------|----------------|---------|
| May-51 | -2.28        | -2.23        | -2.52         | -2.51          | -2.62   | Jun-60 | -2.93        | -2.93        | -2.76         | -2.77          | -2.66   | Jul-69 | -2.29        | -2.24        | -2.17         | -1.95          | -1.65   | Aug-78 | -2.05        | -1.98        | -0.71         | -0.41          | 0.15    |
| Jun-51 | -2.31        | -2.26        | -1.56         | -1.43          | -1.03   | Jul-60 | -1.53        | -1.43        | -1.24         | -1.96          | -2.18   | Aug-69 | 0.25         | 0.34         | 0.12          | 0.10           | 0.05    | Sep-78 | -0.59        | -0.42        | 0.05          | 0.04           | -0.17   |
| Jul-51 | -2.76        | -2.75        | -2.53         | -2.58          | -2.42   | Aug-60 | -2.89        | -2.89        | -2.72         | -2.74          | -2.61   | Sep-69 | -1.31        | -1.19        | -0.76         | -0.36          | -0.12   | May-79 | -0.57        | -0.39        | -0.26         | -0.20          | -0.19   |
| Aug-51 | -3.02        | -3.02        | -2.86         | -2.94          | -2.86   | Sep-60 | -2.71        | -2.69        | -2.25         | -2.27          | -2.01   | May-70 | 0.86         | 0.99         | 0.23          | 0.12           | -0.76   | Jun-79 | 0.50         | 0.60         | 0.70          | 0.68           | 0.44    |
| Sep-51 | -2.22        | -2.16        | -1.97         | -2.37          | -2.41   | May-61 | 1.20         | 1.35         | 1.15          | 1.09           | 0.84    | Jun-70 | -0.38        | -0.19        | -0.59         | -0.06          | -0.88   | Jul-79 | -0.99        | -0.85        | -0.07         | 0.05           | 0.13    |
| May-52 | -2.28        | -2.24        | -1.42         | -1.50          | -1.19   | Jun-61 | 0.38         | 0.48         | 0.22          | 0.11           | -0.81   | Jul-70 | 0.30         | 0.39         | 0.17          | 0.25           | -0.35   | Aug-79 | -2.34        | -2.30        | -2.18         | -2.05          | -1.95   |
| Jun-52 | -2.86        | -2.85        | -2.52         | -2.56          | -2.36   | Jul-61 | 0.11         | 0.20         | 0.10          | 0.27           | 0.03    | Aug-70 | -1.51        | -1.41        | -1.20         | 0.01           | 0.07    | Sep-79 | 1.53         | 1.69         | 1.20          | 1.44           | 1.22    |
| Jul-52 | -2.81        | -2.80        | -2.45         | -2.63          | -2.49   | Aug-61 | 0.46         | 0.57         | 0.32          | 0.69           | 0.32    | Sep-70 | 0.16         | 0.25         | 0.06          | -0.25          | -0.85   | May-80 | -0.06        | 0.05         | -0.10         | 0.03           | -0.38   |
| Aug-52 | -2.91        | -2.90        | -2.66         | -2.79          | -2.68   | Sep-61 | 1.25         | 1.40         | 0.50          | 0.60           | -0.03   | May-71 | 0.01         | 0.09         | -0.20         | 0.04           | -0.68   | Jun-80 | 0.33         | 0.43         | 0.13          | 0.12           | -1.11   |
| Sep-52 | -2.98        | -2.98        | -2.70         | -2.76          | -2.60   | May-62 | 1.78         | 1.97         | 1.44          | 1.57           | 0.99    | Jun-71 | 0.43         | 0.53         | 0.81          | 0.51           | 0.13    | Jul-80 | -1.58        | -1.48        | -0.83         | -0.50          | -0.73   |
| May-53 | -3.01        | -3.01        | -3.01         | -3.06          | -3.03   | Jun-62 | 0.23         | 0.31         | -0.08         | 0.05           | -0.64   | Jul-71 | -0.79        | -0.63        | -0.53         | -0.02          | -0.26   | Aug-80 | -0.52        | -0.35        | -0.53         | -0.31          | -0.84   |
| Jun-53 | -2.75        | -2.73        | -2.48         | -2.65          | -2.59   | Jul-62 | -1.22        | -1.09        | -0.21         | -0.42          | -0.08   | Aug-71 | -0.17        | 0.01         | 0.56          | 0.51           | 0.77    | Sep-80 | 0.12         | 0.20         | 0.18          | -0.20          | -0.32   |
| Jul-53 | -1.43        | -1.32        | -1.82         | -1.90          | -2.07   | Aug-62 | 0.96         | 1.09         | 0.34          | 0.36           | 0.01    | Sep-71 | 1.26         | 1.41         | 1.93          | 1.57           | 1.44    | May-81 | 0.81         | 0.94         | -0.29         | 0.15           | -0.66   |
| Aug-53 | -3.01        | -3.01        | -2.87         | -2.93          | -2.83   | Sep-62 | 0.21         | 0.30         | 0.33          | 0.33           | 0.07    | May-72 | 1.75         | 1.93         | 2.18          | 1.56           | 1.09    | Jun-81 | 0.03         | 0.10         | 0.43          | 0.45           | 0.36    |
| Sep-53 | -2.77        | -2.76        | -2.43         | -2.68          | -2.60   | May-63 | 1.54         | 1.70         | 0.25          | 0.51           | -0.40   | Jun-72 | -0.09        | 0.04         | -0.56         | -0.25          | -0.96   | Jul-81 | -1.59        | -1.49        | 0.25          | 0.07           | 0.72    |
| May-54 | -2.39        | -2.35        | -2.37         | -2.64          | -2.70   | Jun-63 | 0.29         | 0.38         | 0.28          | 0.47           | 0.15    | Jul-72 | -1.45        | -1.34        | 0.00          | -0.06          | 0.29    | Aug-81 | -1.50        | -1.40        | -1.18         | -1.38          | -1.36   |
| Jun-54 | -2.95        | -2.95        | -2.82         | -2.85          | -2.76   | Jul-63 | 1.05         | 1.19         | 0.55          | 0.63           | -0.10   | Aug-72 | -1.76        | -1.67        | -1.45         | -1.12          | -1.24   | Sep-81 | 0.25         | 0.34         | 1.14          | 0.58           | 0.56    |
| Jul-54 | -2.28        | -2.23        | -2.49         | -2.55          | -2.61   | Aug-63 | -0.39        | -0.21        | -0.40         | 0.06           | -0.31   | Sep-72 | 0.49         | 0.60         | 0.32          | 0.65           | 0.41    | May-82 | 0.77         | 0.89         | 1.25          | 1.00           | 0.99    |
| Aug-54 | -2.66        | -2.64        | -2.19         | -2.33          | -2.12   | Sep-63 | 1.81         | 1.99         | 0.83          | 1.02           | 0.27    | May-73 | 0.39         | 0.49         | -0.57         | -0.14          | -0.89   | Jun-82 | 0.71         | 0.83         | 1.21          | 1.32           | 0.92    |
| Sep-54 | -2.88        | -2.88        | -2.78         | -2.89          | -2.86   | May-64 | 1.25         | 1.40         | 0.14          | 0.63           | -0.52   | Jun-73 | 0.44         | 0.54         | 0.02          | 0.40           | -0.29   | Jul-82 | -0.18        | 0.01         | 0.08          | 0.02           | -0.53   |
| May-55 | -1.85        | -1.77        | -1.99         | -2.25          | -2.33   | Jun-64 | -0.05        | 0.06         | 0.02          | -0.21          | -0.95   | Jul-73 | -0.54        | -0.37        | -0.09         | -0.56          | -0.67   | Aug-82 | -0.65        | -0.49        | -0.52         | -0.44          | -0.74   |
| Jun-55 | -2.83        | -2.82        | -2.12         | -2.12          | -1.73   | Jul-64 | 0.47         | 0.57         | 0.78          | 0.90           | 0.82    | Aug-73 | -1.54        | -1.43        | -0.59         | -0.53          | -0.24   | Sep-82 | -1.24        | -1.12        | -1.68         | -1.24          | -1.18   |
| Jul-55 | -2.96        | -2.96        | -2.80         | -2.84          | -2.72   | Aug-64 | -1.11        | -0.97        | -0.72         | -0.60          | -0.57   | Sep-73 | -2.11        | -2.04        | -2.04         | -1.98          | -1.78   | May-83 | 0.55         | 0.66         | 0.27          | 0.29           | -0.24   |
| Aug-55 | -2.91        | -2.91        | -2.69         | -2.85          | -2.79   | Sep-64 | 0.12         | 0.20         | 0.24          | 0.39           | 0.28    | May-74 | 0.69         | 0.81         | 0.56          | 0.55           | 0.34    | Jun-83 | -0.49        | -0.31        | -0.72         | -0.33          | -1.20   |
| Sep-55 | -2.47        | -2.43        | -2.20         | -2.45          | -2.35   | May-65 | 1.63         | 1.80         | 1.18          | 1.51           | 1.12    | Jun-74 | 0.36         | 0.46         | 0.20          | 0.46           | 0.05    | Jul-83 | -0.41        | -0.23        | -0.68         | -0.37          | -0.87   |
| May-56 | -2.78        | -2.77        | -2.77         | -2.81          | -2.77   | Jun-65 | -1.32        | -1.20        | -0.51         | -0.68          | -1.04   | Jul-74 | 0.42         | 0.52         | 0.92          | 1.07           | 1.00    | Aug-83 | -0.37        | -0.19        | -0.19         | -0.22          | -0.68   |
| Jun-56 | -2.67        | -2.65        | -1.66         | -1.81          | -1.33   | Jul-65 | -2.02        | -1.95        | -2.26         | -2.08          | -2.03   | Aug-74 | -1.01        | -0.87        | 0.11          | 0.10           | 0.29    | Sep-83 | 1.02         | 1.16         | 0.23          | 0.50           | -0.54   |
| Jul-56 | -2.98        | -2.98        | -2.73         | -2.81          | -2.66   | Aug-65 | 0.47         | 0.57         | 0.66          | 0.67           | 0.57    | Sep-74 | 0.90         | 1.03         | 0.97          | 1.13           | 0.78    | May-84 | 0.90         | 1.03         | 0.30          | 0.50           | -0.07   |
| Aug-56 | -2.54        | -2.51        | -2.62         | -2.63          | -2.62   | Sep-65 | 0.24         | 0.33         | -0.39         | 0.10           | -0.65   | May-75 | 0.64         | 0.75         | 0.23          | 0.68           | 0.32    | Jun-84 | 0.02         | 0.10         | 0.07          | 0.28           | 0.14    |

|        |       |       |       |       |       |        |       |       |       |       |       |        |       |       |       |       |       |        |       |       |       |       |       |
|--------|-------|-------|-------|-------|-------|--------|-------|-------|-------|-------|-------|--------|-------|-------|-------|-------|-------|--------|-------|-------|-------|-------|-------|
| Sep-56 | -2.81 | -2.80 | -2.72 | -2.82 | -2.77 | May-66 | -1.48 | -1.37 | -2.24 | -1.88 | -2.20 | Jun-75 | 0.65  | 0.77  | 0.94  | 1.25  | 1.05  | Jul-84 | 0.06  | 0.14  | 0.45  | 0.62  | 0.72  |
| May-57 | -2.11 | -2.05 | -2.03 | -2.33 | -2.39 | Jun-66 | -0.75 | -0.59 | -0.75 | -0.65 | -1.10 | Jul-75 | -0.59 | -0.41 | -0.30 | -0.89 | -0.82 | Aug-84 | -2.85 | -2.84 | -2.28 | -2.30 | -1.31 |
| Jun-57 | -2.71 | -2.69 | -2.45 | -2.49 | -2.36 | Jul-66 | -1.55 | -1.45 | -1.78 | -1.61 | -1.98 | Aug-75 | -0.76 | -0.60 | 0.41  | 0.24  | 0.37  | Sep-84 | 0.47  | 0.58  | 0.80  | 0.43  | 0.40  |
| Jul-57 | -1.05 | -0.91 | -1.47 | -1.61 | -2.31 | Aug-66 | -1.80 | -1.72 | -1.46 | -0.97 | -0.32 | Sep-75 | 0.38  | 0.48  | 0.46  | 0.32  | 0.41  | May-85 | 0.71  | 0.82  | 0.69  | 0.74  | 0.44  |
| Aug-57 | -2.53 | -2.50 | -2.52 | -2.64 | -2.68 | Sep-66 | 1.85  | 2.04  | 1.83  | 1.79  | 1.28  | May-76 | -0.09 | 0.04  | -1.91 | -0.75 | -1.90 | Jun-85 | 1.15  | 1.29  | 2.11  | 1.98  | 1.53  |
| Sep-57 | -2.89 | -2.89 | -2.82 | -2.92 | -2.89 | May-67 | 1.02  | 1.15  | -0.20 | 0.11  | -1.02 | Jun-76 | -1.32 | -1.20 | -1.82 | -1.52 | -1.44 | Jul-85 | -1.94 | -1.87 | -1.06 | -1.01 | -0.45 |
| May-58 | 1.03  | 1.17  | 0.10  | -0.05 | -2.64 | Jun-67 | 0.16  | 0.24  | 0.42  | 0.47  | 0.35  | Jul-76 | -1.30 | -1.17 | -0.92 | -0.37 | -0.44 | Aug-85 | -1.08 | -0.95 | -1.12 | -0.92 | -0.42 |
| Jun-58 | -0.30 | -0.10 | -1.14 | -1.20 | -2.19 | Jul-67 | 0.11  | 0.19  | -0.18 | 0.12  | -0.38 | Aug-76 | -0.18 | 0.01  | -0.39 | -0.18 | -0.38 | Sep-85 | 0.06  | 0.13  | -0.31 | -0.24 | -0.53 |
| Jul-58 | -1.90 | -1.82 | -2.36 | -2.30 | -2.74 | Aug-67 | -0.55 | -0.37 | -0.63 | -0.57 | -1.11 | Sep-76 | -2.10 | -2.04 | -1.97 | -1.96 | -2.06 | May-86 | 0.13  | 0.21  | -1.24 | -0.72 | -1.32 |
| Aug-58 | -1.58 | -1.48 | -1.68 | -1.94 | -2.39 | Sep-67 | 0.34  | 0.43  | -0.55 | -0.29 | -1.30 | May-77 | 2.78  | 3.02  | 1.74  | 1.69  | 0.50  | Jun-86 | -1.80 | -1.72 | -0.93 | -0.73 | -0.28 |
| Sep-58 | -2.28 | -2.23 | -2.39 | -2.61 | -2.84 | May-68 | -0.76 | -0.61 | -1.06 | -0.18 | -0.29 | Jun-77 | 0.36  | 0.46  | 0.19  | 0.48  | 0.09  | Jul-86 | -2.40 | -2.36 | -1.65 | -1.76 | -1.23 |
| May-59 | -1.80 | -1.72 | -2.06 | -2.42 | -2.64 | Jun-68 | 0.70  | 0.81  | 0.98  | 0.97  | 0.64  | Jul-77 | -2.12 | -2.06 | -0.80 | -1.07 | 0.06  | Aug-86 | -0.73 | -0.57 | 0.05  | 0.09  | 0.20  |
| Jun-59 | -2.09 | -2.02 | -1.75 | -1.87 | -1.75 | Jul-68 | 0.49  | 0.59  | 0.74  | 0.69  | 0.38  | Aug-77 | -0.77 | -0.61 | -0.69 | -0.60 | -0.50 | Sep-86 | 0.48  | 0.58  | 0.29  | 0.72  | 0.38  |
| Jul-59 | -2.84 | -2.83 | -2.48 | -2.51 | -2.27 | Aug-68 | -2.00 | -1.94 | -1.15 | -1.03 | -0.55 | Sep-77 | -0.81 | -0.65 | -1.68 | -1.19 | -0.85 | May-87 | 0.15  | 0.24  | 0.25  | 0.16  | 0.23  |
| Aug-59 | -2.54 | -2.51 | -2.61 | -2.69 | -2.74 | Sep-68 | 0.11  | 0.19  | 0.33  | 0.37  | 0.21  | May-78 | 2.08  | 2.29  | 1.94  | 2.03  | 1.56  | Jun-87 | -0.64 | -0.48 | 0.02  | -0.13 | -0.45 |
| Sep-59 | -2.57 | -2.54 | -2.65 | -2.63 | -2.62 | May-69 | 1.79  | 1.97  | 1.26  | 1.71  | 0.74  | Jun-78 | -0.42 | -0.23 | -0.19 | 0.00  | -0.60 | Jul-87 | -2.86 | -2.85 | -2.90 | -2.92 | -2.93 |
| May-60 | -2.41 | -2.37 | -2.32 | -2.55 | -2.56 | Jun-69 | -0.84 | -0.68 | -0.23 | 0.08  | -0.22 | Jul-78 | -1.83 | -1.75 | -0.81 | -0.50 | 0.05  | Aug-87 | 1.25  | 1.40  | 0.45  | 1.05  | 0.31  |

| Glencuse | Hanwella | Holombuwa | Kithulgala | Norwood | Date   | Glencuse | Hanwella | Holombuwa | Kithulgala | Norwood | Date   | Glencuse | Hanwella | Holombuwa | Kithulgala | Norwood | Date   | Glencuse | Hanwella | Holombuwa | Kithulgala | Norwood |
|----------|----------|-----------|------------|---------|--------|----------|----------|-----------|------------|---------|--------|----------|----------|-----------|------------|---------|--------|----------|----------|-----------|------------|---------|
| 1.03     | 1.17     | 0.59      | 0.42       | 0.21    | May-97 | 0.62     | 0.73     | 0.73      | 0.56       | 1.29    | Jun-06 | 0.68     | -1.03    | 0.43      | 0.90       | 0.54    | Jul-15 | -1.93    | -1.83    | -1.84     | 0.07       | 0.04    |
| -0.24    | -0.04    | -0.44     | 0.02       | -0.61   | Jun-97 | -0.06    | 0.05     | -0.87     | 0.17       | 0.26    | Jul-06 | -0.85    | -1.64    | -1.04     | -0.16      | 0.91    | Aug-15 | -1.05    | -0.90    | -0.01     | 0.61       | -0.88   |
| 0.61     | 0.72     | 0.22      | 0.52       | 0.05    | Jul-97 | 0.33     | 0.42     | 0.51      | 2.49       | 0.49    | Aug-06 | 0.62     | 0.30     | 0.45      | 0.82       | 0.39    | Sep-15 | 0.28     | 0.81     | 0.44      | 0.88       | 0.21    |
| -0.65    | -0.48    | 0.33      | 0.29       | 0.58    | Aug-97 | -1.50    | -1.39    | -0.88     | -0.20      | -0.82   | Sep-06 | -0.15    | -0.36    | -1.01     | -0.29      | -1.19   | May-16 | 4.39     | 3.67     | 3.94      | 4.42       | 3.06    |
| 0.35     | 0.44     | 0.72      | 0.64       | 0.48    | Sep-97 | 1.38     | 1.54     | 1.68      | 1.43       | 0.83    | May-07 | 0.35     | -1.90    | -0.19     | 0.96       | -1.00   | Jun-16 | -0.95    | -0.71    | -0.78     | 0.03       | -1.07   |
| 1.40     | 1.56     | 0.78      | 1.21       | 0.63    | May-98 | 0.45     | 0.55     | 1.69      | 0.59       | 1.17    | Jun-07 | -0.37    | -1.58    | 0.25      | 0.79       | 0.91    | Jul-16 | -1.09    | -1.36    | -1.88     | -0.51      | -1.31   |
| 0.35     | 0.45     | 0.04      | 0.38       | 0.35    | Jun-98 | 0.40     | 0.50     | 0.80      | 1.11       | 1.52    | Jul-07 | 0.04     | -1.71    | -0.79     | 0.51       | 0.61    | Aug-16 | -2.57    | -2.75    | -2.66     | -0.51      | -0.83   |
| 0.55     | 0.66     | 1.01      | 0.90       | 0.48    | Jul-98 | 1.23     | 1.37     | 0.94      | 2.09       | 0.76    | Aug-07 | 0.15     | 0.35     | 0.02      | 0.36       | 0.85    | Sep-16 | -2.21    | -2.39    | -2.51     | -1.48      | -1.91   |
| -0.28    | -0.09    | 0.86      | 0.82       | 1.68    | Aug-98 | 0.06     | 0.14     | 0.61      | 1.07       | 0.61    | Sep-07 | 0.30     | -0.85    | 0.71      | 0.92       | 1.07    | May-17 | 2.05     | 2.51     | 0.56      | 2.06       | 1.12    |
| -1.75    | -1.67    | -0.83     | -0.61      | -0.43   | Sep-98 | 0.51     | 0.62     | 0.97      | 1.90       | 1.30    | May-08 | 1.98     | 0.97     | 1.15      | 1.71       | 0.02    | Jun-17 | 0.09     | -0.26    | -0.18     | 0.58       | -0.83   |
| 0.13     | 0.21     | 0.19      | 0.37       | 0.45    | May-99 | 1.12     | 1.27     | 1.57      | 1.68       | 1.76    | Jun-08 | 0.89     | 0.96     | -0.09     | 0.72       | 0.68    | Jul-17 | -0.77    | -1.67    | -1.56     | -0.31      | -1.43   |
| 0.52     | 0.62     | 0.98      | 1.89       | 1.32    | Jun-99 | -0.57    | -0.40    | 0.16      | 0.82       | 1.48    | Jul-08 | 0.92     | -0.05    | 1.76      | 1.28       | 0.62    | Aug-17 | -0.53    | -0.97    | -0.99     | 0.78       | 0.43    |
| -0.45    | -0.27    | 1.21      | 0.46       | 0.55    | Jul-99 | -1.12    | -0.99    | -0.54     | 0.44       | -0.21   | Aug-08 | -0.79    | -0.90    | -1.50     | -0.24      | -0.94   | Sep-17 | 2.14     | 2.45     | 1.24      | 1.31       | 0.59    |
| 0.03     | 0.10     | -0.13     | 0.62       | -0.24   | Aug-99 | -0.53    | -0.36    | -1.12     | 0.43       | 0.19    | Sep-08 | 0.03     | -0.06    | -1.71     | -0.46      | -1.17   | May-18 | 1.88     | 0.75     | 2.57      | 1.94       | 1.88    |

|       |       |       |       |       |        |       |       |       |       |       |        |       |       |       |       |       |        |       |       |       |       |       |
|-------|-------|-------|-------|-------|--------|-------|-------|-------|-------|-------|--------|-------|-------|-------|-------|-------|--------|-------|-------|-------|-------|-------|
| -2.66 | -2.64 | -2.42 | -1.72 | -0.14 | Sep-99 | 0.30  | 0.39  | -0.57 | 0.83  | -0.25 | May-09 | 0.08  | 0.14  | 0.80  | 1.51  | 2.64  | Jun-18 | 0.62  | 0.25  | 0.60  | 1.98  | 0.76  |
| -2.40 | -2.36 | -2.44 | -2.22 | 0.95  | May-00 | 0.08  | 0.16  | -1.17 | -0.17 | -0.91 | Jun-09 | 0.56  | 0.72  | 0.02  | 1.35  | 0.63  | Jul-18 | -1.48 | -1.91 | -1.54 | -0.39 | 0.63  |
| 0.30  | 0.39  | -1.38 | 0.32  | 0.01  | Jun-00 | 0.14  | 0.23  | -0.07 | 0.59  | 1.38  | Jul-09 | -0.74 | -0.77 | -1.35 | 0.07  | 0.01  | Aug-18 | -1.38 | -1.95 | -1.52 | 0.20  | 1.81  |
| 0.69  | 0.80  | 1.17  | 1.98  | 1.66  | Jul-00 | -2.12 | -2.06 | -2.34 | -1.12 | 0.67  | Aug-09 | 0.48  | -0.79 | 1.25  | 1.08  | 0.23  | Sep-18 | -0.23 | -1.17 | 0.07  | 0.19  | 0.20  |
| -0.41 | -0.22 | 0.25  | 0.59  | 0.03  | Aug-00 | 0.41  | 0.51  | 0.25  | 0.51  | 1.68  | Sep-09 | 0.45  | 0.20  | 0.15  | 0.44  | 0.64  | May-19 | -1.04 | -2.12 | -2.46 | -0.73 | -1.98 |
| -1.52 | -1.42 | -1.72 | -0.05 | -0.42 | Sep-00 | 0.84  | 0.97  | 1.15  | 0.66  | -0.67 | May-10 | 2.19  | 2.81  | 0.54  | 1.38  | 1.11  | Jun-19 | 0.74  | -0.93 | 0.48  | 0.73  | 0.19  |
| -1.11 | -0.97 | -1.94 | -0.17 | -1.70 | May-01 | 0.03  | 0.10  | -2.03 | 0.65  | -0.94 | Jun-10 | 0.24  | 0.15  | 0.32  | 1.45  | 0.84  | Jul-19 | -0.86 | -1.99 | -1.20 | 0.39  | 0.47  |
| 1.25  | 1.37  | 0.01  | 0.63  | 0.38  | Jun-01 | -0.25 | -0.06 | -0.92 | -0.04 | 0.42  | Jul-10 | -0.16 | 0.07  | -0.39 | 0.61  | 0.94  | Aug-19 | 1.03  | -0.78 | 1.29  | 1.65  | 1.07  |
| 0.97  | 1.18  | 0.59  | 1.44  | 1.28  | Jul-01 | -1.51 | -1.40 | -0.80 | 0.94  | 1.30  | Aug-10 | -1.55 | -2.27 | -1.34 | 2.21  | 0.98  | Sep-19 | 2.04  | 1.37  | 1.22  | 0.50  | 0.38  |
| 0.06  | 0.01  | -0.94 | 1.41  | 2.02  | Aug-01 | -2.81 | -2.80 | -2.58 | -1.73 | -1.74 | Sep-10 | 1.42  | 1.24  | 0.10  | 0.34  | -0.02 |        |       |       |       |       |       |
| -1.31 | -1.09 | -0.97 | 0.92  | 0.46  | Sep-01 | 0.37  | 0.47  | 0.70  | 0.73  | 0.65  | May-11 | 0.98  | 1.24  | 1.85  | 3.43  | -0.09 |        |       |       |       |       |       |
| 0.71  | 0.83  | 0.33  | 0.72  | -0.43 | May-02 | 0.72  | 0.84  | 0.94  | 0.74  | -1.77 | Jun-11 | -0.19 | -0.94 | -1.37 | 0.24  | -0.55 |        |       |       |       |       |       |
| 1.92  | 2.11  | 0.73  | 2.63  | 2.54  | Jun-02 | -1.05 | -0.92 | 0.17  | 1.01  | 0.44  | Jul-11 | -0.60 | -1.32 | -1.88 | -0.58 | 0.05  |        |       |       |       |       |       |
| 0.55  | 0.65  | -1.60 | 2.55  | 3.82  | Jul-02 | -2.18 | -2.12 | -1.94 | 0.38  | 0.87  | Aug-11 | 0.57  | 0.16  | 0.42  | 0.32  | -0.11 |        |       |       |       |       |       |
| -1.50 | -1.39 | -0.43 | 0.47  | 2.60  | Aug-02 | -1.84 | -1.76 | -1.98 | -0.98 | 0.64  | Sep-11 | 0.85  | 0.25  | -0.15 | 1.01  | -0.09 |        |       |       |       |       |       |
| -2.11 | -2.05 | -1.24 | 0.12  | -0.24 | Sep-02 | -1.05 | -0.91 | -1.13 | -2.01 | -1.88 | May-12 | -1.35 | -0.34 | -2.56 | -0.55 | -2.76 |        |       |       |       |       |       |
| 0.52  | 0.62  | 0.50  | 0.21  | -1.56 | May-03 | 0.13  | 0.22  | -0.49 | 0.39  | 0.50  | Jun-12 | -0.16 | -1.18 | 0.06  | 0.10  | -1.51 |        |       |       |       |       |       |
| 1.06  | 1.19  | 0.57  | 1.03  | 0.27  | Jun-03 | 0.13  | 0.21  | 0.20  | 0.75  | -1.12 | Jul-12 | -1.35 | -1.80 | -1.35 | -0.02 | 0.11  |        |       |       |       |       |       |
| -1.33 | -1.22 | -2.00 | 0.21  | 0.78  | Jul-03 | 0.13  | 0.21  | 0.27  | 1.35  | 0.61  | Aug-12 | 0.46  | 0.22  | -0.31 | 0.21  | 0.12  |        |       |       |       |       |       |
| -0.66 | -0.50 | -1.76 | 0.99  | 0.87  | Aug-03 | -0.88 | -0.73 | 0.07  | 0.95  | 0.09  | Sep-12 | -1.07 | -0.02 | -1.48 | -0.92 | -1.85 |        |       |       |       |       |       |
| -1.61 | -1.52 | -1.70 | 0.18  | 0.01  | Sep-03 | 0.35  | 0.45  | -0.97 | 1.13  | -1.35 | May-13 | 0.85  | 0.91  | 0.90  | 1.62  | 1.64  |        |       |       |       |       |       |
| 0.90  | 1.03  | 0.18  | 0.78  | -0.26 | May-04 | 0.49  | 0.59  | 0.22  | 1.15  | 1.06  | Jun-13 | 1.23  | 1.38  | 1.63  | 1.80  | 2.42  |        |       |       |       |       |       |
| 1.73  | 1.91  | 1.08  | 1.98  | 1.57  | Jun-04 | 0.07  | 0.15  | 0.33  | 0.92  | 0.65  | Jul-13 | 0.45  | 0.15  | -0.09 | 1.36  | 0.89  |        |       |       |       |       |       |
| 1.06  | 1.20  | 0.64  | 2.30  | 1.55  | Jul-04 | -0.52 | -0.34 | 0.30  | 0.57  | 0.30  | Aug-13 | -1.91 | -1.11 | -0.68 | -0.79 | 0.93  |        |       |       |       |       |       |
| -1.43 | -1.32 | -1.08 | 0.02  | 0.67  | Aug-04 | -1.38 | -1.26 | -1.55 | -0.95 | -1.03 | Sep-13 | 0.80  | 0.23  | 0.95  | 1.19  | 0.05  |        |       |       |       |       |       |
| -0.45 | -0.26 | -0.61 | 0.83  | 0.84  | Sep-04 | 1.09  | 1.24  | 0.62  | 0.95  | 0.41  | May-14 | -0.95 | -0.82 | 0.34  | -0.59 | -2.12 |        |       |       |       |       |       |
| -0.72 | -0.56 | -0.87 | 0.76  | 0.48  | May-05 | 0.20  | -0.48 | -1.55 | -0.35 | -0.93 | Jun-14 | 1.02  | 1.01  | 1.00  | 1.42  | 1.45  |        |       |       |       |       |       |
| -1.71 | -1.62 | -2.14 | -0.76 | -2.57 | Jun-05 | 0.38  | -1.01 | 0.27  | 1.04  | 0.87  | Jul-14 | -0.72 | -1.16 | -0.48 | 0.09  | 0.06  |        |       |       |       |       |       |
| -0.47 | -0.29 | 0.81  | 0.43  | 0.16  | Jul-05 | 0.10  | -1.62 | 0.23  | 0.47  | 0.43  | Aug-14 | 1.11  | 0.84  | 0.63  | 1.53  | -0.32 |        |       |       |       |       |       |
| 0.13  | 0.21  | -1.35 | 0.64  | 2.41  | Aug-05 | -1.01 | -2.48 | -1.82 | -0.37 | -0.51 | Sep-14 | 0.54  | 0.29  | 1.43  | 1.40  | 0.05  |        |       |       |       |       |       |
| 0.16  | 0.24  | -1.40 | 0.62  | 1.02  | Sep-05 | -0.73 | -1.59 | -0.45 | 0.56  | 0.68  | May-15 | 0.17  | -0.57 | 0.01  | 0.89  | -1.03 |        |       |       |       |       |       |

|      |      |      |      |      |        |      |      |      |      |      |        |      |      |      |      |      |
|------|------|------|------|------|--------|------|------|------|------|------|--------|------|------|------|------|------|
| 0.82 | 0.95 | 0.98 | 2.37 | 1.41 | May-06 | 0.08 | 0.41 | 0.25 | 1.35 | 0.50 | Jun-15 | 0.82 | 0.72 | 0.08 | 0.77 | 0.10 |
|------|------|------|------|------|--------|------|------|------|------|------|--------|------|------|------|------|------|

**Table S3(b):** Temporal Variability of RAI in the Northeast Monsoon.

| Date   | Glencuse | Hanwella | Holombuwa | Kithulgala | Norwood | Date   | Glencuse | Hanwella | Holombuwa | Kithulgala | Norwood | Date   | Glencuse | Hanwella | Holombuwa | Kithulgala | Norwood |
|--------|----------|----------|-----------|------------|---------|--------|----------|----------|-----------|------------|---------|--------|----------|----------|-----------|------------|---------|
| Jan-51 | -1.97    | -1.90    | -2.03     | -2.32      | -2.36   | Feb-66 | -2.52    | -2.49    | -2.58     | -2.56      | -2.54   | Dec-81 | -1.73    | -1.64    | -1.72     | -1.64      | -1.26   |
| Feb-51 | -2.44    | -2.40    | -2.62     | -2.71      | -2.78   | Dec-66 | -1.48    | -1.38    | -0.70     | -1.38      | -0.49   | Jan-82 | -2.79    | -2.78    | -2.88     | -2.77      | -2.79   |
| Dec-51 | -2.54    | -2.51    | -2.37     | -2.69      | -2.69   | Jan-67 | -2.35    | -2.30    | -1.86     | -2.14      | -1.49   | Feb-82 | -2.87    | -2.86    | -2.96     | -2.93      | -2.96   |
| Jan-52 | -2.45    | -2.41    | -2.16     | -2.57      | -2.53   | Feb-67 | -1.95    | -1.88    | -0.67     | -1.69      | -0.57   | Dec-82 | -1.81    | -1.73    | -0.39     | -1.37      | -0.05   |
| Feb-52 | -2.03    | -1.96    | -2.16     | -2.63      | -2.75   | Dec-67 | 0.10     | 0.18     | 0.39      | 0.09       | 0.20    | Jan-83 | -2.77    | -2.76    | -2.80     | -2.61      | -2.49   |
| Dec-52 | -2.88    | -2.87    | -2.77     | -2.90      | -2.82   | Jan-68 | -2.15    | -2.10    | -2.08     | -1.84      | -1.53   | Feb-83 | -2.65    | -2.63    | -2.76     | -2.66      | -2.66   |
| Jan-53 | -2.48    | -2.44    | -2.63     | -2.73      | -2.75   | Feb-68 | -2.14    | -2.08    | -2.16     | -2.18      | -2.46   | Dec-83 | 0.43     | 0.52     | 0.40      | 0.43       | 0.60    |
| Feb-53 | -2.59    | -2.56    | -2.59     | -2.80      | -2.84   | Dec-68 | -0.72    | -0.55    | -0.30     | -0.61      | -0.22   | Jan-84 | 0.08     | 0.16     | 0.09      | -0.28      | 0.03    |
| Dec-53 | -2.79    | -2.77    | -2.55     | -2.79      | -2.69   | Jan-69 | -1.98    | -1.90    | -1.57     | -2.03      | -1.21   | Feb-84 | 0.06     | 0.14     | 0.29      | 0.11       | 0.34    |
| Jan-54 | -1.50    | -1.39    | -1.97     | -2.45      | -2.73   | Feb-69 | -1.56    | -1.46    | -2.07     | -1.84      | -1.92   | Dec-84 | -1.81    | -1.72    | -1.15     | -1.39      | -0.94   |
| Feb-54 | -2.72    | -2.70    | -2.82     | -2.87      | -2.87   | Dec-69 | 0.64     | 0.75     | 0.61      | 0.30       | 0.78    | Jan-85 | -1.70    | -1.61    | -1.38     | -1.59      | -1.39   |
| Dec-54 | -2.06    | -1.99    | -1.69     | -2.35      | -2.29   | Jan-70 | -1.50    | -1.39    | -1.66     | -1.74      | -1.22   | Feb-85 | -0.68    | -0.52    | -1.38     | -1.35      | -1.57   |
| Jan-55 | -1.68    | -1.59    | -1.85     | -2.32      | -2.46   | Feb-70 | -1.16    | -1.03    | 0.15      | -0.83      | 0.25    | Dec-85 | 0.18     | 0.26     | 0.03      | 0.03       | 0.18    |
| Feb-55 | -2.68    | -2.66    | -2.58     | -2.70      | -2.63   | Dec-70 | -1.73    | -1.64    | -0.30     | -1.19      | 0.36    | Jan-86 | -0.96    | -0.81    | 0.50      | -0.18      | 0.95    |
| Dec-55 | -2.06    | -1.99    | -1.61     | -2.72      | -2.95   | Jan-71 | -1.75    | -1.66    | -1.09     | -1.35      | -0.46   | Feb-86 | -0.46    | -0.28    | 0.13      | -0.40      | -0.24   |
| Jan-56 | -2.72    | -2.70    | -2.80     | -2.91      | -2.94   | Feb-71 | -1.68    | -1.58    | -0.88     | -1.84      | -1.36   | Dec-86 | -0.75    | -0.59    | -1.50     | -0.96      | -0.74   |
| Feb-56 | -2.91    | -2.91    | -2.96     | -3.01      | -3.00   | Dec-71 | -0.12    | 0.03     | 0.56      | -0.03      | 0.49    | Jan-87 | -1.80    | -1.71    | -1.74     | -1.77      | -1.26   |
| Dec-56 | -2.07    | -2.01    | -2.23     | -2.62      | -2.76   | Jan-72 | -2.51    | -2.48    | -2.44     | -2.20      | -1.70   | Feb-87 | -3.00    | -3.00    | -2.95     | -2.98      | -2.83   |
| Jan-57 | -2.80    | -2.79    | -2.80     | -2.87      | -2.83   | Feb-72 | -2.88    | -2.88    | -2.93     | -2.82      | -2.79   | Dec-87 | -1.75    | -1.66    | -1.06     | -2.02      | -1.83   |
| Feb-57 | -2.62    | -2.60    | -2.68     | -2.81      | -2.83   | Dec-72 | -0.48    | -0.30    | 0.17      | -0.65      | 0.19    | Jan-88 | -2.73    | -2.71    | -2.76     | -2.58      | -2.44   |
| Dec-57 | 2.00     | 2.20     | 1.36      | 0.82       | -1.11   | Jan-73 | -2.86    | -2.86    | -2.89     | -2.80      | -2.74   | Feb-88 | -1.23    | -1.11    | -1.24     | -1.05      | -1.17   |
| Jan-58 | -1.99    | -1.92    | -2.17     | -2.44      | -2.75   | Feb-73 | -2.53    | -2.50    | -2.60     | -2.60      | -2.56   | Dec-88 | -1.79    | -1.70    | -1.57     | -1.82      | -1.28   |
| Feb-58 | -2.23    | -2.17    | -2.45     | -2.64      | -2.92   | Dec-73 | 0.19     | 0.27     | 0.41      | 0.00       | 0.36    | Jan-89 | -2.52    | -2.49    | -1.66     | -2.25      | -1.42   |
| Dec-58 | -0.48    | -0.30    | -1.18     | -1.70      | -2.74   | Jan-74 | -3.03    | -3.03    | -3.01     | -3.06      | -3.01   | Feb-89 | -2.96    | -2.96    | -2.87     | -2.95      | -2.80   |
| Jan-59 | -2.47    | -2.44    | -2.63     | -2.81      | -2.89   | Feb-74 | -1.54    | -1.44    | -0.72     | -1.53      | -0.94   | Dec-89 | -2.23    | -2.18    | -2.33     | -2.18      | -1.79   |
| Feb-59 | -2.66    | -2.63    | -2.68     | -2.80      | -2.81   | Dec-74 | -0.34    | -0.15    | 0.06      | 0.01       | 0.63    | Jan-90 | -1.30    | -1.18    | -1.56     | -1.36      | -1.19   |
| Dec-59 | -1.81    | -1.72    | -2.33     | -2.62      | -2.85   | Jan-75 | -2.58    | -2.55    | -2.31     | -2.32      | -1.50   | Feb-90 | -2.27    | -2.22    | -2.82     | -2.62      | -1.97   |
| Jan-60 | -2.89    | -2.89    | -2.77     | -2.84      | -2.72   | Feb-75 | -1.74    | -1.65    | -1.40     | -1.51      | -1.65   | Dec-90 | -1.00    | -0.85    | -0.39     | -0.83      | -0.56   |
| Feb-60 | -1.34    | -1.23    | -1.86     | -2.20      | -2.50   | Dec-75 | -0.85    | -0.70    | -0.91     | -1.01      | -0.17   | Jan-91 | -1.36    | -1.24    | 0.11      | -1.63      | -1.73   |

|        |       |       |       |       |       |        |       |       |       |       |       |        |       |       |       |       |       |
|--------|-------|-------|-------|-------|-------|--------|-------|-------|-------|-------|-------|--------|-------|-------|-------|-------|-------|
| Dec-60 | -2.61 | -2.58 | -2.57 | -2.87 | -2.94 | Jan-76 | -2.66 | -2.64 | -1.90 | -2.32 | -1.16 | Feb-91 | -1.95 | -1.88 | -1.81 | -1.53 | -2.32 |
| Jan-61 | -2.05 | -1.99 | -1.70 | -1.92 | -1.10 | Feb-76 | -2.69 | -2.67 | -2.78 | -2.44 | -2.47 | Dec-91 | -1.42 | -1.31 | -2.26 | -2.22 | -1.01 |
| Feb-61 | -1.79 | -1.71 | -1.35 | -1.87 | -1.07 | Dec-76 | 0.14  | 0.23  | -0.03 | -0.15 | -0.11 | Jan-92 | -2.59 | -2.56 | -2.95 | -2.33 | -2.64 |
| Dec-61 | -0.19 | 0.00  | -0.30 | -0.76 | -0.10 | Jan-77 | -2.88 | -2.87 | -2.93 | -2.93 | -2.91 | Feb-92 | -2.93 | -2.92 | -3.01 | -3.02 | -3.03 |
| Jan-62 | -1.34 | -1.23 | -1.44 | -1.43 | -0.75 | Feb-77 | -2.01 | -1.94 | -2.38 | -2.16 | -2.08 | Dec-92 | -1.91 | -1.84 | -2.02 | -2.50 | -1.38 |
| Feb-62 | -2.38 | -2.34 | -2.02 | -2.34 | -2.09 | Dec-77 | -1.73 | -1.64 | -1.56 | -0.97 | -0.18 | Jan-93 | -2.94 | -2.94 | -2.82 | -2.89 | -2.80 |
| Dec-62 | -1.71 | -1.62 | -1.22 | -1.42 | -0.54 | Jan-78 | -2.54 | -2.51 | -2.30 | -2.06 | -1.61 | Feb-93 | -2.63 | -2.60 | -2.86 | -1.96 | -1.64 |
| Jan-63 | -1.30 | -1.18 | -0.17 | -1.06 | -0.18 | Feb-78 | -2.53 | -2.50 | -2.14 | -2.35 | -1.85 | Dec-93 | 0.10  | 0.18  | 0.43  | 0.09  | 0.88  |
| Feb-63 | -0.25 | -0.05 | -1.15 | -1.06 | -0.93 | Dec-78 | -1.09 | -0.96 | -0.90 | -0.68 | 0.18  | Jan-94 | -1.76 | -1.67 | -2.01 | -1.98 | -1.24 |
| Dec-63 | 0.13  | 0.21  | 0.18  | -0.42 | 0.12  | Jan-79 | -2.75 | -2.74 | -2.58 | -2.44 | -2.10 | Feb-94 | -1.70 | -1.60 | -0.94 | -1.09 | -1.90 |
| Jan-64 | -2.22 | -2.16 | -1.36 | -1.87 | -0.80 | Feb-79 | -1.08 | -0.95 | -1.28 | -1.51 | -1.45 | Dec-94 | -2.60 | -2.57 | -2.62 | -2.43 | -2.34 |
| Feb-64 | -1.32 | -1.20 | -0.75 | -1.01 | 0.00  | Dec-79 | -0.30 | -0.11 | -0.27 | -0.93 | -0.71 | Jan-95 | -1.34 | -1.23 | -0.67 | -1.95 | -1.66 |
| Dec-64 | -1.44 | -1.34 | -1.04 | -1.38 | -0.75 | Jan-80 | -2.91 | -2.91 | -2.86 | -2.79 | -2.56 | Feb-95 | -2.47 | -2.43 | -1.68 | -2.15 | -2.48 |
| Jan-65 | -2.43 | -2.40 | -2.40 | -2.41 | -2.13 | Feb-80 | -2.97 | -2.97 | -2.97 | -2.95 | -2.95 | Dec-95 | -2.59 | -2.56 | -2.98 | -2.35 | -3.03 |
| Feb-65 | -1.93 | -1.86 | -1.31 | -1.84 | -1.19 | Dec-80 | -0.55 | -0.37 | -1.11 | -1.06 | -1.13 | Jan-96 | -1.77 | -1.69 | -2.11 | -2.40 | -0.75 |
| Dec-65 | 0.17  | 0.25  | 0.10  | 0.06  | 0.29  | Jan-81 | -1.19 | -1.07 | -1.54 | -1.74 | -1.77 | Feb-96 | -1.63 | -1.53 | 0.05  | -2.11 | -2.13 |
| Jan-66 | -0.94 | -0.80 | -1.69 | -1.66 | -1.35 | Feb-81 | -2.06 | -1.99 | -2.30 | -2.04 | -1.83 | Dec-96 | -0.82 | -0.66 | -0.80 | -2.10 | -0.93 |

| Date   | Glencuse | Hanwella | Holombuwa | Kithulgala | Norwood | Date   | Glencuse | Hanwella | Holombuwa | Kithulgala | Norwood |
|--------|----------|----------|-----------|------------|---------|--------|----------|----------|-----------|------------|---------|
| Jan-97 | -2.91    | -2.91    | -3.01     | -2.74      | 2.72    | Feb-12 | -1.07    | -0.87    | -0.03     | -2.29      | -0.17   |
| Feb-97 | -2.26    | -2.21    | -2.46     | -2.82      | -2.44   | Dec-12 | 0.57     | 0.04     | 0.71      | 0.15       | -1.11   |
| Dec-97 | 0.05     | 0.13     | 0.93      | 0.10       | 0.43    | Jan-13 | -2.08    | -2.35    | -1.50     | -1.99      | -0.25   |
| Jan-98 | -2.01    | -1.94    | -2.56     | -1.84      | -2.05   | Feb-13 | -0.87    | -0.29    | -1.48     | -1.42      | -1.46   |
| Feb-98 | -2.72    | -2.70    | -3.00     | -2.66      | -2.29   | Dec-13 | -2.79    | -2.39    | -2.67     | -2.88      | -1.50   |
| Dec-98 | 1.04     | 1.17     | 0.96      | 0.02       | 0.48    | Jan-14 | -2.50    | -2.28    | -2.53     | -2.10      | -1.35   |
| Jan-99 | -1.09    | -0.96    | -1.39     | -1.82      | -0.77   | Feb-14 | -2.78    | -2.89    | -0.53     | -1.89      | -2.58   |
| Feb-99 | -0.82    | -0.67    | -0.29     | -1.53      | -0.04   | Dec-14 | 0.75     | 0.61     | 2.13      | 0.31       | 1.27    |
| Dec-99 | -0.57    | -0.40    | -2.03     | -1.64      | -2.07   | Jan-15 | -1.98    | -1.77    | -2.92     | -2.34      | -2.36   |
| Jan-00 | -0.77    | -0.61    | 0.26      | 0.04       | -1.17   | Feb-15 | -1.35    | 0.04     | -2.07     | -1.48      | -0.12   |
| Feb-00 | 0.05     | 0.13     | 0.51      | 0.46       | -0.61   | Dec-15 | -0.17    | 0.45     | 0.88      | 0.09       | -1.03   |
| Dec-00 | -1.03    | -0.89    | -0.70     | -1.59      | -1.35   | Jan-16 | -2.20    | -1.26    | -2.74     | -2.47      | -1.67   |
| Jan-01 | -0.42    | -0.24    | -0.72     | -1.66      | -0.24   | Feb-16 | -0.59    | -1.79    | -2.59     | -2.08      | -2.74   |

|        |       |       |       |       |       |        |       |       |       |       |       |
|--------|-------|-------|-------|-------|-------|--------|-------|-------|-------|-------|-------|
| Feb-01 | -1.20 | -1.08 | -0.74 | -0.53 | -2.11 | Dec-16 | -2.50 | -2.39 | -2.35 | -2.60 | -2.75 |
| Dec-01 | -0.55 | -0.38 | 0.97  | -0.69 | -2.29 | Jan-17 | -0.60 | -1.50 | -1.97 | -2.62 | -2.44 |
| Jan-02 | -2.37 | -2.33 | -2.43 | -2.59 | -2.13 | Feb-17 | -2.99 | -2.46 | -2.88 | -2.97 | -2.75 |
| Feb-02 | -1.58 | -1.49 | -2.66 | -2.47 | -2.38 | Dec-17 | 0.28  | -1.78 | -1.39 | -0.79 | -0.31 |
| Dec-02 | 0.11  | 0.19  | -0.47 | -1.73 | 0.01  | Jan-18 | -2.01 | -2.58 | -2.40 | -2.46 | -2.37 |
| Jan-03 | -1.39 | -1.27 | -1.24 | -1.86 | -0.47 | Feb-18 | -0.06 | -1.56 | -2.54 | -0.80 | -0.38 |
| Feb-03 | -1.73 | -1.64 | -2.56 | -2.15 | -2.13 | Dec-18 | -2.14 | -1.81 | -0.66 | -1.82 | -0.42 |
| Dec-03 | -2.58 | -2.55 | -2.97 | -1.95 | -1.85 | Jan-19 | -2.46 | -2.97 | -2.92 | -2.91 | -1.93 |
| Jan-04 | -2.62 | -2.60 | -3.00 | -2.62 | -2.72 | Feb-19 | 0.10  | -1.47 | -0.75 | 0.16  | -0.48 |
| Feb-04 | -2.33 | -2.29 | -2.68 | -1.84 | -2.47 | Dec-19 | -1.01 | 0.33  | -0.66 | -1.18 | -1.14 |
| Dec-04 | 0.07  | -0.71 | -0.59 | -0.27 | -0.06 |        |       |       |       |       |       |
| Jan-05 | -1.58 | -1.44 | -1.67 | -2.81 | -1.89 |        |       |       |       |       |       |
| Feb-05 | -1.11 | -1.86 | -1.75 | -1.27 | -1.56 |        |       |       |       |       |       |
| Dec-05 | -0.11 | -0.43 | -1.04 | -1.93 | -0.94 |        |       |       |       |       |       |
| Jan-06 | -0.75 | -0.51 | 0.02  | -2.27 | -1.78 |        |       |       |       |       |       |
| Feb-06 | -1.48 | -1.85 | -1.86 | -1.70 | -0.78 |        |       |       |       |       |       |
| Dec-06 | -1.09 | -0.04 | -0.94 | -1.83 | -0.02 |        |       |       |       |       |       |
| Jan-07 | -1.66 | -1.93 | -2.21 | -1.96 | -1.90 |        |       |       |       |       |       |
| Feb-07 | -2.92 | -2.94 | -3.01 | -2.81 | -1.64 |        |       |       |       |       |       |
| Dec-07 | -1.37 | -0.43 | -1.90 | -2.41 | -1.49 |        |       |       |       |       |       |
| Jan-08 | -2.26 | -1.77 | -2.52 | -2.25 | -2.25 |        |       |       |       |       |       |
| Feb-08 | 0.79  | 0.43  | -0.20 | 0.01  | 0.10  |        |       |       |       |       |       |
| Dec-08 | -0.95 | -1.03 | -1.50 | -1.87 | -1.19 |        |       |       |       |       |       |
| Jan-09 | -2.17 | -2.32 | -1.61 | -2.86 | -2.09 |        |       |       |       |       |       |
| Feb-09 | -2.57 | -2.62 | -2.97 | -2.64 | -2.71 |        |       |       |       |       |       |
| Dec-09 | 0.06  | 0.40  | 0.97  | -0.36 | 0.17  |        |       |       |       |       |       |
| Jan-10 | -1.80 | -2.02 | -1.15 | -1.04 | -2.48 |        |       |       |       |       |       |
| Feb-10 | -2.74 | -2.69 | -2.55 | -2.76 | -2.48 |        |       |       |       |       |       |
| Dec-10 | 0.40  | -0.22 | 0.71  | -0.33 | 0.61  |        |       |       |       |       |       |
| Jan-11 | -0.86 | -1.29 | -0.66 | -1.27 | 0.50  |        |       |       |       |       |       |
| Feb-11 | -1.61 | -2.08 | -1.21 | -1.98 | -0.22 |        |       |       |       |       |       |

|        |       |       |       |       |       |
|--------|-------|-------|-------|-------|-------|
| Dec-11 | -0.54 | -0.76 | -0.88 | -2.02 | -1.96 |
| Jan-12 | -1.59 | -0.99 | -2.05 | -2.48 | -2.23 |

**Table S3(c): Temporal Variability of RAI in the First Inter Monsoon.**

| Date   | Glencuse | Hanwella | Holombuwa | Kithulgala | Norwood | Date   | Glencuse | Hanwella | Holombuwa | Kithulgala | Norwood | Date   | Glencuse | Hanwella | Holombuwa | Kithulgala | Norwood |
|--------|----------|----------|-----------|------------|---------|--------|----------|----------|-----------|------------|---------|--------|----------|----------|-----------|------------|---------|
| Jan-51 | -1.97    | -1.90    | -2.03     | -2.32      | -2.36   | Feb-66 | -2.52    | -2.49    | -2.58     | -2.56      | -2.54   | Dec-81 | -1.73    | -1.64    | -1.72     | -1.64      | -1.26   |
| Feb-51 | -2.44    | -2.40    | -2.62     | -2.71      | -2.78   | Dec-66 | -1.48    | -1.38    | -0.70     | -1.38      | -0.49   | Jan-82 | -2.79    | -2.78    | -2.88     | -2.77      | -2.79   |
| Dec-51 | -2.54    | -2.51    | -2.37     | -2.69      | -2.69   | Jan-67 | -2.35    | -2.30    | -1.86     | -2.14      | -1.49   | Feb-82 | -2.87    | -2.86    | -2.96     | -2.93      | -2.96   |
| Jan-52 | -2.45    | -2.41    | -2.16     | -2.57      | -2.53   | Feb-67 | -1.95    | -1.88    | -0.67     | -1.69      | -0.57   | Dec-82 | -1.81    | -1.73    | -0.39     | -1.37      | -0.05   |
| Feb-52 | -2.03    | -1.96    | -2.16     | -2.63      | -2.75   | Dec-67 | 0.10     | 0.18     | 0.39      | 0.09       | 0.20    | Jan-83 | -2.77    | -2.76    | -2.80     | -2.61      | -2.49   |
| Dec-52 | -2.88    | -2.87    | -2.77     | -2.90      | -2.82   | Jan-68 | -2.15    | -2.10    | -2.08     | -1.84      | -1.53   | Feb-83 | -2.65    | -2.63    | -2.76     | -2.66      | -2.66   |
| Jan-53 | -2.48    | -2.44    | -2.63     | -2.73      | -2.75   | Feb-68 | -2.14    | -2.08    | -2.16     | -2.18      | -2.46   | Dec-83 | 0.43     | 0.52     | 0.40      | 0.43       | 0.60    |
| Feb-53 | -2.59    | -2.56    | -2.59     | -2.80      | -2.84   | Dec-68 | -0.72    | -0.55    | -0.30     | -0.61      | -0.22   | Jan-84 | 0.08     | 0.16     | 0.09      | -0.28      | 0.03    |
| Dec-53 | -2.79    | -2.77    | -2.55     | -2.79      | -2.69   | Jan-69 | -1.98    | -1.90    | -1.57     | -2.03      | -1.21   | Feb-84 | 0.06     | 0.14     | 0.29      | 0.11       | 0.34    |
| Jan-54 | -1.50    | -1.39    | -1.97     | -2.45      | -2.73   | Feb-69 | -1.56    | -1.46    | -2.07     | -1.84      | -1.92   | Dec-84 | -1.81    | -1.72    | -1.15     | -1.39      | -0.94   |
| Feb-54 | -2.72    | -2.70    | -2.82     | -2.87      | -2.87   | Dec-69 | 0.64     | 0.75     | 0.61      | 0.30       | 0.78    | Jan-85 | -1.70    | -1.61    | -1.38     | -1.59      | -1.39   |
| Dec-54 | -2.06    | -1.99    | -1.69     | -2.35      | -2.29   | Jan-70 | -1.50    | -1.39    | -1.66     | -1.74      | -1.22   | Feb-85 | -0.68    | -0.52    | -1.38     | -1.35      | -1.57   |
| Jan-55 | -1.68    | -1.59    | -1.85     | -2.32      | -2.46   | Feb-70 | -1.16    | -1.03    | 0.15      | -0.83      | 0.25    | Dec-85 | 0.18     | 0.26     | 0.03      | 0.03       | 0.18    |
| Feb-55 | -2.68    | -2.66    | -2.58     | -2.70      | -2.63   | Dec-70 | -1.73    | -1.64    | -0.30     | -1.19      | 0.36    | Jan-86 | -0.96    | -0.81    | 0.50      | -0.18      | 0.95    |
| Dec-55 | -2.06    | -1.99    | -1.61     | -2.72      | -2.95   | Jan-71 | -1.75    | -1.66    | -1.09     | -1.35      | -0.46   | Feb-86 | -0.46    | -0.28    | 0.13      | -0.40      | -0.24   |
| Jan-56 | -2.72    | -2.70    | -2.80     | -2.91      | -2.94   | Feb-71 | -1.68    | -1.58    | -0.88     | -1.84      | -1.36   | Dec-86 | -0.75    | -0.59    | -1.50     | -0.96      | -0.74   |
| Feb-56 | -2.91    | -2.91    | -2.96     | -3.01      | -3.00   | Dec-71 | -0.12    | 0.03     | 0.56      | -0.03      | 0.49    | Jan-87 | -1.80    | -1.71    | -1.74     | -1.77      | -1.26   |
| Dec-56 | -2.07    | -2.01    | -2.23     | -2.62      | -2.76   | Jan-72 | -2.51    | -2.48    | -2.44     | -2.20      | -1.70   | Feb-87 | -3.00    | -3.00    | -2.95     | -2.98      | -2.83   |
| Jan-57 | -2.80    | -2.79    | -2.80     | -2.87      | -2.83   | Feb-72 | -2.88    | -2.88    | -2.93     | -2.82      | -2.79   | Dec-87 | -1.75    | -1.66    | -1.06     | -2.02      | -1.83   |
| Feb-57 | -2.62    | -2.60    | -2.68     | -2.81      | -2.83   | Dec-72 | -0.48    | -0.30    | 0.17      | -0.65      | 0.19    | Jan-88 | -2.73    | -2.71    | -2.76     | -2.58      | -2.44   |
| Dec-57 | 2.00     | 2.20     | 1.36      | 0.82       | -1.11   | Jan-73 | -2.86    | -2.86    | -2.89     | -2.80      | -2.74   | Feb-88 | -1.23    | -1.11    | -1.24     | -1.05      | -1.17   |
| Jan-58 | -1.99    | -1.92    | -2.17     | -2.44      | -2.75   | Feb-73 | -2.53    | -2.50    | -2.60     | -2.60      | -2.56   | Dec-88 | -1.79    | -1.70    | -1.57     | -1.82      | -1.28   |
| Feb-58 | -2.23    | -2.17    | -2.45     | -2.64      | -2.92   | Dec-73 | 0.19     | 0.27     | 0.41      | 0.00       | 0.36    | Jan-89 | -2.52    | -2.49    | -1.66     | -2.25      | -1.42   |
| Dec-58 | -0.48    | -0.30    | -1.18     | -1.70      | -2.74   | Jan-74 | -3.03    | -3.03    | -3.01     | -3.06      | -3.01   | Feb-89 | -2.96    | -2.96    | -2.87     | -2.95      | -2.80   |
| Jan-59 | -2.47    | -2.44    | -2.63     | -2.81      | -2.89   | Feb-74 | -1.54    | -1.44    | -0.72     | -1.53      | -0.94   | Dec-89 | -2.23    | -2.18    | -2.33     | -2.18      | -1.79   |
| Feb-59 | -2.66    | -2.63    | -2.68     | -2.80      | -2.81   | Dec-74 | -0.34    | -0.15    | 0.06      | 0.01       | 0.63    | Jan-90 | -1.30    | -1.18    | -1.56     | -1.36      | -1.19   |
| Dec-59 | -1.81    | -1.72    | -2.33     | -2.62      | -2.85   | Jan-75 | -2.58    | -2.55    | -2.31     | -2.32      | -1.50   | Feb-90 | -2.27    | -2.22    | -2.82     | -2.62      | -1.97   |
| Jan-60 | -2.89    | -2.89    | -2.77     | -2.84      | -2.72   | Feb-75 | -1.74    | -1.65    | -1.40     | -1.51      | -1.65   | Dec-90 | -1.00    | -0.85    | -0.39     | -0.83      | -0.56   |

|        |       |       |       |       |       |        |       |       |       |       |       |        |       |       |       |       |       |
|--------|-------|-------|-------|-------|-------|--------|-------|-------|-------|-------|-------|--------|-------|-------|-------|-------|-------|
| Feb-60 | -1.34 | -1.23 | -1.86 | -2.20 | -2.50 | Dec-75 | -0.85 | -0.70 | -0.91 | -1.01 | -0.17 | Jan-91 | -1.36 | -1.24 | 0.11  | -1.63 | -1.73 |
| Dec-60 | -2.61 | -2.58 | -2.57 | -2.87 | -2.94 | Jan-76 | -2.66 | -2.64 | -1.90 | -2.32 | -1.16 | Feb-91 | -1.95 | -1.88 | -1.81 | -1.53 | -2.32 |
| Jan-61 | -2.05 | -1.99 | -1.70 | -1.92 | -1.10 | Feb-76 | -2.69 | -2.67 | -2.78 | -2.44 | -2.47 | Dec-91 | -1.42 | -1.31 | -2.26 | -2.22 | -1.01 |
| Feb-61 | -1.79 | -1.71 | -1.35 | -1.87 | -1.07 | Dec-76 | 0.14  | 0.23  | -0.03 | -0.15 | -0.11 | Jan-92 | -2.59 | -2.56 | -2.95 | -2.33 | -2.64 |
| Dec-61 | -0.19 | 0.00  | -0.30 | -0.76 | -0.10 | Jan-77 | -2.88 | -2.87 | -2.93 | -2.93 | -2.91 | Feb-92 | -2.93 | -2.92 | -3.01 | -3.02 | -3.03 |
| Jan-62 | -1.34 | -1.23 | -1.44 | -1.43 | -0.75 | Feb-77 | -2.01 | -1.94 | -2.38 | -2.16 | -2.08 | Dec-92 | -1.91 | -1.84 | -2.02 | -2.50 | -1.38 |
| Feb-62 | -2.38 | -2.34 | -2.02 | -2.34 | -2.09 | Dec-77 | -1.73 | -1.64 | -1.56 | -0.97 | -0.18 | Jan-93 | -2.94 | -2.94 | -2.82 | -2.89 | -2.80 |
| Dec-62 | -1.71 | -1.62 | -1.22 | -1.42 | -0.54 | Jan-78 | -2.54 | -2.51 | -2.30 | -2.06 | -1.61 | Feb-93 | -2.63 | -2.60 | -2.86 | -1.96 | -1.64 |
| Jan-63 | -1.30 | -1.18 | -0.17 | -1.06 | -0.18 | Feb-78 | -2.53 | -2.50 | -2.14 | -2.35 | -1.85 | Dec-93 | 0.10  | 0.18  | 0.43  | 0.09  | 0.88  |
| Feb-63 | -0.25 | -0.05 | -1.15 | -1.06 | -0.93 | Dec-78 | -1.09 | -0.96 | -0.90 | -0.68 | 0.18  | Jan-94 | -1.76 | -1.67 | -2.01 | -1.98 | -1.24 |
| Dec-63 | 0.13  | 0.21  | 0.18  | -0.42 | 0.12  | Jan-79 | -2.75 | -2.74 | -2.58 | -2.44 | -2.10 | Feb-94 | -1.70 | -1.60 | -0.94 | -1.09 | -1.90 |
| Jan-64 | -2.22 | -2.16 | -1.36 | -1.87 | -0.80 | Feb-79 | -1.08 | -0.95 | -1.28 | -1.51 | -1.45 | Dec-94 | -2.60 | -2.57 | -2.62 | -2.43 | -2.34 |
| Feb-64 | -1.32 | -1.20 | -0.75 | -1.01 | 0.00  | Dec-79 | -0.30 | -0.11 | -0.27 | -0.93 | -0.71 | Jan-95 | -1.34 | -1.23 | -0.67 | -1.95 | -1.66 |
| Dec-64 | -1.44 | -1.34 | -1.04 | -1.38 | -0.75 | Jan-80 | -2.91 | -2.91 | -2.86 | -2.79 | -2.56 | Feb-95 | -2.47 | -2.43 | -1.68 | -2.15 | -2.48 |
| Jan-65 | -2.43 | -2.40 | -2.40 | -2.41 | -2.13 | Feb-80 | -2.97 | -2.97 | -2.97 | -2.95 | -2.95 | Dec-95 | -2.59 | -2.56 | -2.98 | -2.35 | -3.03 |
| Feb-65 | -1.93 | -1.86 | -1.31 | -1.84 | -1.19 | Dec-80 | -0.55 | -0.37 | -1.11 | -1.06 | -1.13 | Jan-96 | -1.77 | -1.69 | -2.11 | -2.40 | -0.75 |
| Dec-65 | 0.17  | 0.25  | 0.10  | 0.06  | 0.29  | Jan-81 | -1.19 | -1.07 | -1.54 | -1.74 | -1.77 | Feb-96 | -1.63 | -1.53 | 0.05  | -2.11 | -2.13 |
| Jan-66 | -0.94 | -0.80 | -1.69 | -1.66 | -1.35 | Feb-81 | -2.06 | -1.99 | -2.30 | -2.04 | -1.83 | Dec-96 | -0.82 | -0.66 | -0.80 | -2.10 | -0.93 |

**Table S3(d): Temporal Variability of RAI in the Second Inter Monsoon.**

| Date   | Glencuse | Hanwella | Holombuwa | Kithulgala | Norwood | Date   | Glencuse | Hanwella | Holombuwa | Kithulgala | Norwood | Date   | Glencuse | Hanwella | Holombuwa | Kithulgala | Norwood |
|--------|----------|----------|-----------|------------|---------|--------|----------|----------|-----------|------------|---------|--------|----------|----------|-----------|------------|---------|
| Oct-51 | -2.62    | -2.60    | -2.36     | -2.63      | -2.56   | Oct-74 | -1.07    | -0.94    | -0.55     | -0.99      | -1.05   | Oct-97 | 1.64     | 1.82     | 3.40      | 2.20       | 2.53    |
| Nov-51 | -0.25    | -0.06    | -0.37     | -1.89      | -2.40   | Nov-74 | -1.30    | -1.18    | -0.93     | -1.69      | -1.06   | Nov-97 | 1.08     | 1.22     | 2.12      | 0.41       | 1.42    |
| Oct-52 | -2.42    | -2.38    | -2.09     | -2.34      | -2.24   | Oct-75 | 0.26     | 0.35     | 0.41      | 0.58       | 0.31    | Oct-98 | 0.85     | 0.98     | 1.11      | 0.76       | -0.02   |
| Nov-52 | -2.27    | -2.22    | -2.26     | -2.65      | -2.74   | Nov-75 | 1.60     | 1.77     | 1.61      | 1.21       | 0.80    | Nov-98 | 0.52     | 0.63     | 0.26      | 0.52       | -0.20   |
| Oct-53 | -1.51    | -1.40    | -1.37     | -2.27      | -2.99   | Oct-76 | 1.08     | 1.22     | 0.95      | 0.56       | 0.21    | Oct-99 | 1.81     | 1.99     | 1.49      | 2.03       | 0.55    |
| Nov-53 | -0.79    | -0.63    | -1.01     | -2.19      | -2.67   | Nov-76 | 1.30     | 1.46     | 1.41      | 0.86       | 0.71    | Nov-99 | 0.49     | 0.59     | 0.22      | -0.92      | 0.68    |
| Oct-54 | -0.69    | -0.53    | -0.64     | -1.77      | -2.18   | Oct-77 | 2.63     | 2.86     | 2.86      | 1.81       | 1.73    | Oct-00 | 0.34     | 0.43     | 0.06      | 0.60       | 0.21    |
| Nov-54 | -2.57    | -2.55    | -2.48     | -2.76      | -2.77   | Nov-77 | 0.16     | 0.25     | 0.47      | 0.09       | 0.26    | Nov-00 | -0.48    | -0.30    | 0.10      | -1.29      | 0.03    |
| Oct-55 | -2.61    | -2.59    | -2.22     | -2.67      | -2.66   | Oct-78 | 0.42     | 0.51     | 1.12      | 0.47       | 0.61    | Oct-01 | 0.33     | 0.42     | 0.80      | 1.76       | 0.49    |
| Nov-55 | -1.54    | -1.44    | -1.50     | -2.42      | -2.66   | Nov-78 | 1.14     | 1.29     | 1.96      | 1.13       | 1.40    | Nov-01 | 0.27     | 0.36     | 0.04      | -0.23      | -1.11   |
| Oct-56 | -2.36    | -2.32    | -2.06     | -2.56      | -2.57   | Oct-79 | 0.37     | 0.47     | 0.79      | 0.74       | 1.32    | Oct-02 | 1.61     | 1.78     | 1.35      | 1.05       | 1.15    |
| Nov-56 | -1.46    | -1.36    | -1.07     | -2.16      | -2.29   | Nov-79 | 0.88     | 1.01     | 1.49      | 0.49       | 0.78    | Nov-02 | 0.33     | 0.42     | 0.93      | 0.16       | 0.39    |
| Oct-57 | 0.06     | 0.13     | -0.28     | -1.45      | -2.46   | Oct-80 | 0.75     | 0.87     | 0.72      | 0.38       | 0.44    | Oct-03 | 0.10     | 0.18     | 0.72      | 0.57       | -1.04   |
| Nov-57 | 1.16     | 1.30     | 0.80      | 0.17       | -1.93   | Nov-80 | 0.54     | 0.65     | 0.78      | 0.52       | 0.62    | Nov-03 | 0.49     | 0.59     | 0.80      | -0.70      | 0.82    |
| Oct-58 | 0.63     | 0.74     | 0.31      | -0.33      | -2.17   | Oct-81 | 0.18     | 0.26     | 0.06      | -0.06      | 0.00    | Oct-04 | 0.86     | 1.09     | 1.41      | 2.36       | 0.87    |



|        |       |       |       |       |       |        |       |       |       |       |       |        |       |       |       |       |       |
|--------|-------|-------|-------|-------|-------|--------|-------|-------|-------|-------|-------|--------|-------|-------|-------|-------|-------|
| Nov-58 | 0.10  | 0.18  | -0.28 | -1.30 | -2.48 | Nov-81 | 0.86  | 0.98  | 0.88  | 0.41  | 0.32  | Nov-04 | 1.09  | 0.34  | 0.53  | 0.04  | 0.07  |
| Oct-59 | -1.79 | -1.71 | -1.34 | -2.38 | -2.57 | Oct-82 | 0.71  | 0.83  | 0.94  | 0.68  | 0.53  | Oct-05 | 1.91  | 1.14  | 1.63  | 2.27  | 1.36  |
| Nov-59 | -1.06 | -0.92 | -1.20 | -2.18 | -2.56 | Nov-82 | 1.41  | 1.56  | 1.65  | 1.07  | 0.82  | Nov-05 | 2.83  | 1.46  | 1.96  | 0.98  | 1.11  |
| Oct-60 | 0.01  | 0.08  | -0.64 | -1.82 | -2.41 | Oct-83 | -1.10 | -0.97 | 0.04  | -1.25 | -0.67 | Oct-06 | 2.56  | 3.00  | 2.36  | 1.40  | 2.40  |
| Nov-60 | -0.39 | -0.20 | -0.40 | -1.84 | -2.33 | Nov-83 | 0.41  | 0.51  | 0.52  | 0.27  | 0.39  | Nov-06 | 2.37  | 1.15  | 3.43  | 1.29  | 2.02  |
| Oct-61 | 0.87  | 0.99  | 0.73  | 0.43  | 0.25  | Oct-84 | -0.07 | 0.05  | 0.06  | -0.35 | -0.39 | Oct-07 | 0.60  | 0.25  | 0.47  | 1.02  | 1.07  |
| Nov-61 | 0.68  | 0.79  | 0.67  | 0.42  | 0.50  | Nov-84 | 0.82  | 0.94  | 0.42  | 0.26  | 0.08  | Nov-07 | 0.76  | -1.30 | -0.17 | -0.49 | -0.67 |
| Oct-62 | 1.06  | 1.20  | 1.46  | 0.71  | 0.55  | Oct-85 | 0.78  | 0.90  | 0.89  | 0.80  | 0.47  | Oct-08 | 1.69  | 1.46  | 1.97  | 0.65  | 0.88  |
| Nov-62 | 0.09  | 0.17  | -0.28 | -0.15 | -0.39 | Nov-85 | 0.41  | 0.51  | 0.87  | 0.18  | 0.23  | Nov-08 | 0.30  | 0.15  | 0.91  | -0.84 | 0.30  |
| Oct-63 | 1.94  | 2.13  | 1.32  | 1.12  | 0.69  | Oct-86 | 0.31  | 0.40  | 0.61  | 0.41  | 0.72  | Oct-09 | 1.30  | 0.46  | 0.75  | 0.22  | 1.80  |
| Nov-63 | 1.09  | 1.23  | 1.41  | 0.69  | 0.73  | Nov-86 | -1.15 | -1.02 | -1.06 | -1.12 | -1.11 | Nov-09 | 1.14  | 0.64  | 0.29  | -0.03 | 1.02  |
| Oct-64 | 1.08  | 1.22  | 0.75  | 0.37  | -0.17 | Oct-87 | 1.64  | 1.81  | 1.55  | 1.14  | 1.21  | Oct-10 | 0.26  | -0.46 | 0.75  | 1.20  | 0.47  |
| Nov-64 | 0.07  | 0.14  | 0.46  | -0.04 | 0.02  | Nov-87 | 0.35  | 0.45  | 0.50  | 0.26  | 0.39  | Nov-10 | 1.93  | 0.96  | 2.45  | 1.78  | 1.10  |
| Oct-65 | 1.18  | 1.33  | 1.36  | 0.75  | 0.63  | Oct-88 | -1.32 | -1.20 | -1.61 | -1.63 | -1.85 | Oct-11 | 0.38  | 0.51  | 1.08  | 0.62  | 0.02  |
| Nov-65 | 0.08  | 0.16  | 0.56  | 0.05  | 0.34  | Nov-88 | 0.64  | 0.75  | 1.05  | 0.46  | 0.70  | Nov-11 | -0.09 | -1.20 | -0.74 | -1.47 | -0.33 |
| Oct-66 | 0.92  | 1.05  | 0.69  | 0.59  | 0.43  | Oct-89 | 1.02  | 1.16  | 1.10  | 0.83  | 0.73  | Oct-12 | 1.78  | 1.98  | 2.72  | 1.08  | 2.66  |
| Nov-66 | 0.14  | 0.22  | 0.55  | 0.03  | 0.14  | Nov-89 | 0.49  | 0.59  | 0.92  | 0.30  | 0.42  | Nov-12 | 0.78  | -0.23 | 0.50  | 0.71  | 0.32  |
| Oct-67 | 1.89  | 2.08  | 2.06  | 1.64  | 1.41  | Oct-90 | 0.66  | 0.77  | 1.30  | 0.87  | 1.32  | Oct-13 | 0.86  | 0.15  | 0.19  | 0.76  | 0.25  |
| Nov-67 | 0.83  | 0.96  | 1.50  | 1.02  | 1.37  | Nov-90 | 0.84  | 0.97  | 0.72  | 0.53  | 0.56  | Nov-13 | 0.79  | 0.63  | -0.26 | -1.70 | -0.65 |
| Oct-68 | 0.51  | 0.62  | 1.01  | 0.50  | 0.64  | Oct-91 | 0.79  | 0.91  | 1.30  | 0.94  | 1.15  | Oct-14 | 1.33  | 1.45  | 1.64  | 1.27  | 1.15  |
| Nov-68 | 0.11  | 0.19  | 0.66  | -0.17 | -0.10 | Nov-91 | 0.15  | 0.23  | 1.13  | 0.19  | 0.49  | Nov-14 | -0.05 | 0.26  | 0.31  | 0.03  | -0.22 |
| Oct-69 | 1.67  | 1.85  | 1.91  | 1.08  | 0.87  | Oct-92 | 0.35  | 0.43  | 1.33  | 1.36  | 2.83  | Oct-15 | 1.99  | 1.04  | 1.20  | 2.10  | 1.47  |
| Nov-69 | -0.03 | 0.06  | -0.48 | -0.79 | -0.77 | Nov-92 | 0.89  | 1.00  | 0.88  | 1.07  | 1.59  | Nov-15 | 0.83  | 1.12  | 1.47  | 0.93  | 0.32  |
| Oct-70 | 0.71  | 0.82  | 1.14  | 0.60  | 0.29  | Oct-93 | 1.58  | 1.75  | 2.43  | 1.79  | 2.34  | Oct-16 | -0.40 | 0.13  | -0.50 | -0.63 | -1.77 |
| Nov-70 | 0.97  | 1.11  | 1.03  | 0.52  | 0.71  | Nov-93 | 0.53  | 0.64  | 1.70  | 1.05  | 1.04  | Nov-16 | 0.51  | 1.39  | -0.63 | 0.09  | 0.02  |
| Oct-71 | 0.70  | 0.81  | 0.57  | 0.26  | 0.15  | Oct-94 | 1.51  | 1.67  | 3.01  | 2.08  | 0.76  | Oct-17 | 1.60  | 1.20  | 1.20  | 1.68  | 0.76  |
| Nov-71 | -1.17 | -1.04 | -1.14 | -0.55 | -0.35 | Nov-94 | 0.74  | 0.86  | 1.08  | 0.70  | 1.67  | Nov-17 | 1.18  | 0.36  | 0.12  | 0.19  | 0.18  |
| Oct-72 | 1.43  | 1.59  | 2.23  | 1.35  | 1.51  | Oct-95 | 0.61  | 0.72  | 0.83  | 1.36  | 2.13  | Oct-18 | 2.12  | 0.90  | 2.30  | 1.28  | 1.20  |
| Nov-72 | 0.48  | 0.58  | 0.94  | 0.31  | 0.45  | Nov-95 | 0.71  | 0.82  | 1.38  | 0.21  | 0.29  | Nov-18 | 1.52  | -0.86 | 0.71  | 0.77  | -0.28 |
| Oct-73 | 0.71  | 0.82  | 0.44  | 0.26  | 0.25  | Oct-96 | 0.37  | 0.47  | 0.62  | 0.39  | 1.01  | Oct-19 | 1.85  | 1.26  | 2.19  | 1.57  | 1.18  |
| Nov-73 | 0.58  | 0.68  | 0.35  | 0.06  | 0.01  | Nov-96 | 0.17  | 0.25  | 0.24  | -0.22 | 0.84  | Nov-19 | 2.20  | 1.23  | 1.19  | 0.98  | 0.41  |

**Table S4.** Correlation between ENSO, IOD and RAI.

| Month    | El Nina & SOI | La Nina & SOI | ENSO & IOD |
|----------|---------------|---------------|------------|
| January  | -0.184        | 0.078         | -0.202     |
| February | 0.105         | 0.543         | 0.304      |
| March    | 0.326         | 0.446         | -0.433     |
| April    | -0.045        | 0.622         | 0.094      |
| May      | 0.169         | 0.578         | -0.316     |

|           |        |        |        |
|-----------|--------|--------|--------|
| June      | -0.003 | 0.363  | -0.119 |
| July      | 0.345  | 0.492  | -0.425 |
| August    | -0.24  | -0.732 | 0.625  |
| September | -0.048 | 0.482  | -0.419 |
| October   | -0.356 | -0.52  | 0.424  |
| November  | 0.439  | 0.067  | -0.428 |
| December  | 0.349  | 0.067  | -0.428 |

**Table S5:** Correlation between ENSO, NINO34, IOD and RAI.

| Variables    | SWM          |        |               | FIM       |        |       | NEM          |        |        | SIM           |              |              |
|--------------|--------------|--------|---------------|-----------|--------|-------|--------------|--------|--------|---------------|--------------|--------------|
|              | SOI stand    | NINO34 | IOD           | SOI stand | NINO34 | IOD   | SOI stand    | NINO34 | IOD    | SOI stand     | NINO34       | IOD          |
| Colombo      | 0.066        | 0.041  | 0.061         | 0.041     | -0.118 | 0.109 | 0.087        | -0.028 | 0.005  | <b>-0.184</b> | <b>0.216</b> | <b>0.227</b> |
| Deraniyagala | <b>0.179</b> | -0.051 | 0.005         | -0.028    | 0.040  | 0.148 | 0.026        | -0.022 | 0.067  | <b>-0.218</b> | <b>0.248</b> | <b>0.241</b> |
| Glencuse     | <b>0.138</b> | -0.020 | 0.057         | 0.060     | -0.038 | 0.137 | 0.088        | -0.058 | 0.050  | <b>-0.222</b> | <b>0.290</b> | <b>0.289</b> |
| Hanwella     | <b>0.137</b> | -0.012 | 0.051         | 0.037     | -0.052 | 0.157 | 0.104        | -0.031 | 0.063  | <b>-0.269</b> | <b>0.291</b> | <b>0.327</b> |
| Holombuwa    | <b>0.193</b> | -0.062 | -0.047        | 0.019     | -0.035 | 0.033 | <b>0.141</b> | -0.093 | 0.066  | <b>-0.272</b> | <b>0.349</b> | <b>0.394</b> |
| Kithulgala   | <b>0.128</b> | -0.011 | -0.061        | 0.048     | -0.050 | 0.082 | 0.040        | -0.039 | 0.074  | <b>-0.228</b> | <b>0.258</b> | <b>0.206</b> |
| Norwood      | <b>0.152</b> | -0.059 | <b>-0.161</b> | -0.014    | 0.038  | 0.020 | 0.118        | -0.095 | -0.021 | <b>-0.244</b> | <b>0.262</b> | <b>0.262</b> |
